# Supplementary material for: Photoswitchable hydrazones with pyridine-based rotors and halogen substituents
Source: Royal Society of Chemistry journal article supplement (doi:10.1039/d4ra02909g), 2024-01-01
Supplement: d4ra02909g1.pdf [file d4ra02909g1.pdf]

Supplementary Material

**Photoswitchable hydrazones with pyridine-based rotors and halogen substituents**

Lucie Kotásková, Pawel Jewula, Radovan Herchel, Ivan Nemeč and Petr Neugebauer

NMR = Nuclear magnetic resonance

COSY = Correlation spectroscopy

HSQC = Heteronuclear single-quantum correlation spectroscopy

HMBC = Heteronuclear multiple-bond correlation spectroscopy

UV-VIS = Ultraviolet-visible spectroscopy

MS = Mass spectrometry

|                                                                                                                                                                                                                                                                                                                                          |    |
|------------------------------------------------------------------------------------------------------------------------------------------------------------------------------------------------------------------------------------------------------------------------------------------------------------------------------------------|----|
| <b>Figure S1.</b> <sup>1</sup> H NMR of compound <b>1</b> , CDCl <sub>3</sub> , 500 MHz, 298 K.....                                                                                                                                                                                                                                      | 4  |
| <b>Figure S2.</b> <sup>13</sup> C NMR of compound <b>1</b> , CDCl <sub>3</sub> , 125 MHz, 298 K. ....                                                                                                                                                                                                                                    | 5  |
| <b>Figure S3.</b> <sup>1</sup> H NMR spectrum of <b>2-F</b> , CDCl <sub>3</sub> , 500 MHz, 298 K. ....                                                                                                                                                                                                                                   | 6  |
| <b>Figure S4.</b> <sup>19</sup> F NMR spectrum of <b>2-F</b> , CDCl <sub>3</sub> , 470 MHz, 298 K, ref. CF <sub>3</sub> COOH δ = -78.50 ppm. ....                                                                                                                                                                                        | 7  |
| <b>Figure S5.</b> <sup>1</sup> H- <sup>1</sup> H COSY correlation chart of <b>2-F</b> , CDCl <sub>3</sub> , 500 MHz, 298 K.....                                                                                                                                                                                                          | 8  |
| <b>Figure S6.</b> <sup>13</sup> C- <sup>1</sup> H HMBC correlation chart of <b>2-F</b> , CDCl <sub>3</sub> , 125 MHz-500 MHz, 298 K. ....                                                                                                                                                                                                | 9  |
| <b>Figure S7.</b> <sup>13</sup> C- <sup>1</sup> H HSQC correlation chart of <b>2-F</b> , CDCl <sub>3</sub> , 125 MHz-500 MHz, 298 K. ....                                                                                                                                                                                                | 10 |
| <b>Figure S8.</b> <sup>13</sup> C NMR spectrum of <b>2-F</b> , CDCl <sub>3</sub> , 125 MHz, 298 K. ....                                                                                                                                                                                                                                  | 11 |
| <b>Figure S9.</b> <sup>1</sup> H NMR spectrum of <b>2-Cl</b> , CDCl <sub>3</sub> , 500 MHz, 298 K. ....                                                                                                                                                                                                                                  | 12 |
| <b>Figure S10.</b> <sup>1</sup> H- <sup>1</sup> H COSY correlation chart of <b>2-Cl</b> , CDCl <sub>3</sub> , 500 MHz, 298 K. ....                                                                                                                                                                                                       | 13 |
| <b>Figure S11.</b> <sup>13</sup> C- <sup>1</sup> H HMBC correlation chart of <b>2-Cl</b> , CDCl <sub>3</sub> , 125 MHz-500 MHz, 298 K. ....                                                                                                                                                                                              | 14 |
| <b>Figure S12.</b> <sup>13</sup> C- <sup>1</sup> H HSQC correlation chart of <b>2-Cl</b> , CDCl <sub>3</sub> , 125 MHz-500 MHz, 298 K. ....                                                                                                                                                                                              | 15 |
| <b>Figure S13.</b> <sup>13</sup> C NMR spectrum of <b>2-Cl</b> , CDCl <sub>3</sub> , 125 MHz, 298 K. ....                                                                                                                                                                                                                                | 16 |
| <b>Figure S14.</b> <sup>1</sup> H NMR spectrum of <b>2-Br</b> , CDCl <sub>3</sub> , 500 MHz, 298 K. ....                                                                                                                                                                                                                                 | 17 |
| <b>Figure S15.</b> <sup>1</sup> H- <sup>1</sup> H COSY correlation chart of <b>2-Br</b> , CDCl <sub>3</sub> , 500 MHz, 298 K.....                                                                                                                                                                                                        | 18 |
| <b>Figure S16.</b> <sup>13</sup> C- <sup>1</sup> H HMBC correlation chart of <b>2-Br</b> , CDCl <sub>3</sub> , 125 MHz-500 MHz, 298 K. ....                                                                                                                                                                                              | 19 |
| <b>Figure S17.</b> <sup>13</sup> C- <sup>1</sup> H HSQC correlation chart of <b>2-Br</b> , CDCl <sub>3</sub> , 125 MHz-500 MHz, 298 K. ....                                                                                                                                                                                              | 20 |
| <b>Figure S18.</b> <sup>13</sup> C NMR spectrum of <b>2-Br</b> , CDCl <sub>3</sub> , 125 MHz, 298 K. ....                                                                                                                                                                                                                                | 21 |
| <b>Figure S19.</b> <sup>1</sup> H NMR spectrum of <b>2-I</b> , CDCl <sub>3</sub> , 500 MHz, 298 K. ....                                                                                                                                                                                                                                  | 22 |
| <b>Figure S20.</b> <sup>1</sup> H- <sup>1</sup> H COSY correlation chart of <b>2-I</b> , CDCl <sub>3</sub> , 500 MHz, 298 K.....                                                                                                                                                                                                         | 23 |
| <b>Figure S21.</b> <sup>13</sup> C- <sup>1</sup> H HMBC correlation chart of <b>2-I</b> , CDCl <sub>3</sub> , 125 MHz-500 MHz, 298 K. ....                                                                                                                                                                                               | 24 |
| <b>Figure S22.</b> <sup>13</sup> C- <sup>1</sup> H HSQC correlation chart of <b>2-I</b> , CDCl <sub>3</sub> , 125 MHz-500 MHz, 298 K. ....                                                                                                                                                                                               | 25 |
| <b>Figure S23.</b> <sup>13</sup> C NMR spectrum of <b>2-I</b> , CDCl <sub>3</sub> , 125 MHz, 298 K.....                                                                                                                                                                                                                                  | 26 |
| <b>Figure S24.</b> MS spectrum of <b>2-F</b> in MeOH ([C <sub>15</sub> H <sub>14</sub> N <sub>3</sub> O <sub>2</sub> F+Na] <sup>+</sup> ion, top) and simulated spectrum (bottom).....                                                                                                                                                   | 27 |
| <b>Figure S25.</b> MS spectrum of <b>2-Cl</b> in MeOH ([C <sub>15</sub> H <sub>14</sub> N <sub>3</sub> O <sub>2</sub> Cl+Na] <sup>+</sup> ion, top) and simulated spectrum (bottom).....                                                                                                                                                 | 28 |
| <b>Figure S26.</b> MS spectrum of <b>2-Br</b> in MeOH ([C <sub>15</sub> H <sub>14</sub> N <sub>3</sub> O <sub>2</sub> Br+Na] <sup>+</sup> ion, top) and simulated spectrum (bottom).....                                                                                                                                                 | 29 |
| <b>Figure S27.</b> MS spectrum of <b>2-I</b> in MeOH ([C <sub>15</sub> H <sub>14</sub> N <sub>3</sub> O <sub>2</sub> I+Na] <sup>+</sup> ion, top) and simulated spectrum (bottom).....                                                                                                                                                   | 30 |
| <b>Figure S28.</b> Top – MS spectrum of mixture of compounds <b>2-I</b> ([C <sub>15</sub> H <sub>14</sub> N <sub>3</sub> O <sub>2</sub> I+Na] <sup>+</sup> ion) and <b>2-I_azo</b> ([C <sub>18</sub> H <sub>13</sub> N <sub>5</sub> I <sub>2</sub> +Na] <sup>+</sup> ion) in MeOH. Bottom – simulated spectrum for <b>2-I_azo</b> . .... | 31 |
| <b>Figure S29.</b> Comparison of N-H shift (ppm) of <b>2-F</b> . <sup>1</sup> H NMR spectrum of obtained <b>2-F</b> in blue. <sup>1</sup> H NMR spectrum after 420 nm/30 min. <sup>1</sup> H NMR spectrum after 460 nm/30 min. in green. CDCl <sub>3</sub> , 500 MHz, 298 K.....                                                         | 32 |

|                                                                                                                                                                                                                                                                                                                                             |    |
|---------------------------------------------------------------------------------------------------------------------------------------------------------------------------------------------------------------------------------------------------------------------------------------------------------------------------------------------|----|
| <b>Figure S30.</b> Comparison of C–F shift (ppm) of <b>2-F</b> . $^{19}\text{F}$ NMR spectrum of obtained <b>2-F</b> (blue). $^{19}\text{F}$ NMR spectrum after 420 nm/30 min (red). $^{19}\text{F}$ NMR spectrum after 460 nm/30 min. (green). $\text{CDCl}_3$ , 470 MHz, 298 K, ref. $\text{CF}_3\text{COOH}$ $\delta = -78.50$ ppm. .... | 33 |
| <b>Figure S31.</b> Comparison of N–H shift (ppm) of <b>2-Cl</b> . $^1\text{H}$ NMR spectrum of obtained <b>2-Cl</b> (blue). $^1\text{H}$ NMR spectrum after 420 nm/30 min (red). $^1\text{H}$ NMR spectrum after 460 nm/30 min. (green). $\text{CDCl}_3$ , 500 MHz, 298 K. ....                                                             | 34 |
| <b>Figure S32.</b> Comparison of N–H shift (ppm) of <b>2-Br</b> . $^1\text{H}$ NMR spectrum of obtained <b>2-Br</b> in blue. $^1\text{H}$ NMR spectrum after 420 nm/30 min. $^1\text{H}$ NMR spectrum after 460 nm/30 min. in green. $\text{CDCl}_3$ , 500 MHz, 298 K. ....                                                                 | 35 |
| <b>Figure S33.</b> Comparison of N–H shift (ppm) of <b>2-I</b> . $^1\text{H}$ NMR spectrum of obtained <b>2-I</b> in blue. $^1\text{H}$ NMR spectrum after 420 nm/30 min. $^1\text{H}$ NMR spectrum after 460 nm/30 min. in green. $\text{CDCl}_3$ , 500 MHz, 298 K. ....                                                                   | 36 |
| <b>Figure S34.</b> UV-VIS spectrum of compound <b>2-F</b> before (black line) and after irradiation at 420 nm ( <b>2-F-E</b> , red line) and 460 nm ( <b>2-F-Z</b> , blue line) for 30 minutes ( $2.73 \times 10^{-5}$ M, $\text{CHCl}_3$ ). ....                                                                                           | 37 |
| <b>Figure S35.</b> UV-VIS spectrum of compound <b>2-I</b> before (black line) and after irradiation at 420 nm ( <b>2-I-E</b> , red line) and 460 nm ( <b>2-I-Z</b> , blue line) for 30 minutes ( $1.36 \times 10^{-5}$ M, $\text{CHCl}_3$ ). ....                                                                                           | 38 |
| <b>Figure S36.</b> Isomerization cycles of <b>2-F</b> upon alternating irradiation at 420 nm for 1 min (bottom red dots) and 460 nm for 3 min (top red dots). The absorbances at 370 nm are plotted ( $2.73 \times 10^{-5}$ M, $\text{CHCl}_3$ ). ....                                                                                      | 39 |
| <b>Figure S37.</b> Isomerization cycles of <b>2-F</b> upon alternating irradiation at 420 nm for 20 s (bottom red dots) and 365 nm for 20 s (top red dots). The absorbances at 365 nm are plotted ( $2.41 \times 10^{-5}$ M, toluene). ....                                                                                                 | 40 |
| <b>Figure S38.</b> Isomerization cycles of <b>2-F</b> upon alternating irradiation at 420 nm for 20 s (bottom red dots) and 365 nm for 20 s (top red dots). The absorbances at 365 nm are plotted ( $1.92 \times 10^{-5}$ M, acetonitrile). ....                                                                                            | 41 |
| <b>Figure S39.</b> Isomerization cycles of <b>2-Cl</b> upon alternating irradiation at 420 nm for 1 min (bottom red dots) and 460 nm for 3 min (top red dots). The absorbances at 370 nm are plotted ( $2.73 \times 10^{-5}$ M, $\text{CHCl}_3$ ). ....                                                                                     | 42 |
| <b>Figure S40.</b> Isomerization cycles of <b>2-Cl</b> upon alternating irradiation at 420 nm for 20 s (bottom red dots) and 365 nm for 20 s (top red dots). The absorbances at 371 nm are plotted ( $2.73 \times 10^{-5}$ M, $\text{CHCl}_3$ ). ....                                                                                       | 43 |
| <b>Figure S41.</b> Isomerization cycles of <b>2-Cl</b> upon alternating irradiation at 420 nm for 20 s (bottom red dots) and 365 nm for 20 s (top red dots). The absorbances at 370 nm are plotted ( $2.05 \times 10^{-5}$ M, toluene). ....                                                                                                | 44 |
| <b>Figure S42.</b> Isomerization cycles of <b>2-Cl</b> upon alternating irradiation at 420 nm for 20 s (bottom red dots) and 365 nm for 20 s (top red dots). The absorbances at 367 nm are plotted ( $2.78 \times 10^{-5}$ M, acetonitrile). ....                                                                                           | 45 |
| <b>Figure S43.</b> Isomerization cycles of <b>2-Br</b> upon alternating irradiation at 420 nm for 1 min (bottom red dots) and 460 nm for 1 min (top red dots). The absorbances at 371 nm are plotted ( $2.73 \times 10^{-5}$ M, $\text{CHCl}_3$ ). ....                                                                                     | 46 |
| <b>Figure S44.</b> Isomerization cycles of <b>2-Br</b> upon alternating irradiation at 420 nm for 20 s (bottom red dots) and 365 nm for 20 s (top red dots). The absorbances at 371 nm are plotted ( $2.73 \times 10^{-5}$ M, $\text{CHCl}_3$ ). ....                                                                                       | 47 |
| <b>Figure S45.</b> Isomerization cycles of <b>2-I</b> upon alternating irradiation at 420 nm for 1 min (bottom red dots) and 460 nm for 3 min (top red dots). The absorbances at 370 nm are plotted ( $1.36 \times 10^{-5}$ M, $\text{CHCl}_3$ ). ....                                                                                      | 48 |
| <b>Figure S46.</b> $^1\text{H}$ NMR spectrum of <b>2-Br</b> ( $c = 0.02$ M) recorded after exposition on 460 nm over 3 hours, $\text{CDCl}_3$ , 500 MHz, 298 K. ....                                                                                                                                                                        | 49 |
| <b>Figure S47.</b> Positive ion mode MS spectrum of <b>2-Br</b> (in MeOH) after exposition to 460 nm irradiation for 3 hours at 0.02 M concentration. ....                                                                                                                                                                                  | 50 |

|                                                                                                                                                                                                                                                                                                                                                                                                                                     |    |
|-------------------------------------------------------------------------------------------------------------------------------------------------------------------------------------------------------------------------------------------------------------------------------------------------------------------------------------------------------------------------------------------------------------------------------------|----|
| <b>Figure S48.</b> Negative ion mode MS spectrum of <b>2-Br</b> (in MeOH) after exposition to 460 nm irradiation for 3 hours at 0.02 M concentration.....                                                                                                                                                                                                                                                                           | 51 |
| <b>Figure S49.</b> <sup>1</sup> H NMR spectrum of <b>2-Br</b> (c = 0.1 M) recorded after exposition on 460 nm over 3 hours, CDCl <sub>3</sub> , 500 MHz, 298 K. ....                                                                                                                                                                                                                                                                | 52 |
| <b>Figure S50.</b> <sup>15</sup> N- <sup>1</sup> H HSQC correlation chart of <b>2-Br</b> (c = 0.1 M), CDCl <sub>3</sub> , 50 MHz-500 MHz, 298 K, ref. NH <sub>3(liq.)</sub> δ = 380.20 ppm. ....                                                                                                                                                                                                                                    | 53 |
| <b>Figure S51.</b> <sup>15</sup> N- <sup>1</sup> H HMBC correlation chart of <b>2-Br</b> (c = 0.1 M), CDCl <sub>3</sub> , 50 MHz-500 MHz, 298 K, ref. NH <sub>3(liq.)</sub> δ = 380.20 ppm. ....                                                                                                                                                                                                                                    | 54 |
| <b>Figure S52.</b> The minimal energy pathway for <i>Z-E</i> isomerization for <b>2-F</b> calculated with CAM-B3LYP+D4/def2-TZVP/C-CPCM(CHCl <sub>3</sub> ): relative energies, enthalpies, and Gibbs energies. ....                                                                                                                                                                                                                | 55 |
| <b>Figure S53.</b> The minimal energy pathway for <i>Z-E</i> isomerization for <b>2-Br</b> calculated with CAM-B3LYP+D4/def2-TZVP/C-CPCM(CHCl <sub>3</sub> ): relative energies, enthalpies, and Gibbs energies. ....                                                                                                                                                                                                               | 56 |
| <b>Figure S54.</b> The minimal energy pathway for <i>Z-E</i> isomerization for <b>2-I</b> calculated with CAM-B3LYP+D4/def2-TZVP/C-CPCM(CHCl <sub>3</sub> ): relative energies, enthalpies, and Gibbs energies. ....                                                                                                                                                                                                                | 57 |
| <b>Figure S55.</b> The graphically marked fragments of <b>2-Cl-Z</b> (left) and <b>2-Cl-E*</b> (right) used for ICFT analysis of TD-DFT spectra. ....                                                                                                                                                                                                                                                                               | 75 |
| <b>Figure S56.</b> Depiction of the Laplacian of calculated electron density ∇ <sup>2</sup> ρ( <b>r</b> ) for the optimized geometries (implicit solvation model C-PCM) of studied hydrazone switches in the <i>Z</i> -configuration. The (3, -1) bond critical points (brown dots) and bond paths (black solid and dashed lines) are depicted. ....                                                                                | 76 |
| <b>Figure S57.</b> Depiction of the Laplacian of calculated electron density ∇ <sup>2</sup> ρ( <b>r</b> ) for the optimized geometries (implicit solvation model C-PCM) of studied hydrazone switches in the <i>E</i> -configuration. The (3, -1) bond critical points (brown dots) and bond paths (black solid and dashed lines) are depicted. ....                                                                                | 77 |
| <b>Figure S58.</b> Gradient isosurfaces ( <i>s</i> = 0.42 au) for the optimized geometries (implicit solvation model C-PCM) of studied hydrazone switches in the <i>Z</i> -configuration. The surfaces are colored on a blue-green-red scale according to values of sign(λ <sub>2</sub> ) <i>r</i> , ranging from -0.04 to 0.04 au. Blue indicates strong attractive interactions, and red indicates strong nonbonded overlap. .... | 78 |
| <b>Figure S59.</b> Gradient isosurfaces ( <i>s</i> = 0.42 au) for the optimized geometries (implicit solvation model C-PCM) of studied hydrazone switches in the <i>E</i> -configuration. The surfaces are colored on a blue-green-red scale according to values of sign(λ <sub>2</sub> ) <i>r</i> , ranging from -0.04 to 0.04 au. Blue indicates strong attractive interactions, and red indicates strong nonbonded overlap. .... | 78 |

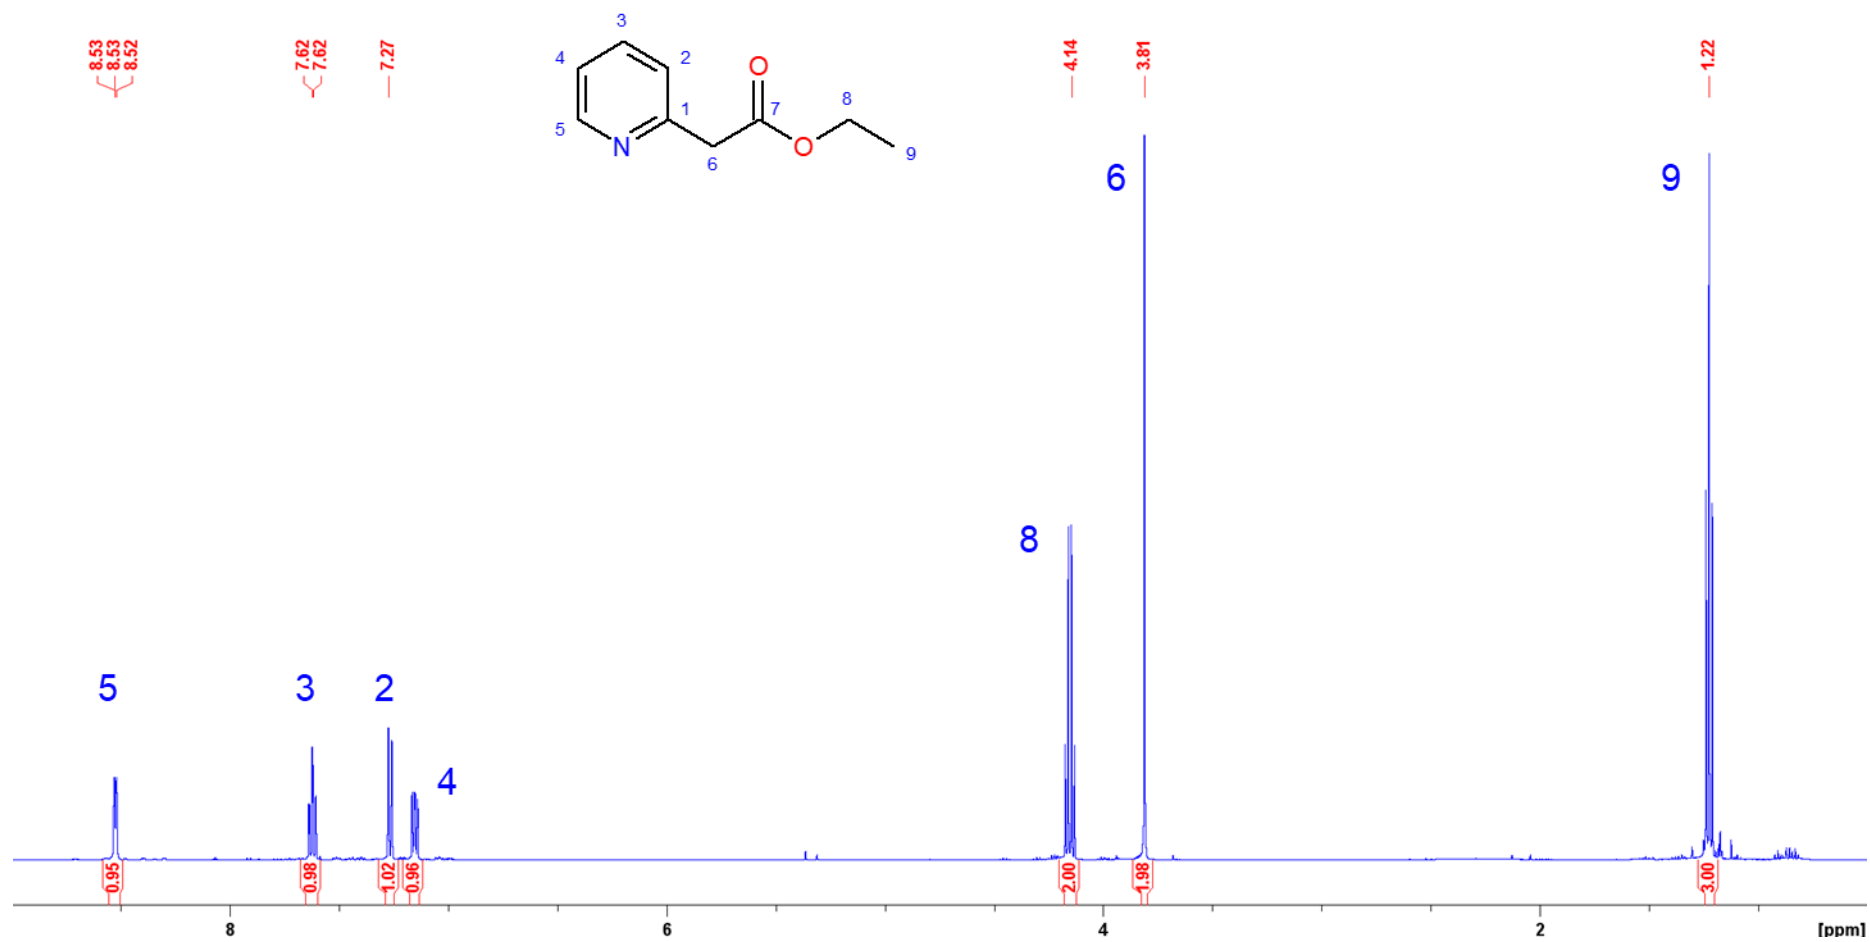

Figure S1. <sup>1</sup>H NMR of compound 1, CDCl<sub>3</sub>, 500 MHz, 298 K.

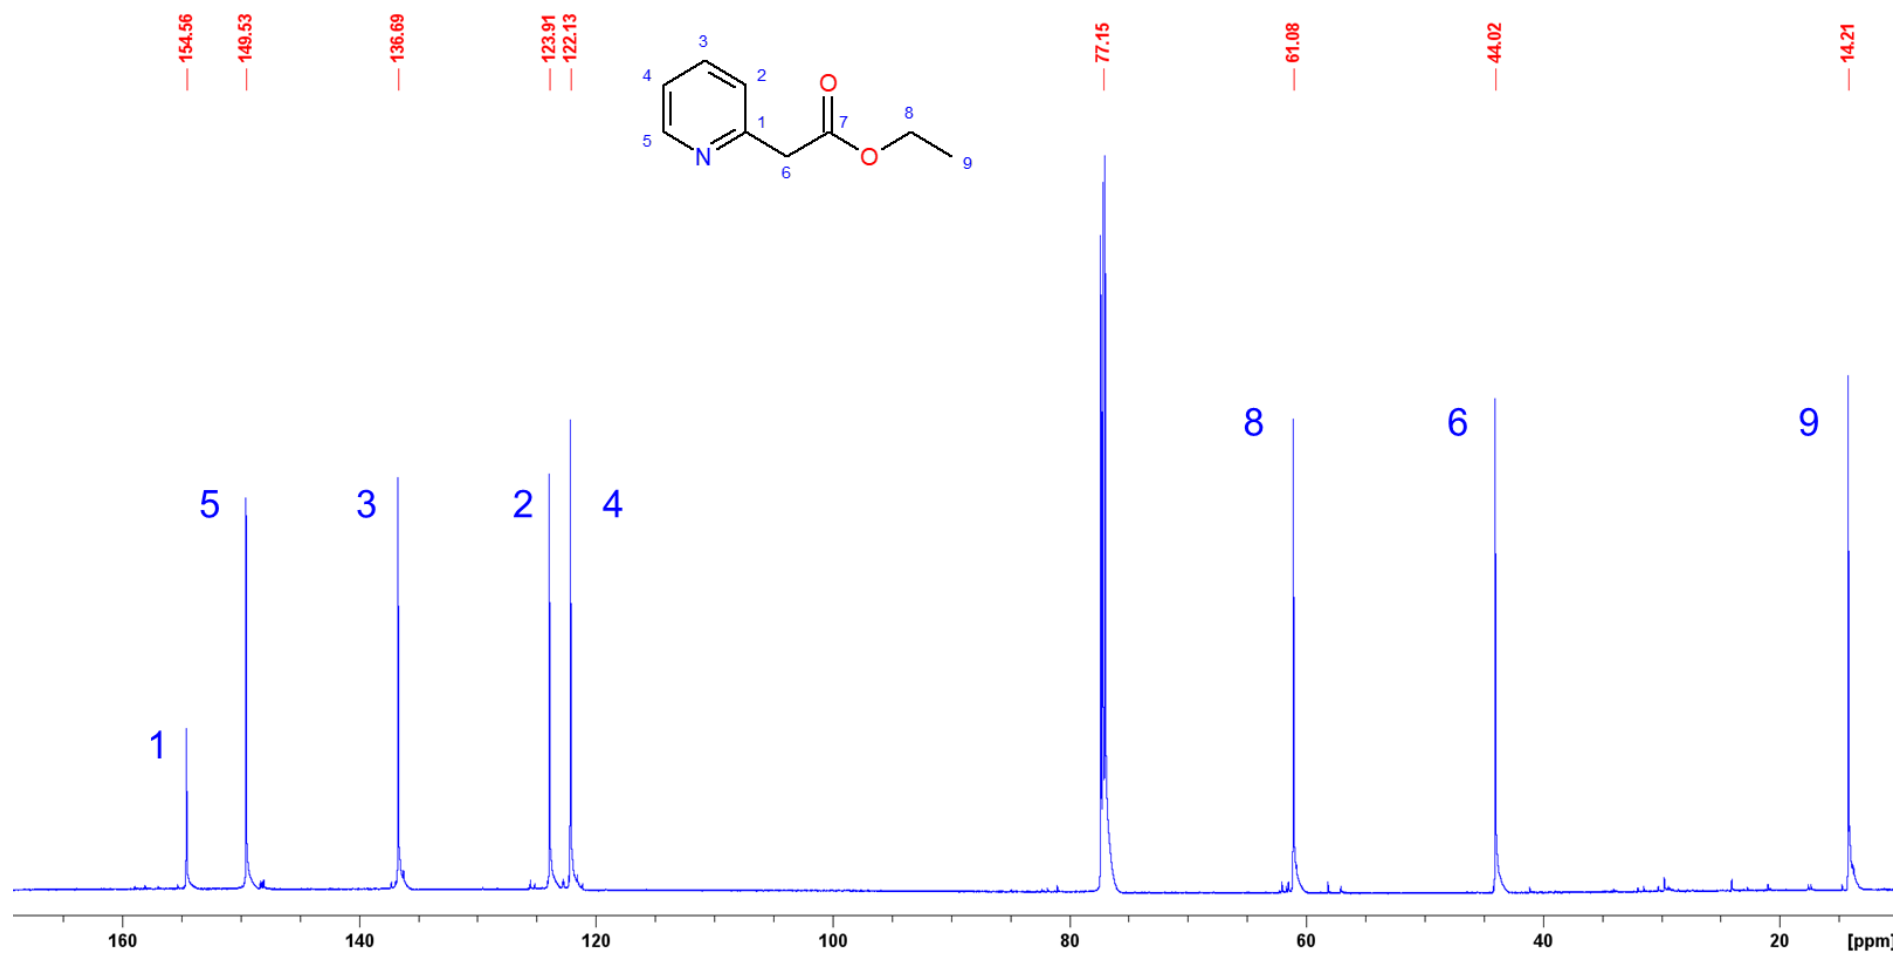

Figure S2. <sup>13</sup>C NMR of compound 1, CDCl<sub>3</sub>, 125 MHz, 298 K.

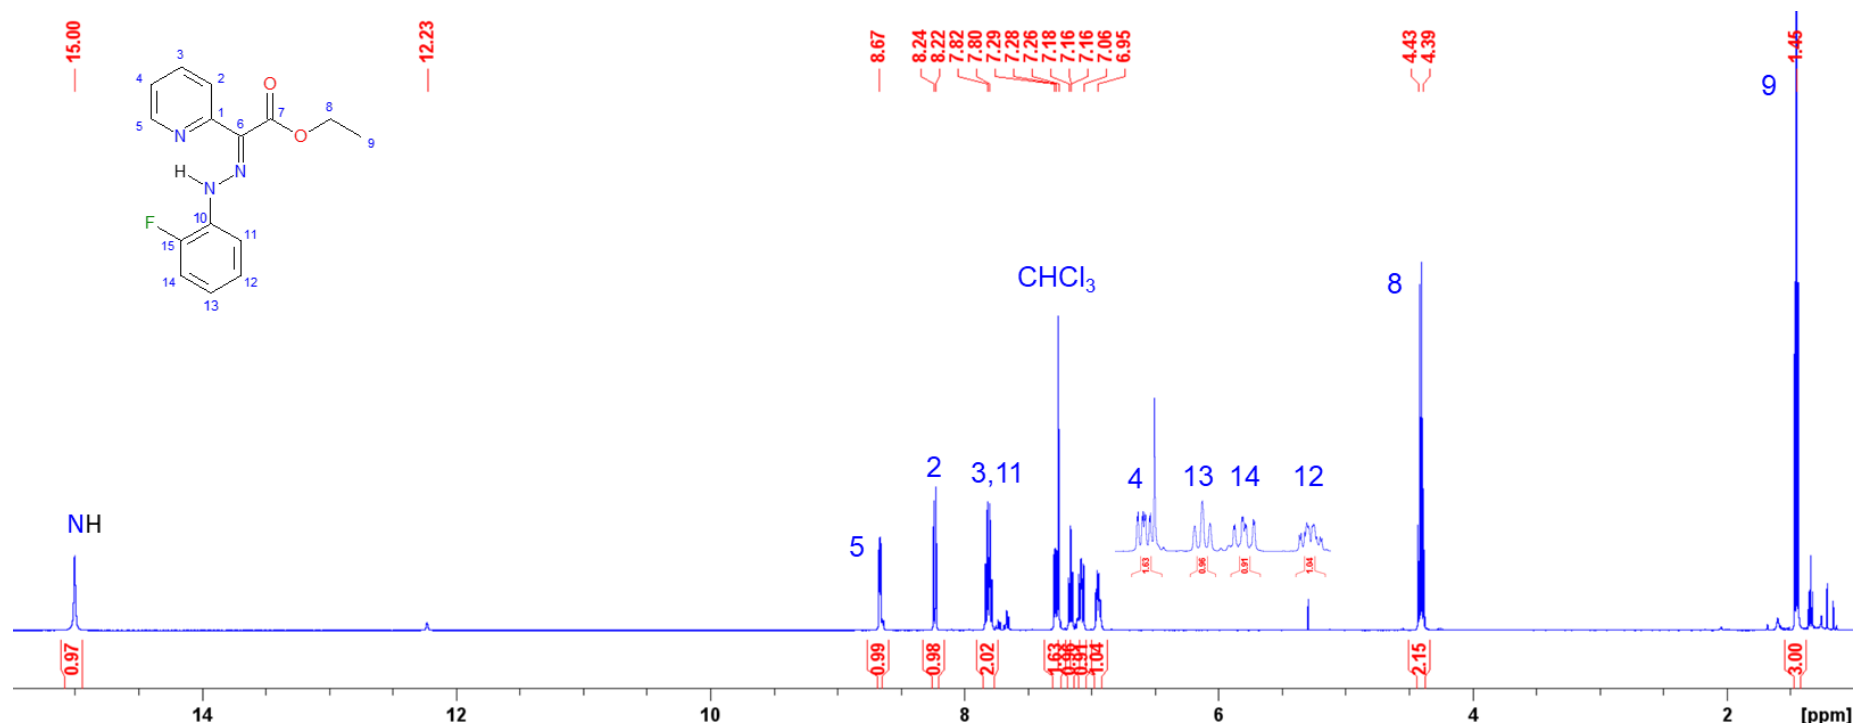

Figure S3. <sup>1</sup>H NMR spectrum of 2-F, CDCl<sub>3</sub>, 500 MHz, 298 K.

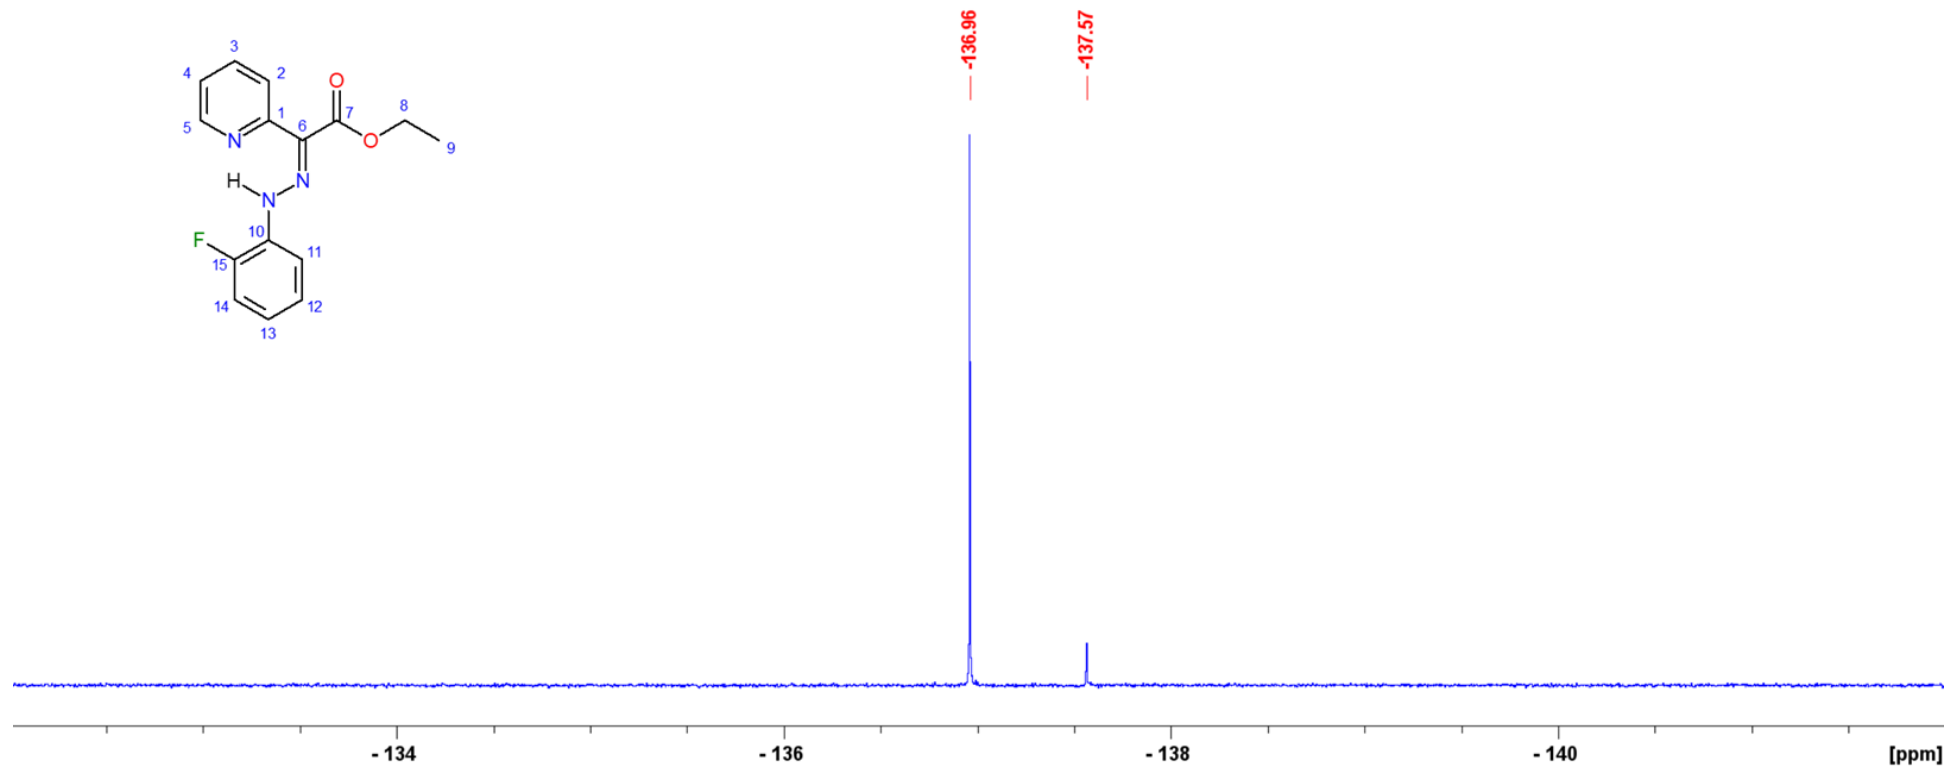

**Figure S4.**  $^{19}\text{F}$  NMR spectrum of 2-F,  $\text{CDCl}_3$ , 470 MHz, 298 K, ref.  $\text{CF}_3\text{COOH}$   $\delta = -78.50$  ppm.

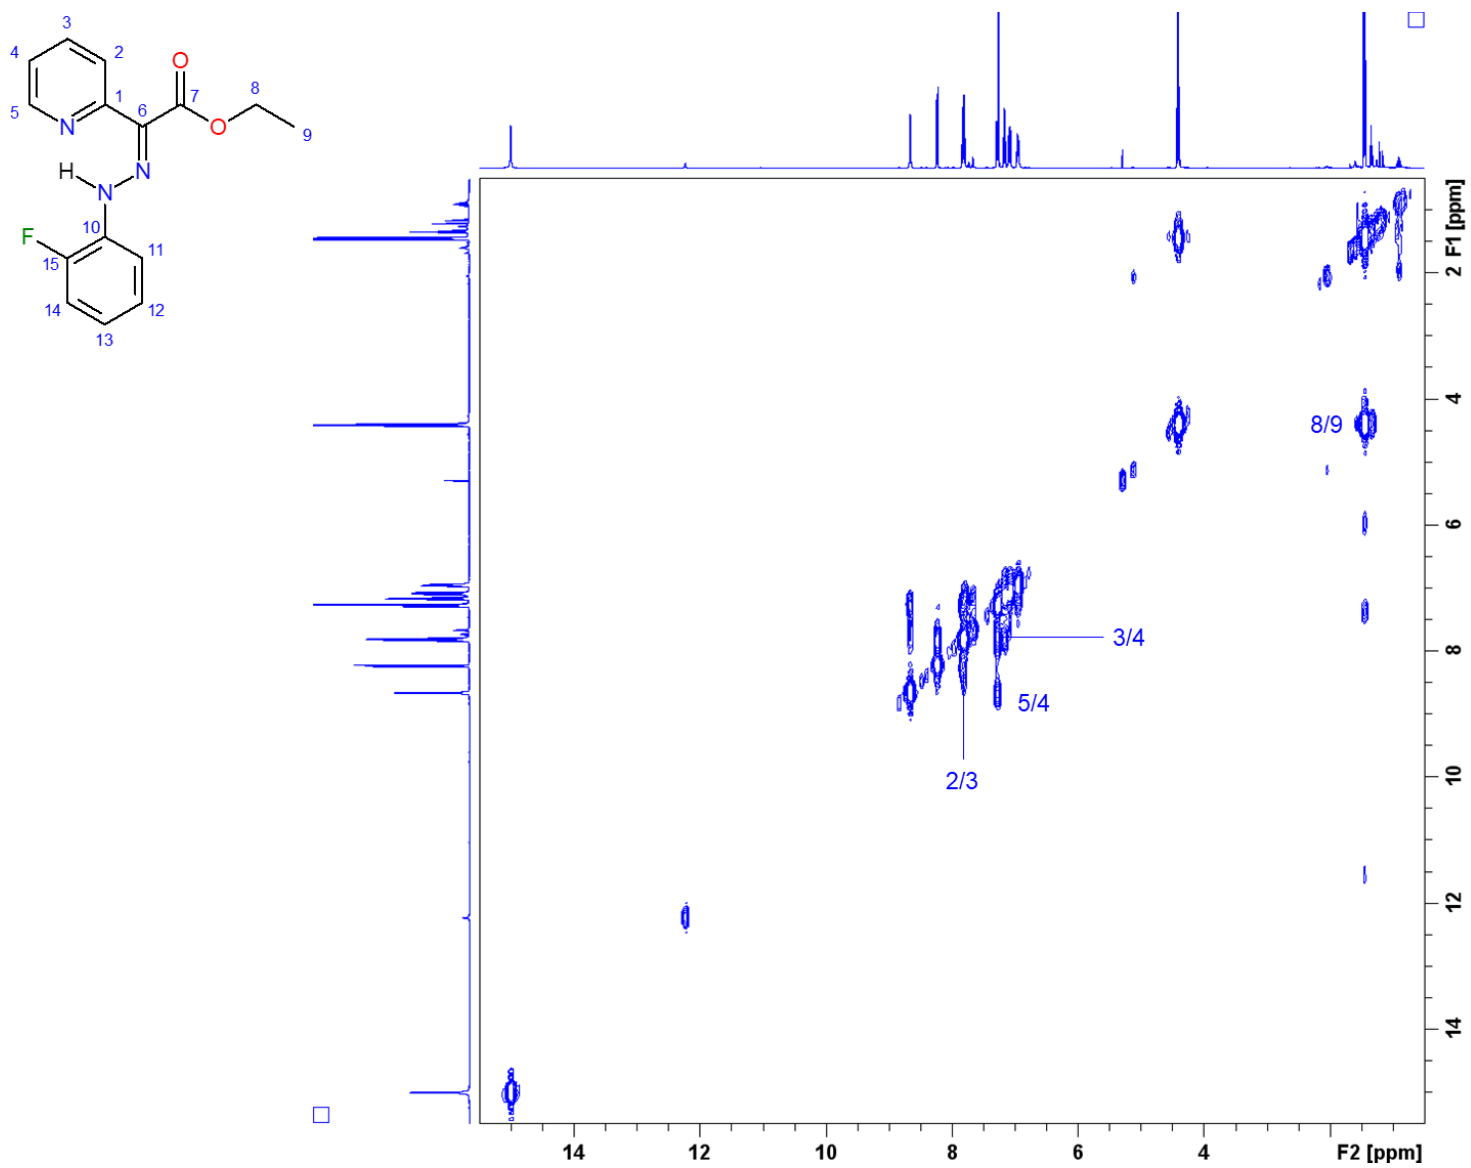

**Figure S5.**  $^1\text{H}$ - $^1\text{H}$  COSY correlation chart of 2-F,  $\text{CDCl}_3$ , 500 MHz, 298 K.



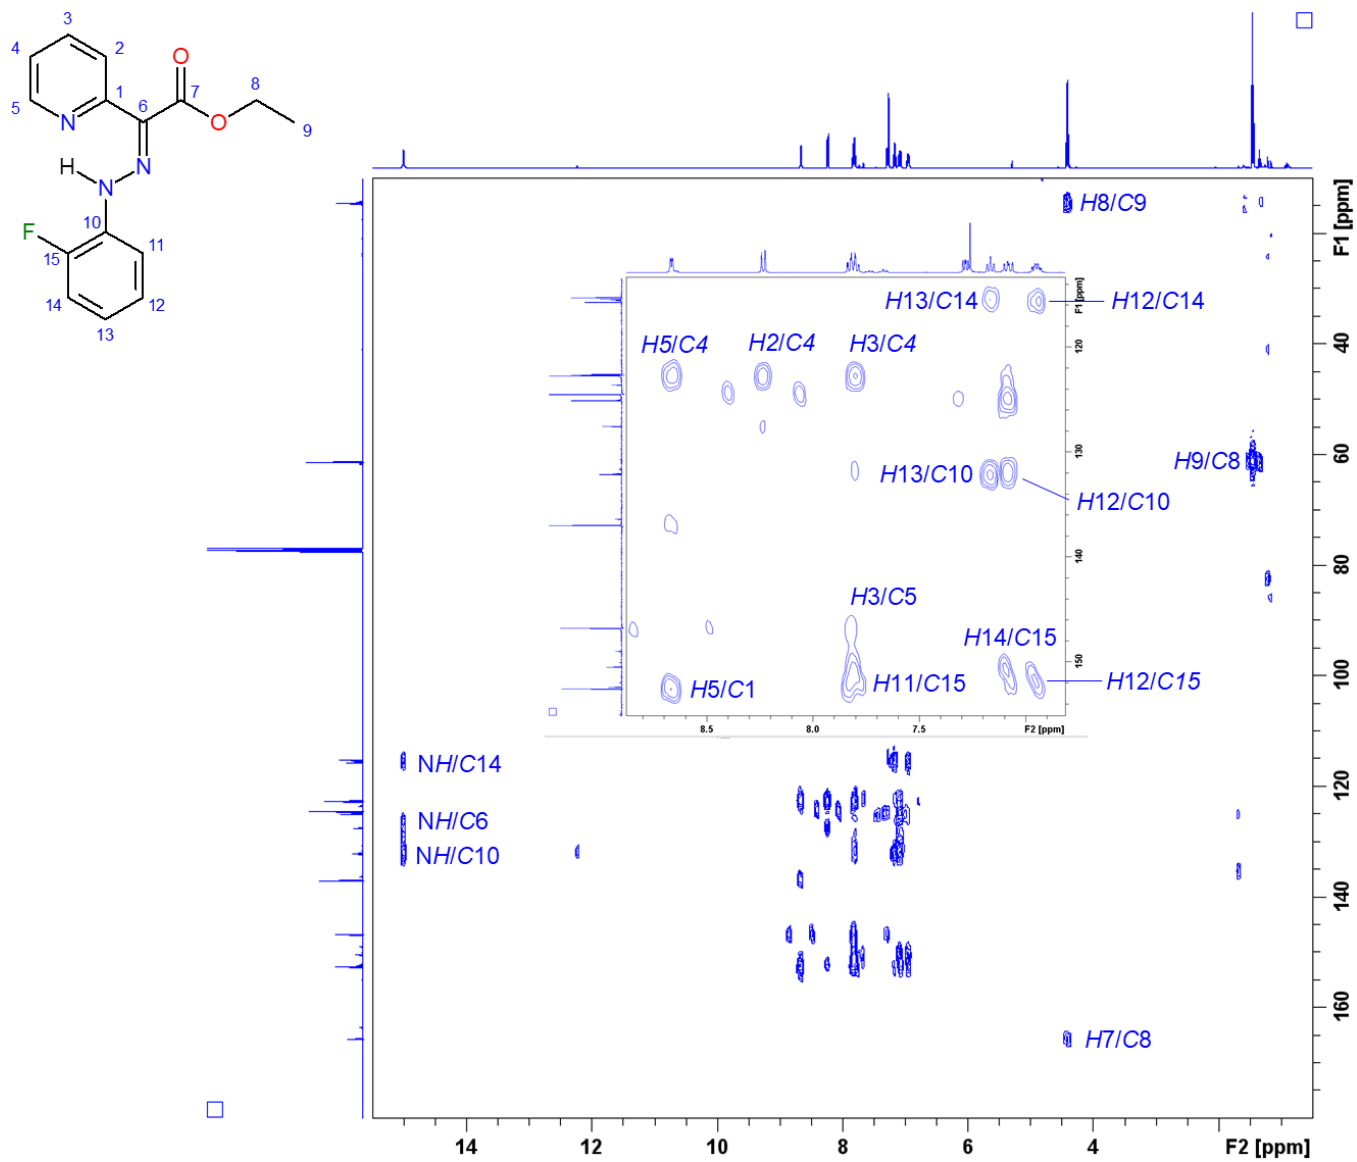

**Figure S6.**  $^{13}\text{C}$ - $^1\text{H}$  HMBC correlation chart of 2-F,  $\text{CDCl}_3$ , 125 MHz–500 MHz, 298 K.

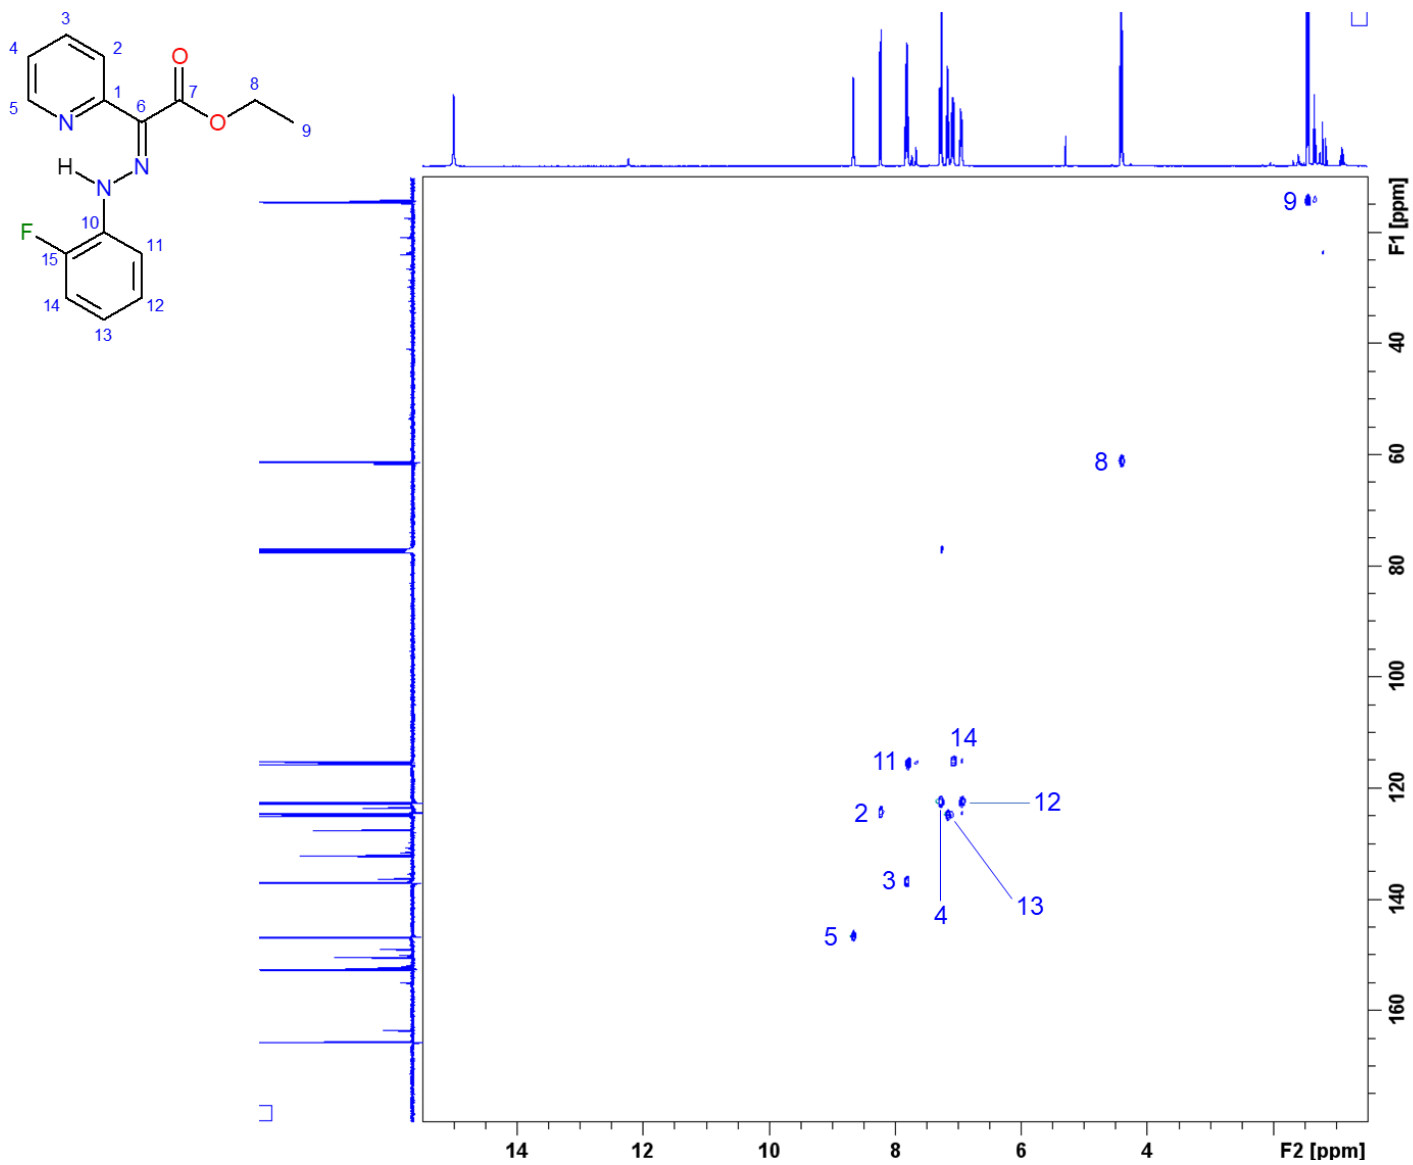

**Figure S7.**  $^{13}\text{C}$ - $^1\text{H}$  HSQC correlation chart of 2-F,  $\text{CDCl}_3$ , 125 MHz–500 MHz, 298 K.

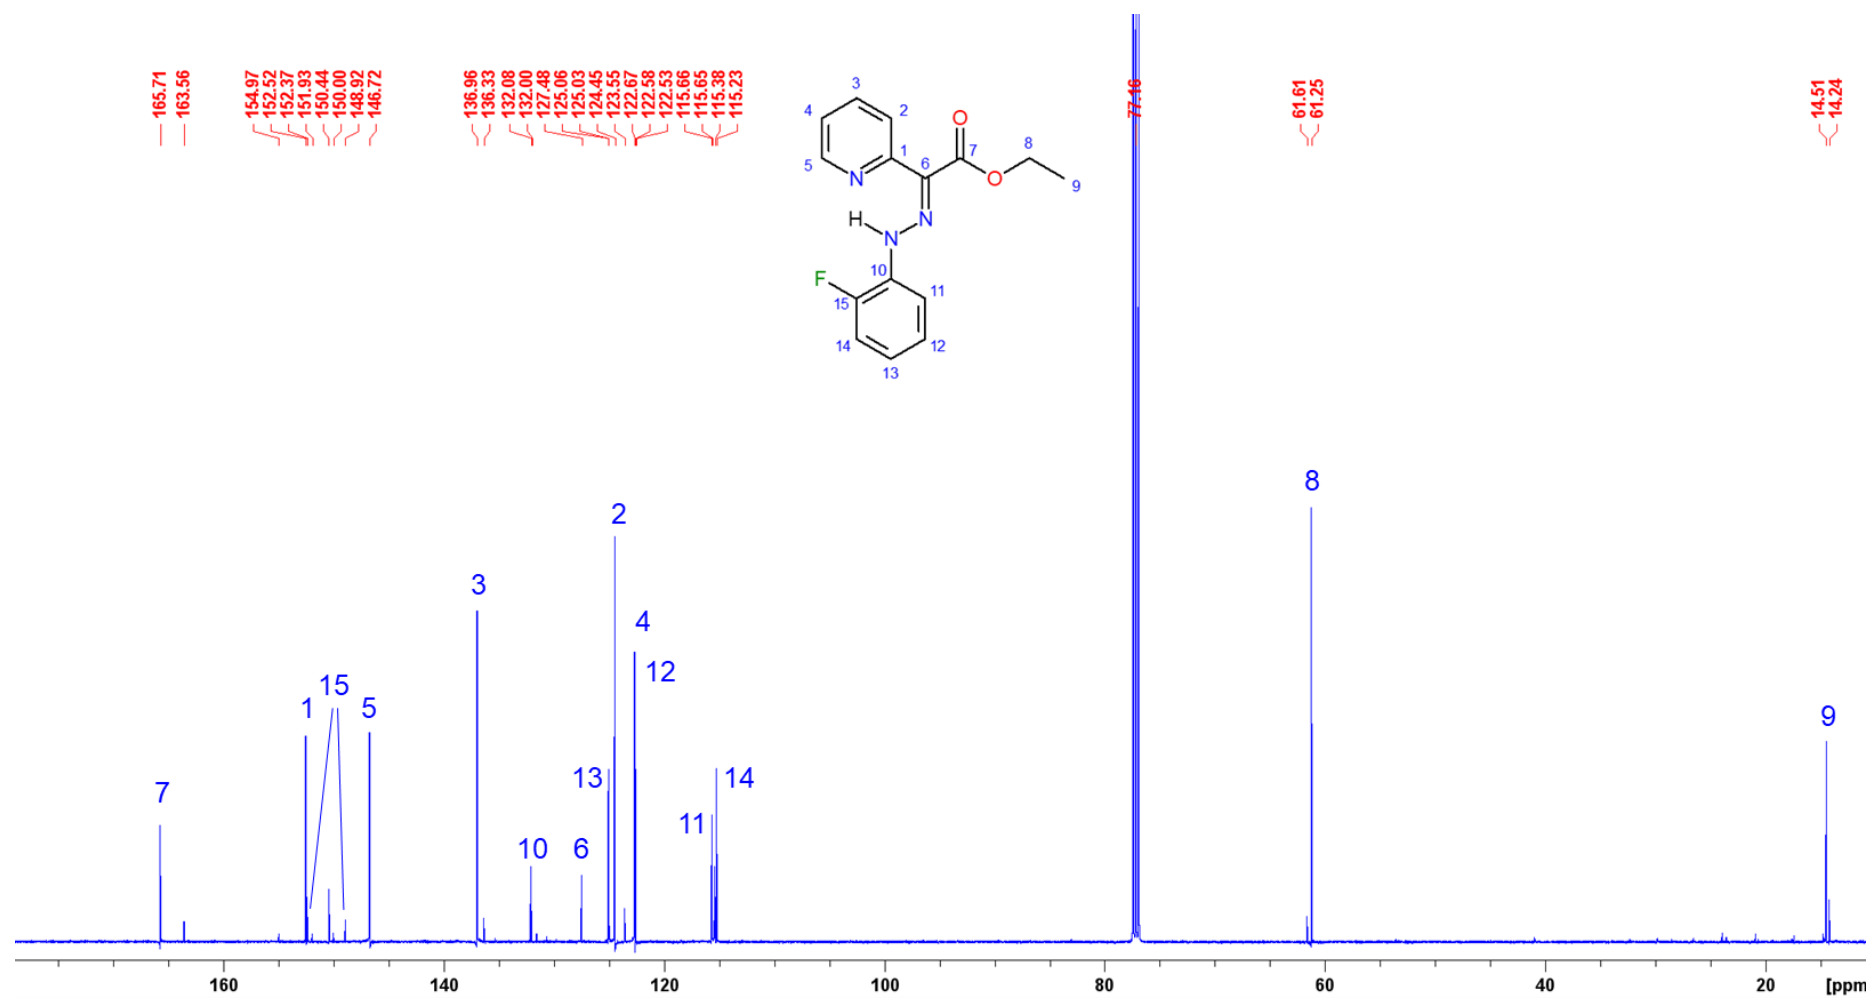

Figure S8. <sup>13</sup>C NMR spectrum of 2-F, CDCl<sub>3</sub>, 125 MHz, 298 K.

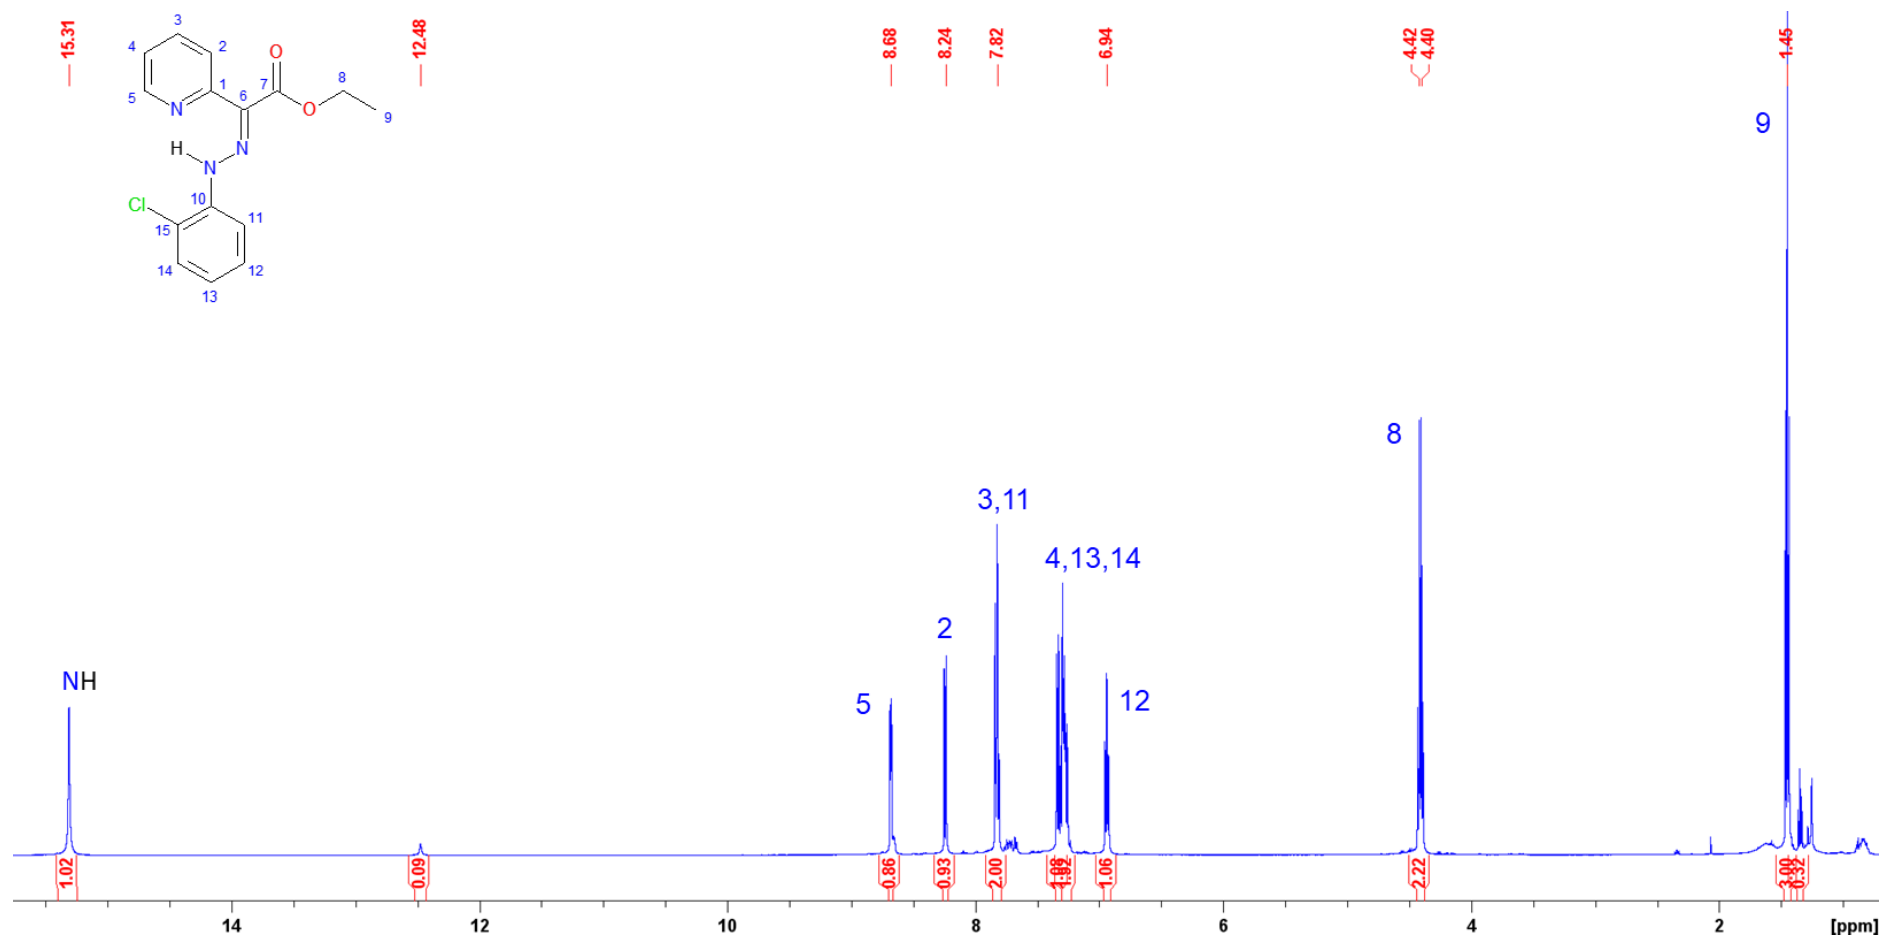

Figure S9. <sup>1</sup>H NMR spectrum of 2-Cl, CDCl<sub>3</sub>, 500 MHz, 298 K.

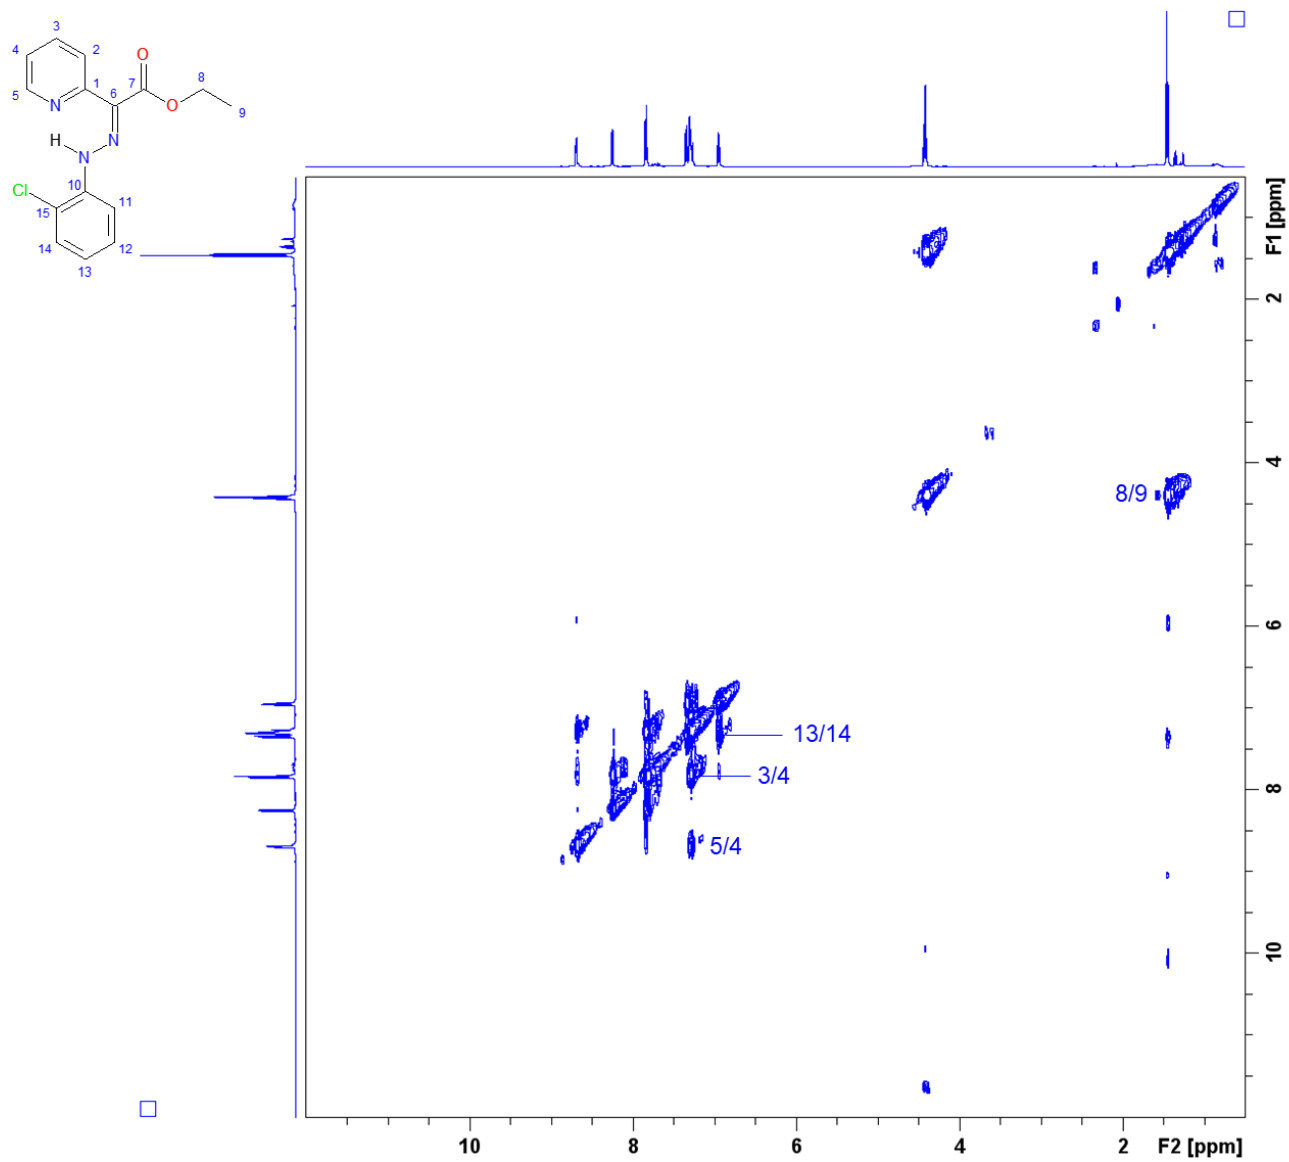

**Figure S10.**  $^1\text{H}$ - $^1\text{H}$  COSY correlation chart of **2-Cl**,  $\text{CDCl}_3$ , 500 MHz, 298 K.

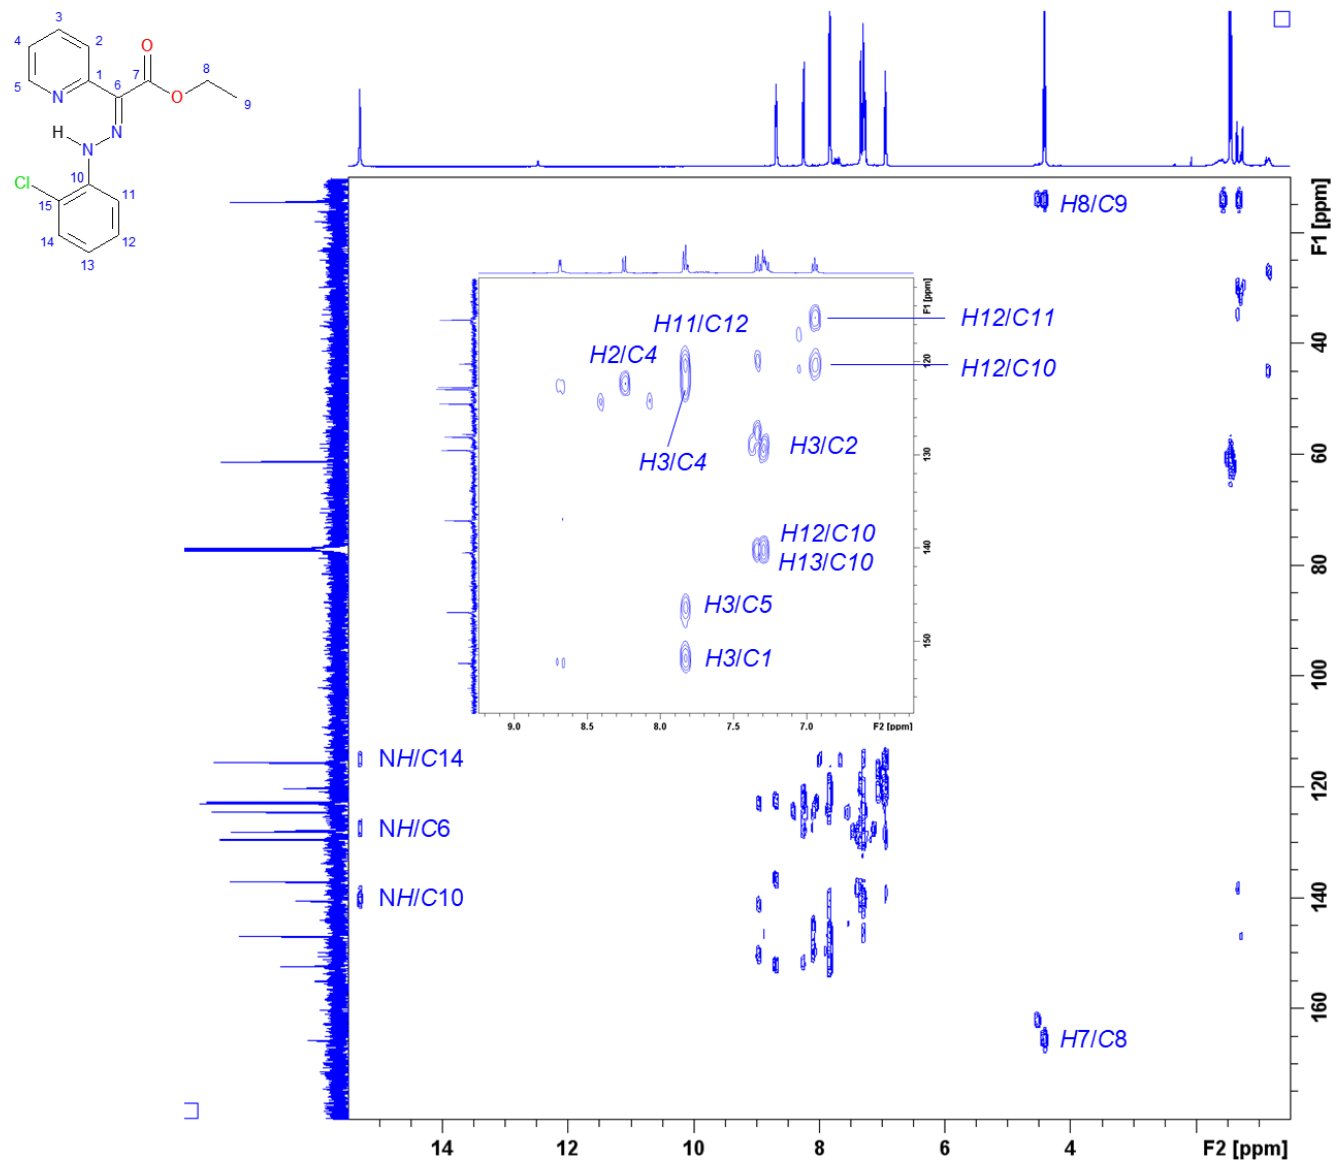

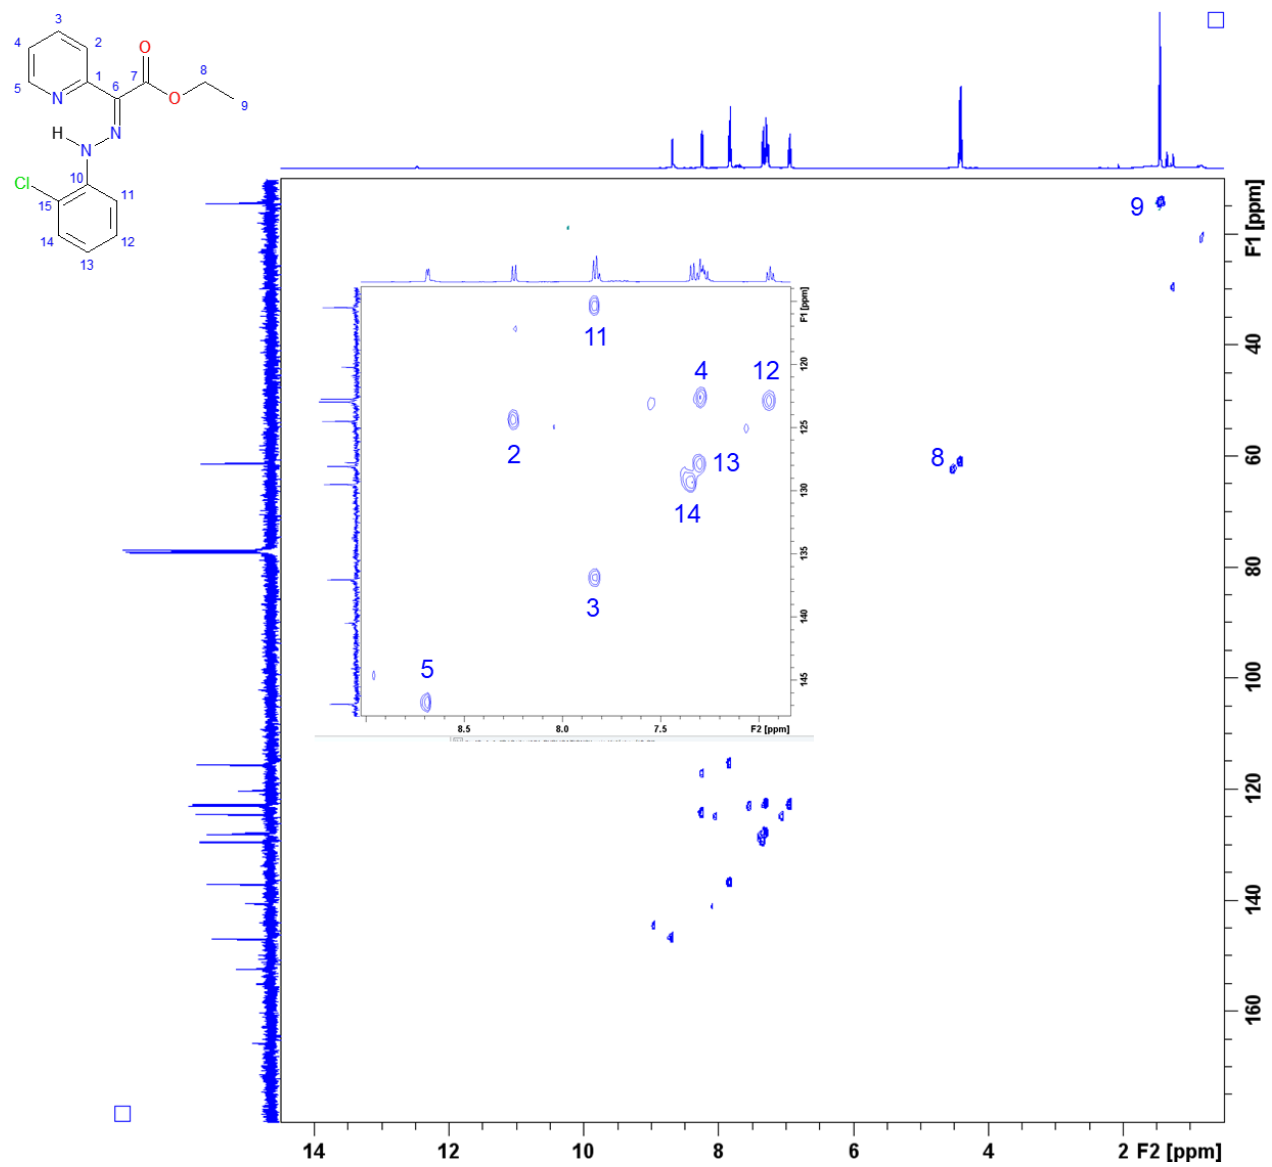

**Figure S12.**  $^{13}\text{C}$ - $^1\text{H}$  HSQC correlation chart of **2-Cl**,  $\text{CDCl}_3$ , 125 MHz-500 MHz, 298 K.

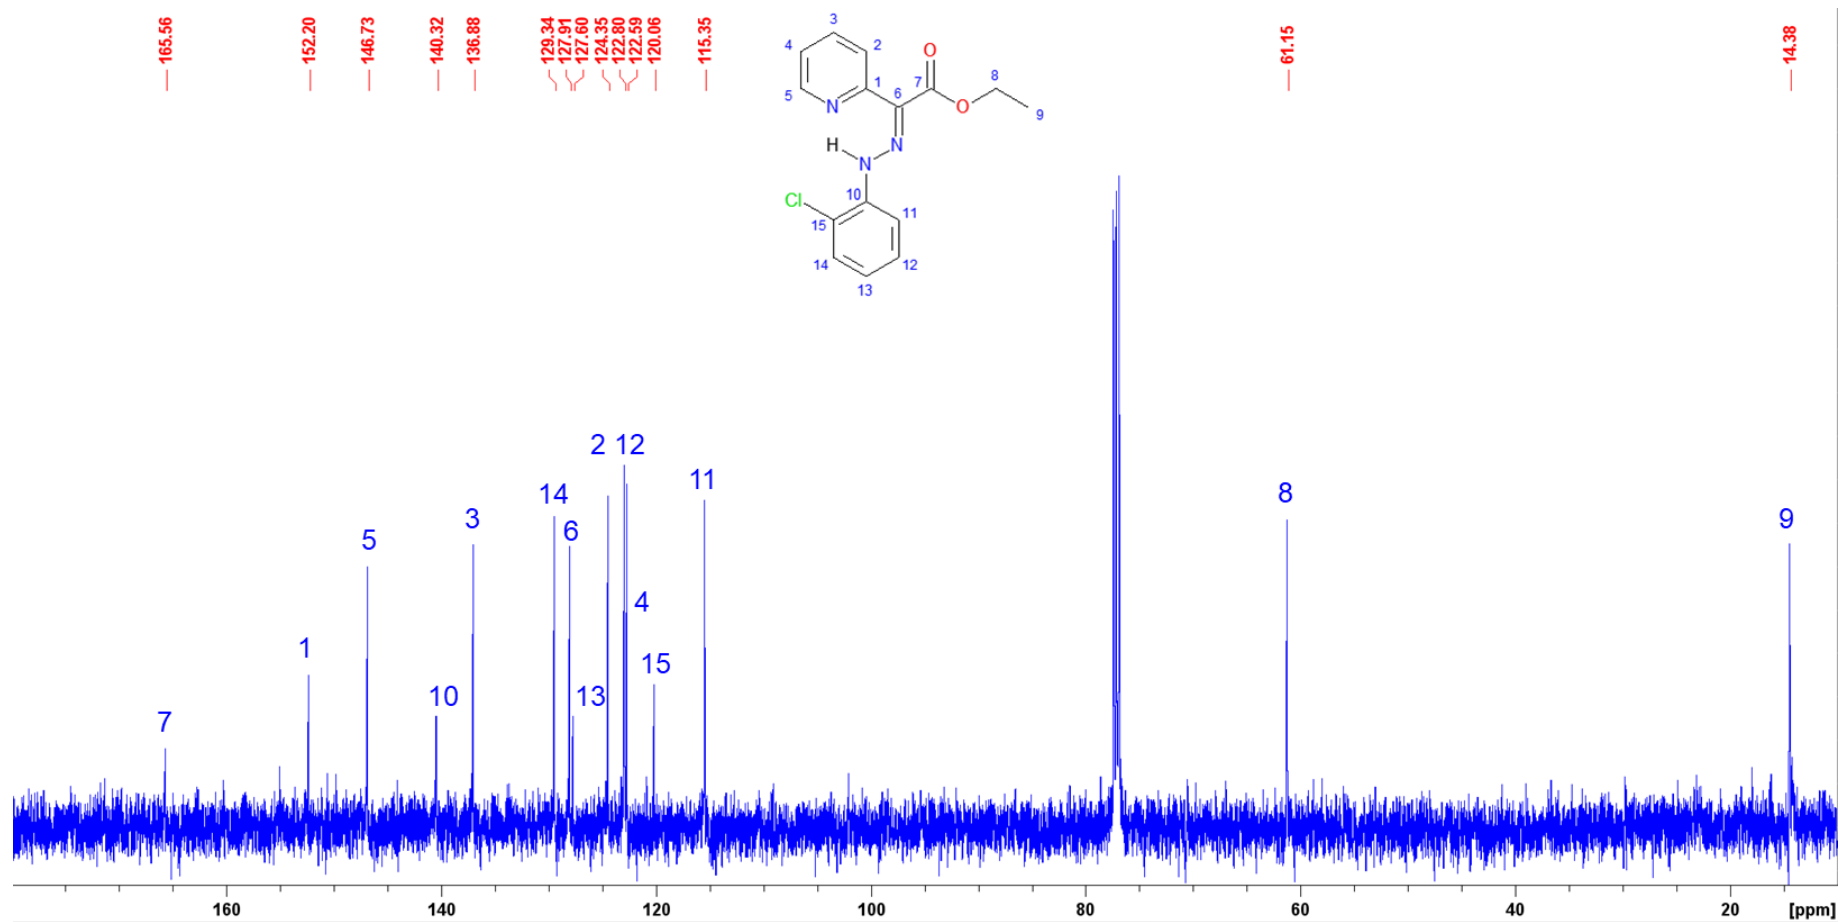

Figure S13. <sup>13</sup>C NMR spectrum of 2-Cl, CDCl<sub>3</sub>, 125 MHz, 298 K.



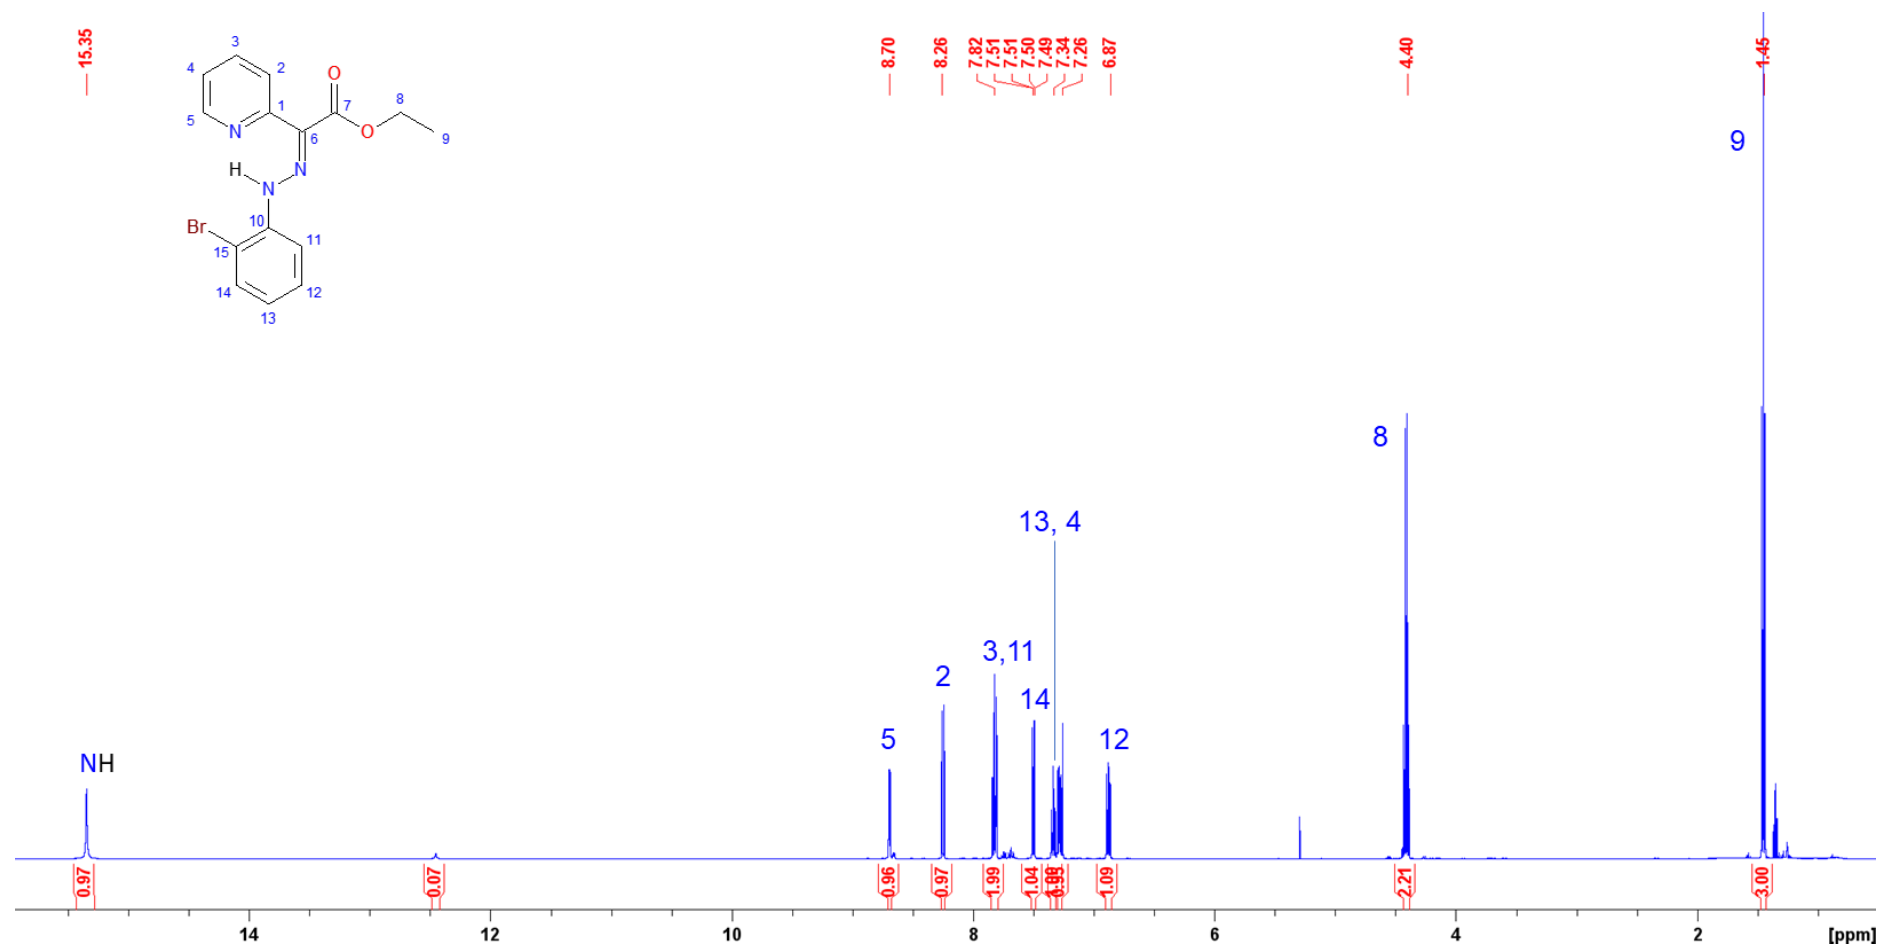

Figure S14. <sup>1</sup>H NMR spectrum of 2-Br, CDCl<sub>3</sub>, 500 MHz, 298 K.

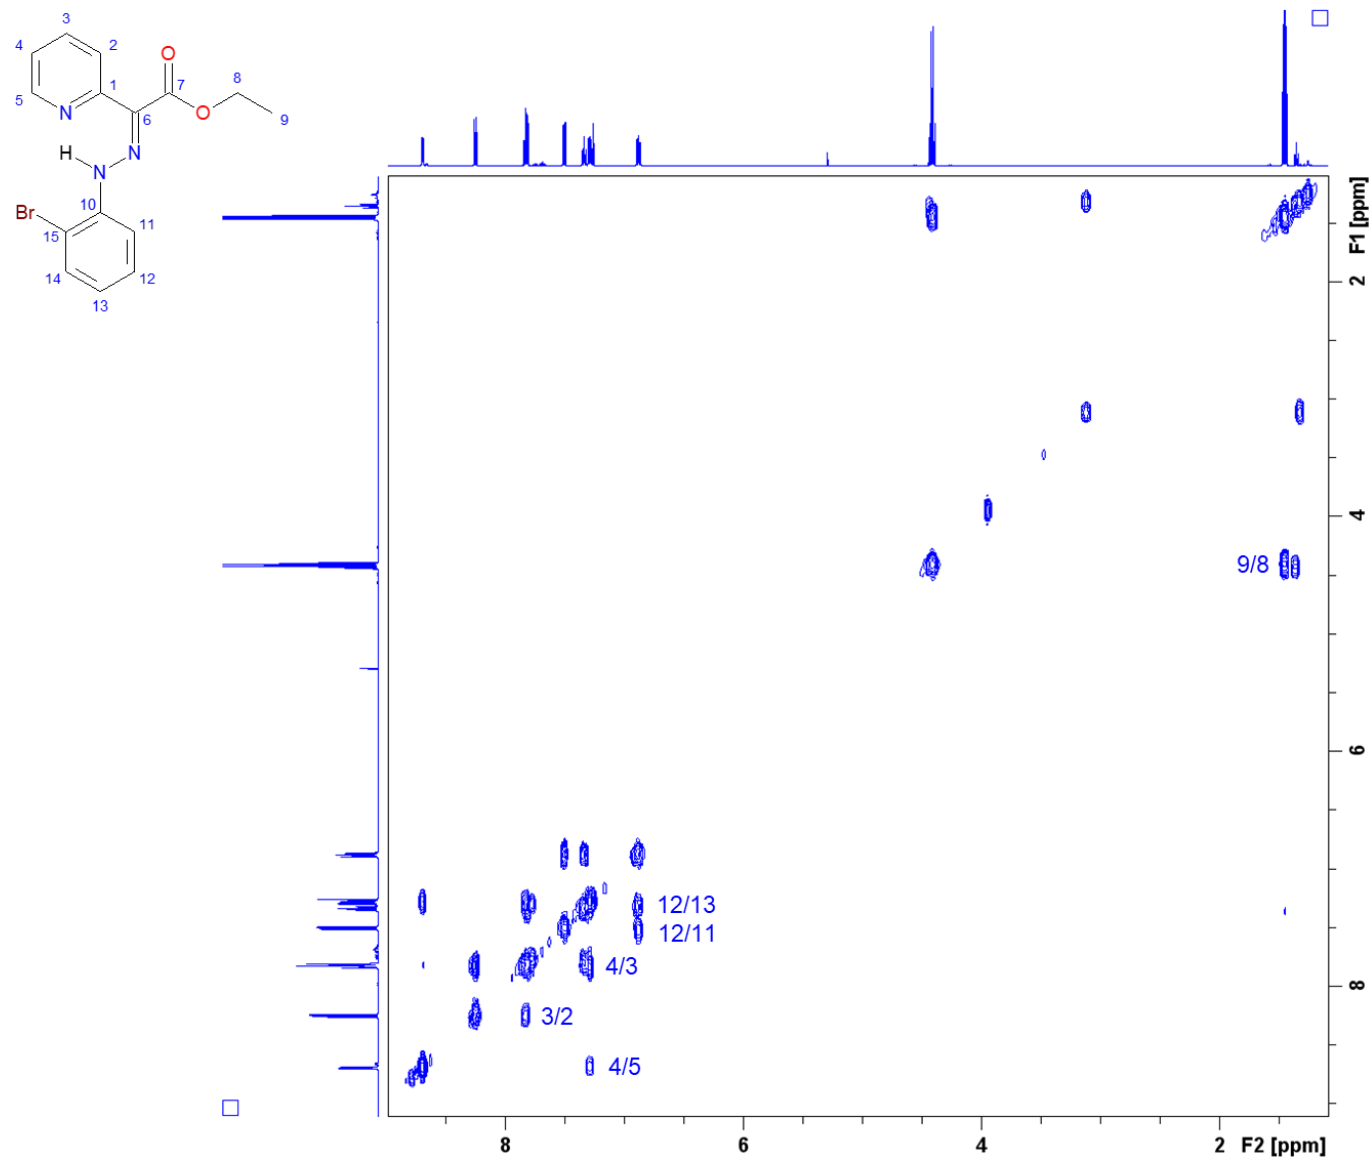

**Figure S15.**  $^1\text{H}$ - $^1\text{H}$  COSY correlation chart of **2-Br**,  $\text{CDCl}_3$ , 500 MHz, 298 K.

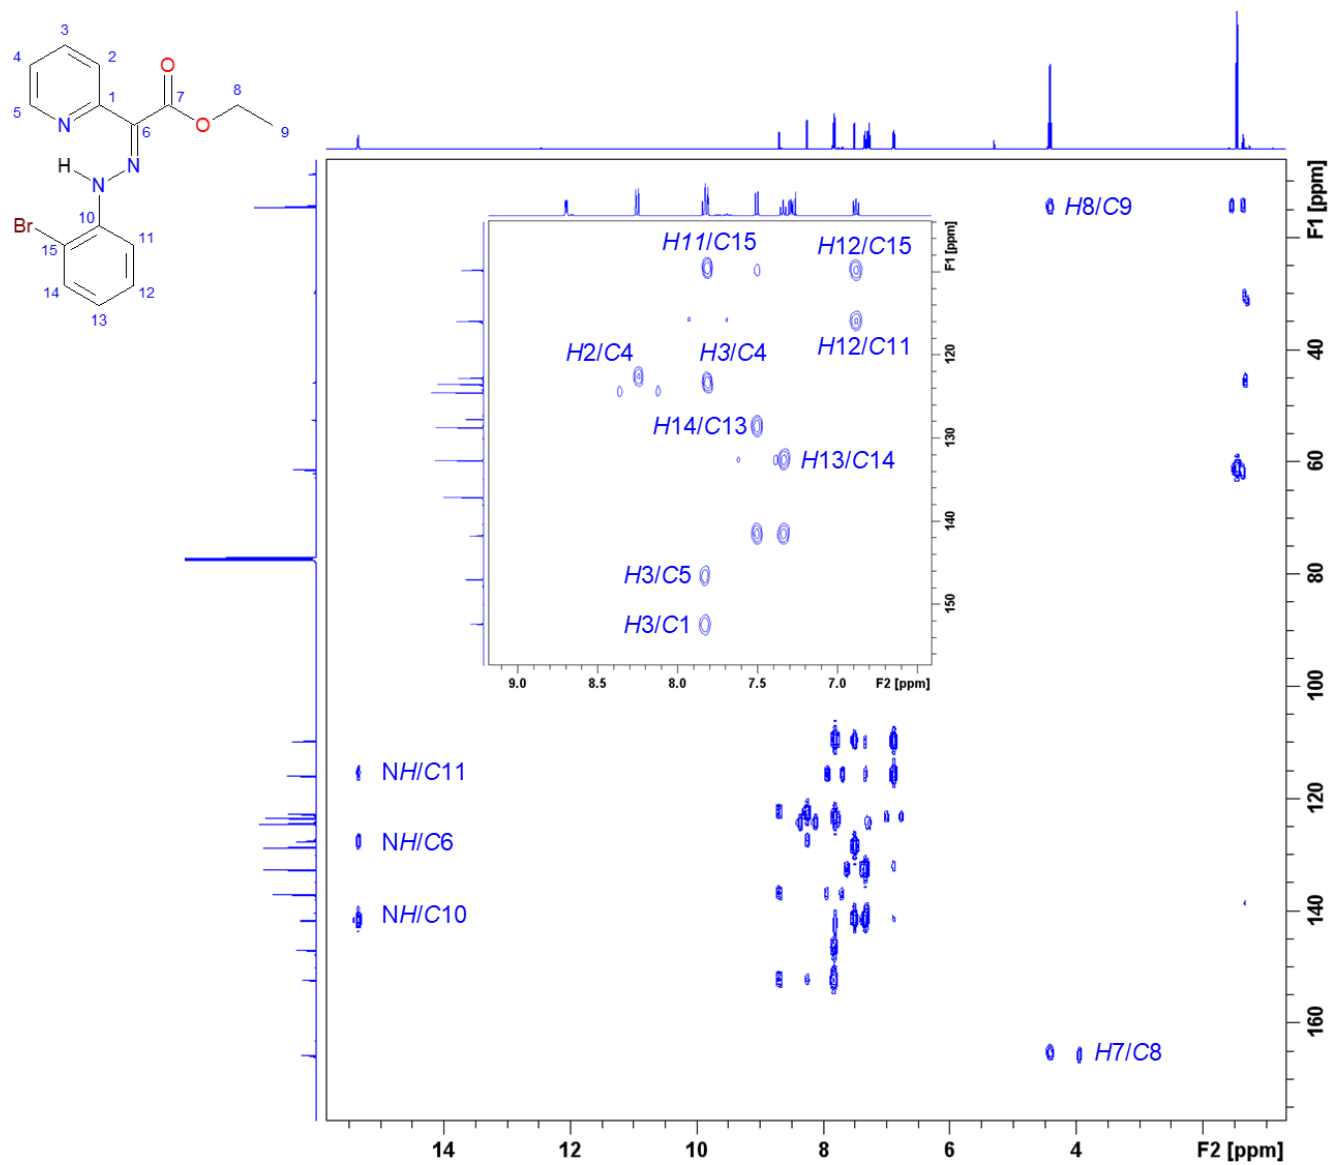

**Figure S16.**  $^{13}\text{C}$ - $^1\text{H}$  HMBC correlation chart of **2-Br**,  $\text{CDCl}_3$ , 125 MHz–500 MHz, 298 K.

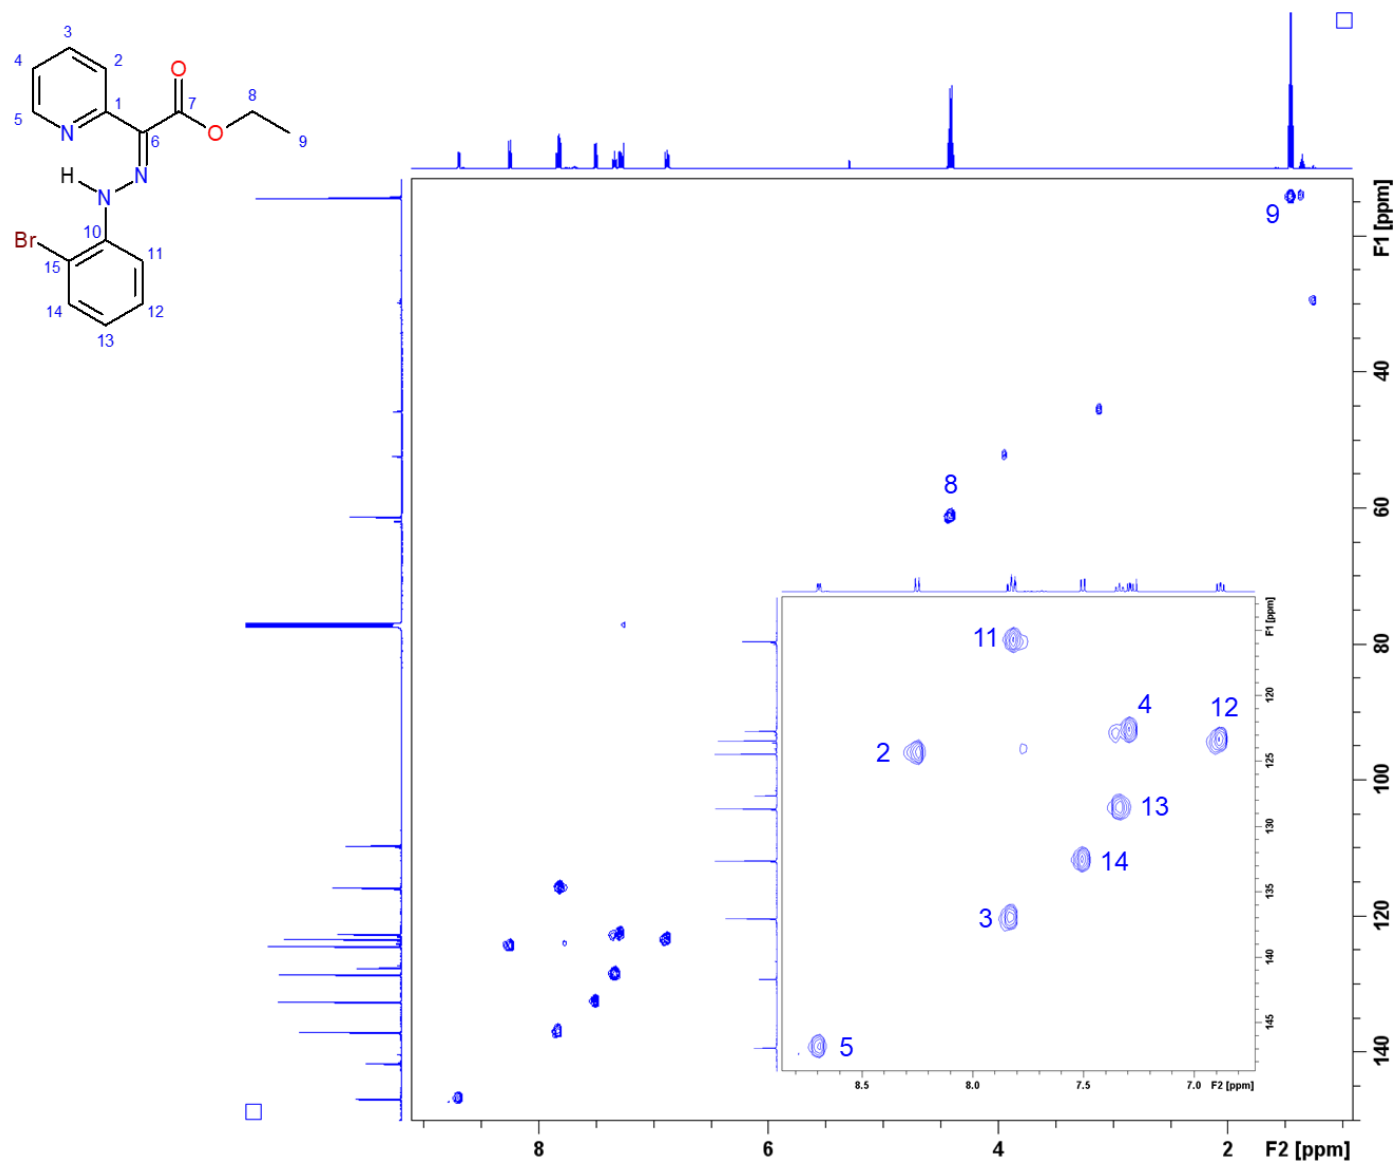

Figure S17.  $^{13}\text{C}$ - $^1\text{H}$  HSQC correlation chart of 2-Br,  $\text{CDCl}_3$ , 125 MHz-500 MHz, 298 K.

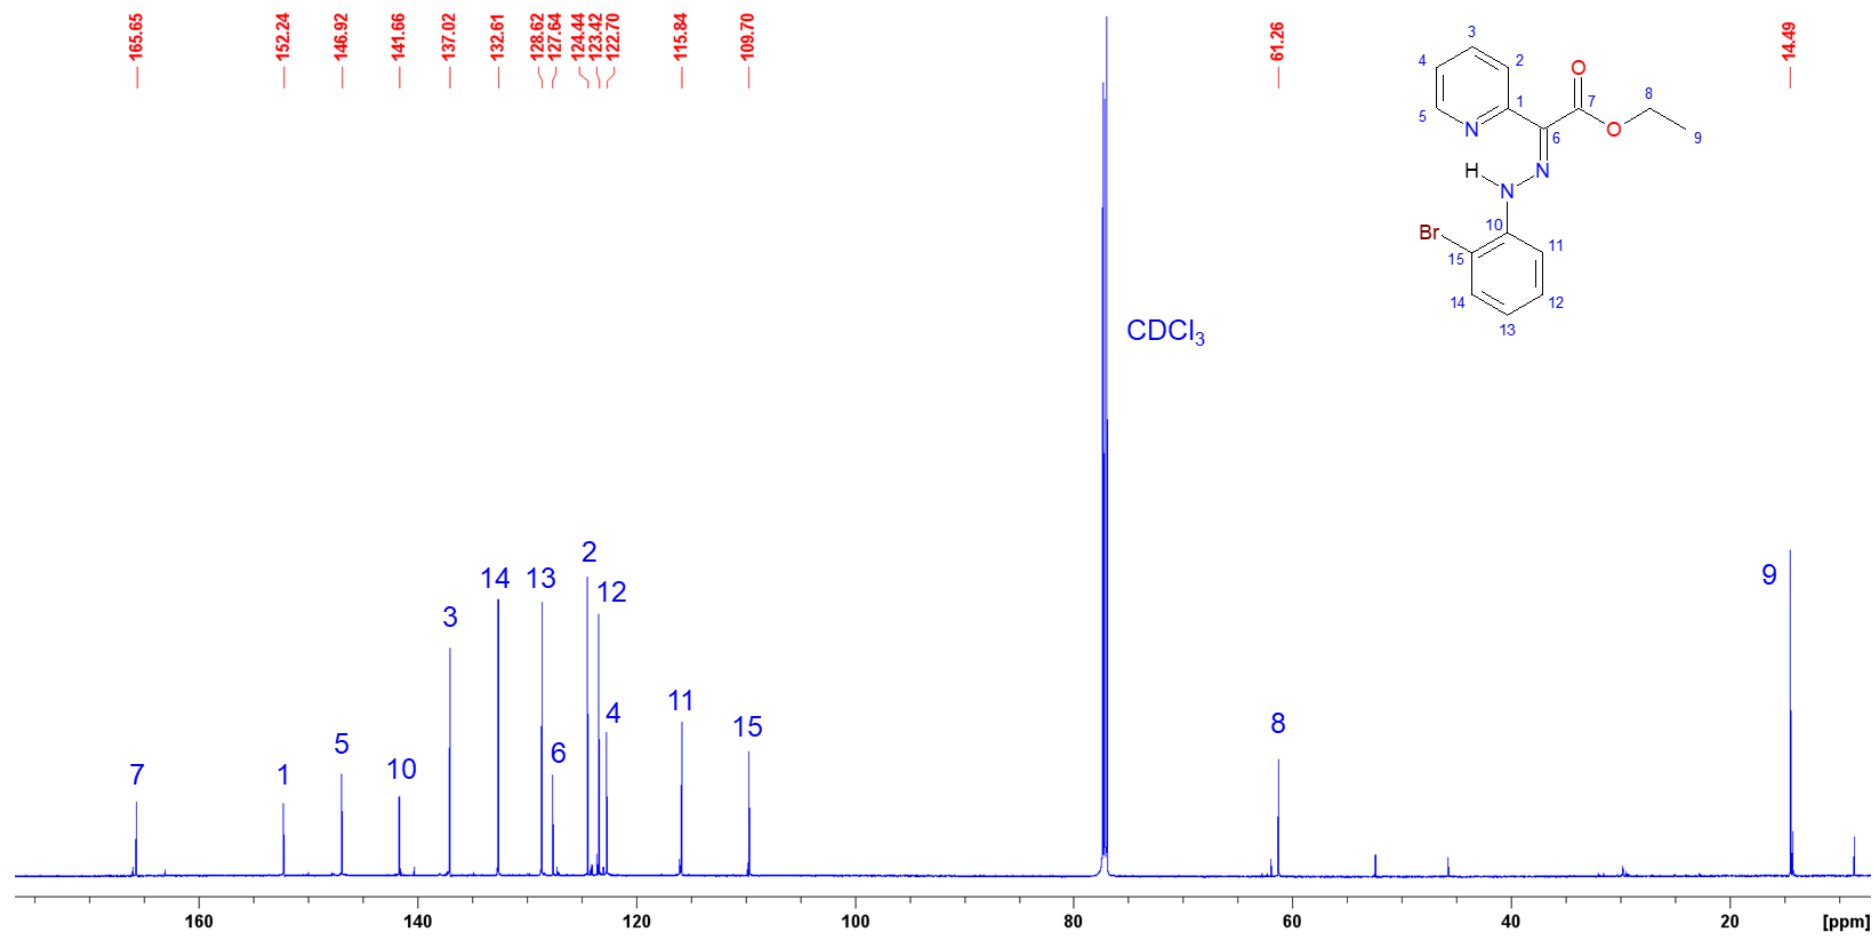

Figure S18.  $^{13}\text{C}$  NMR spectrum of 2-Br,  $\text{CDCl}_3$ , 125 MHz, 298 K.

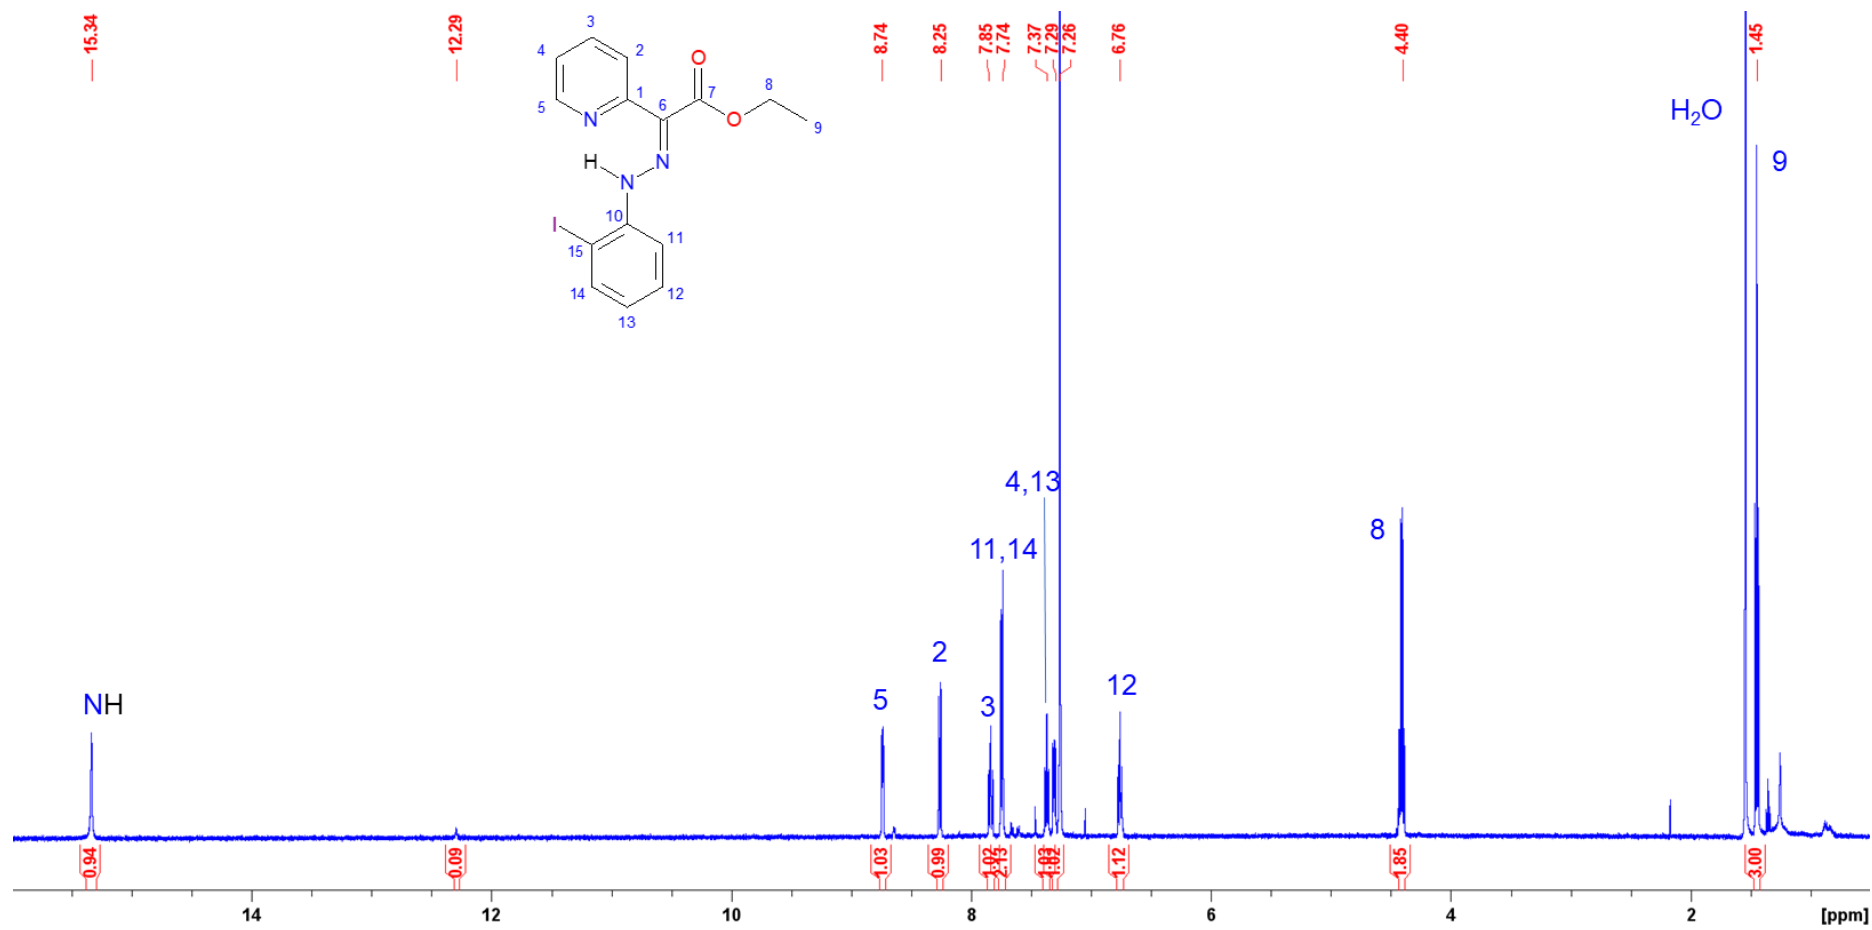

Figure S19. <sup>1</sup>H NMR spectrum of 2-I, CDCl<sub>3</sub>, 500 MHz, 298 K.

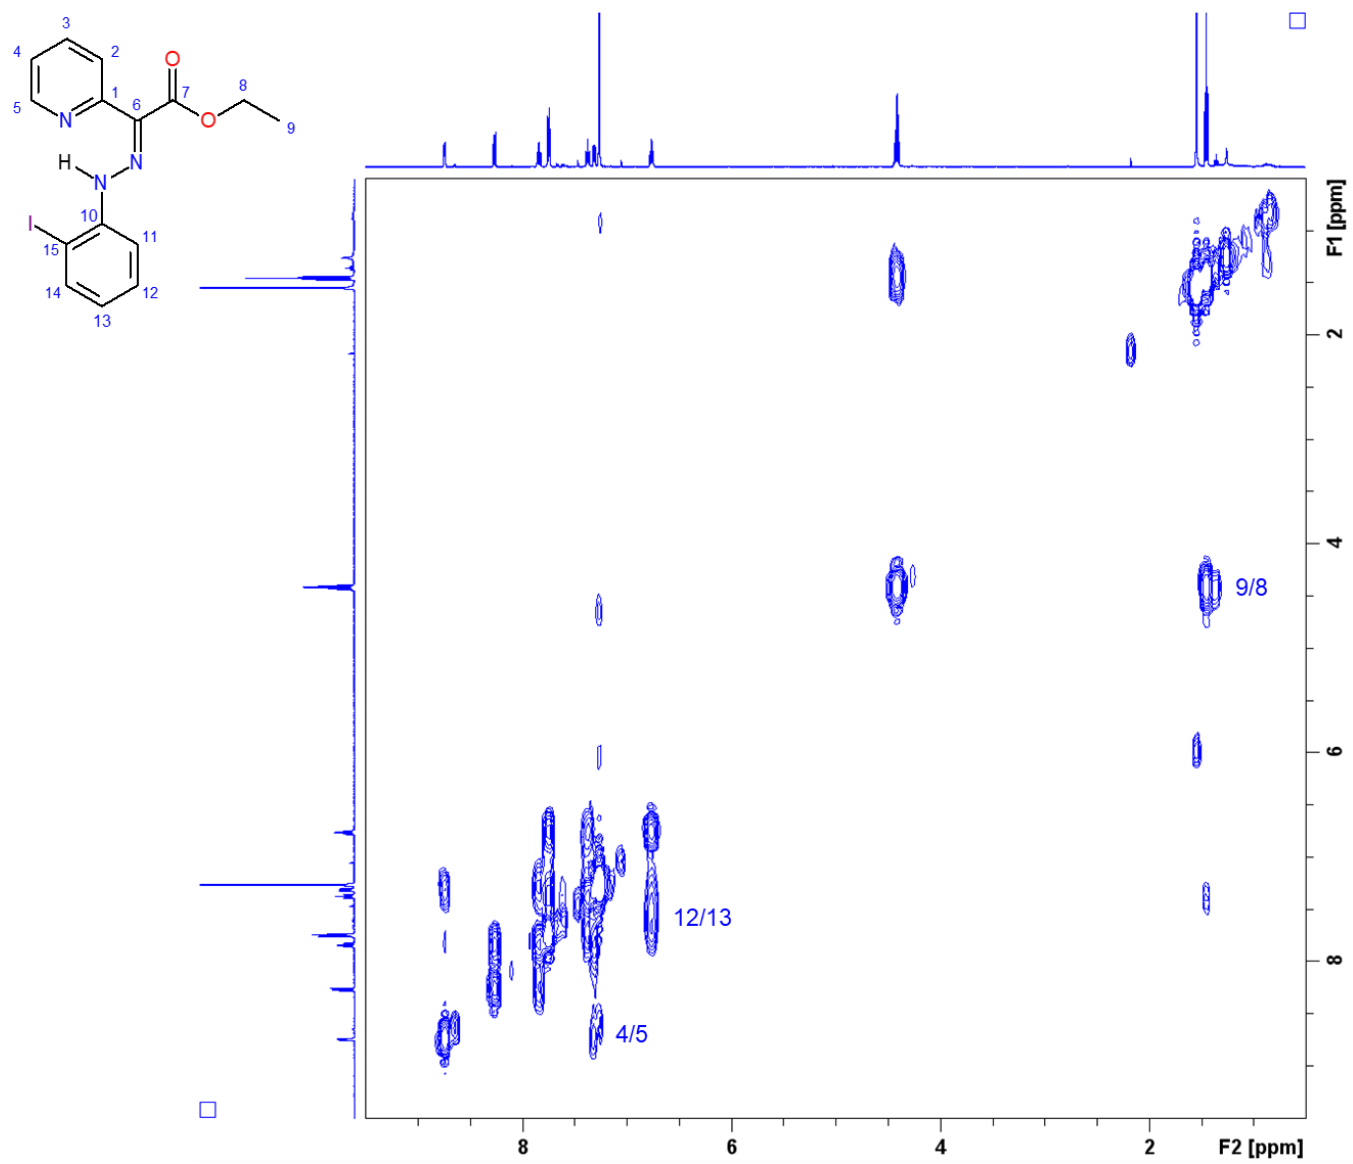

Figure S20.  $^1\text{H}$ - $^1\text{H}$  COSY correlation chart of **2-I**,  $\text{CDCl}_3$ , 500 MHz, 298 K.

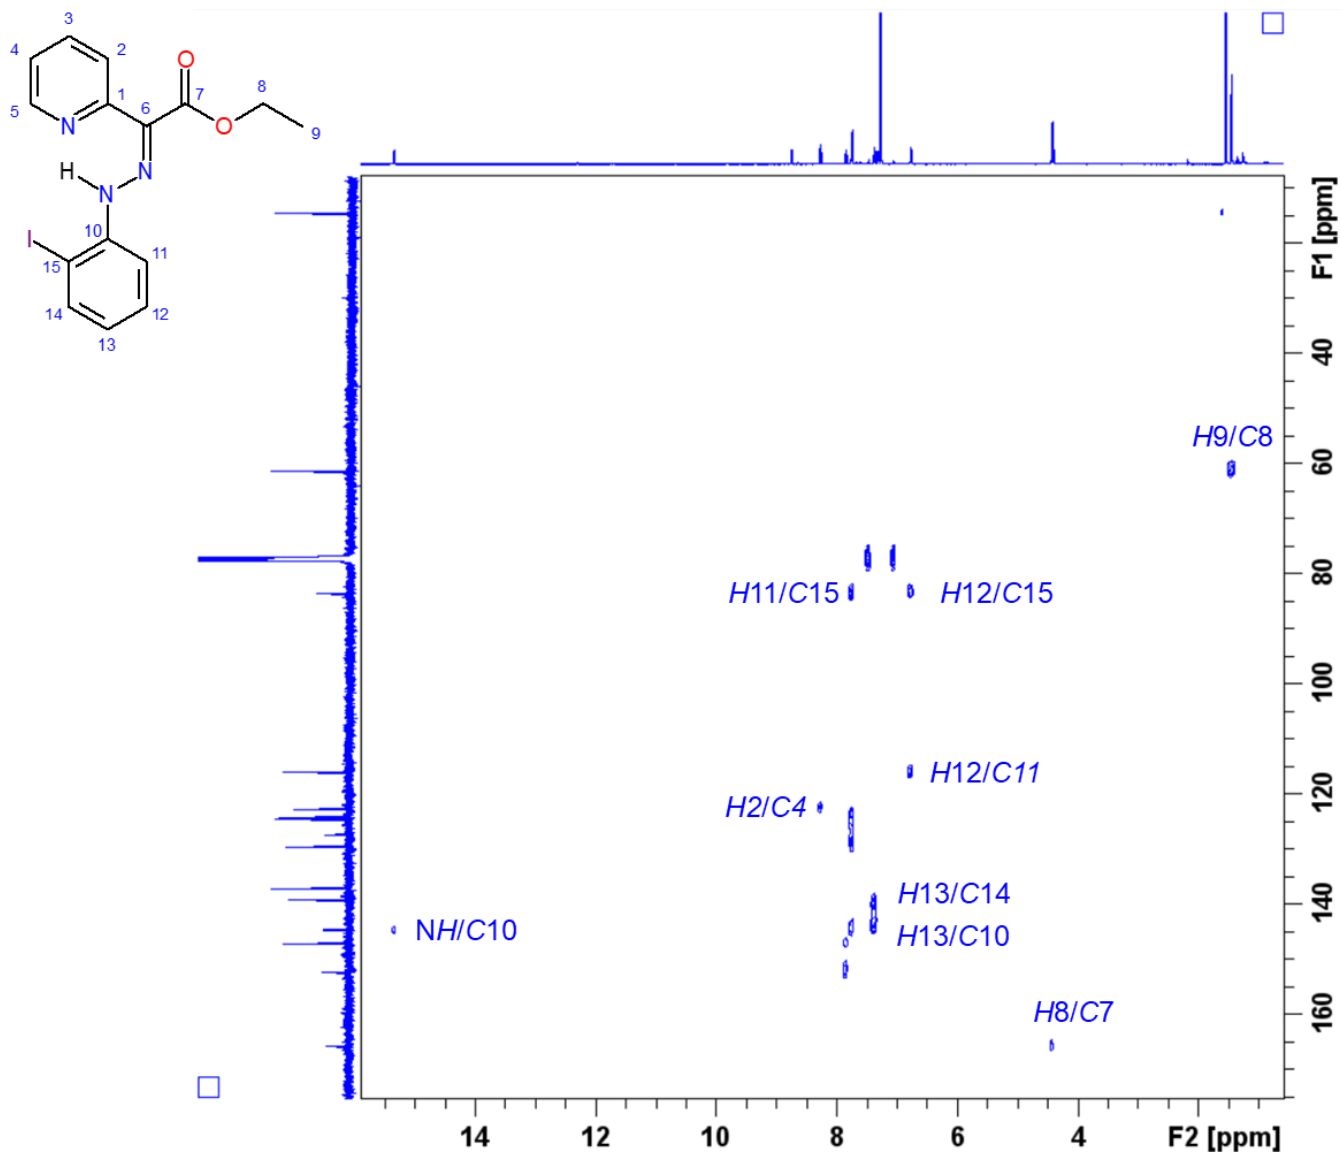

Figure S21.  $^{13}\text{C}$ - $^1\text{H}$  HMBC correlation chart of 2-I,  $\text{CDCl}_3$ , 125 MHz–500 MHz, 298 K.



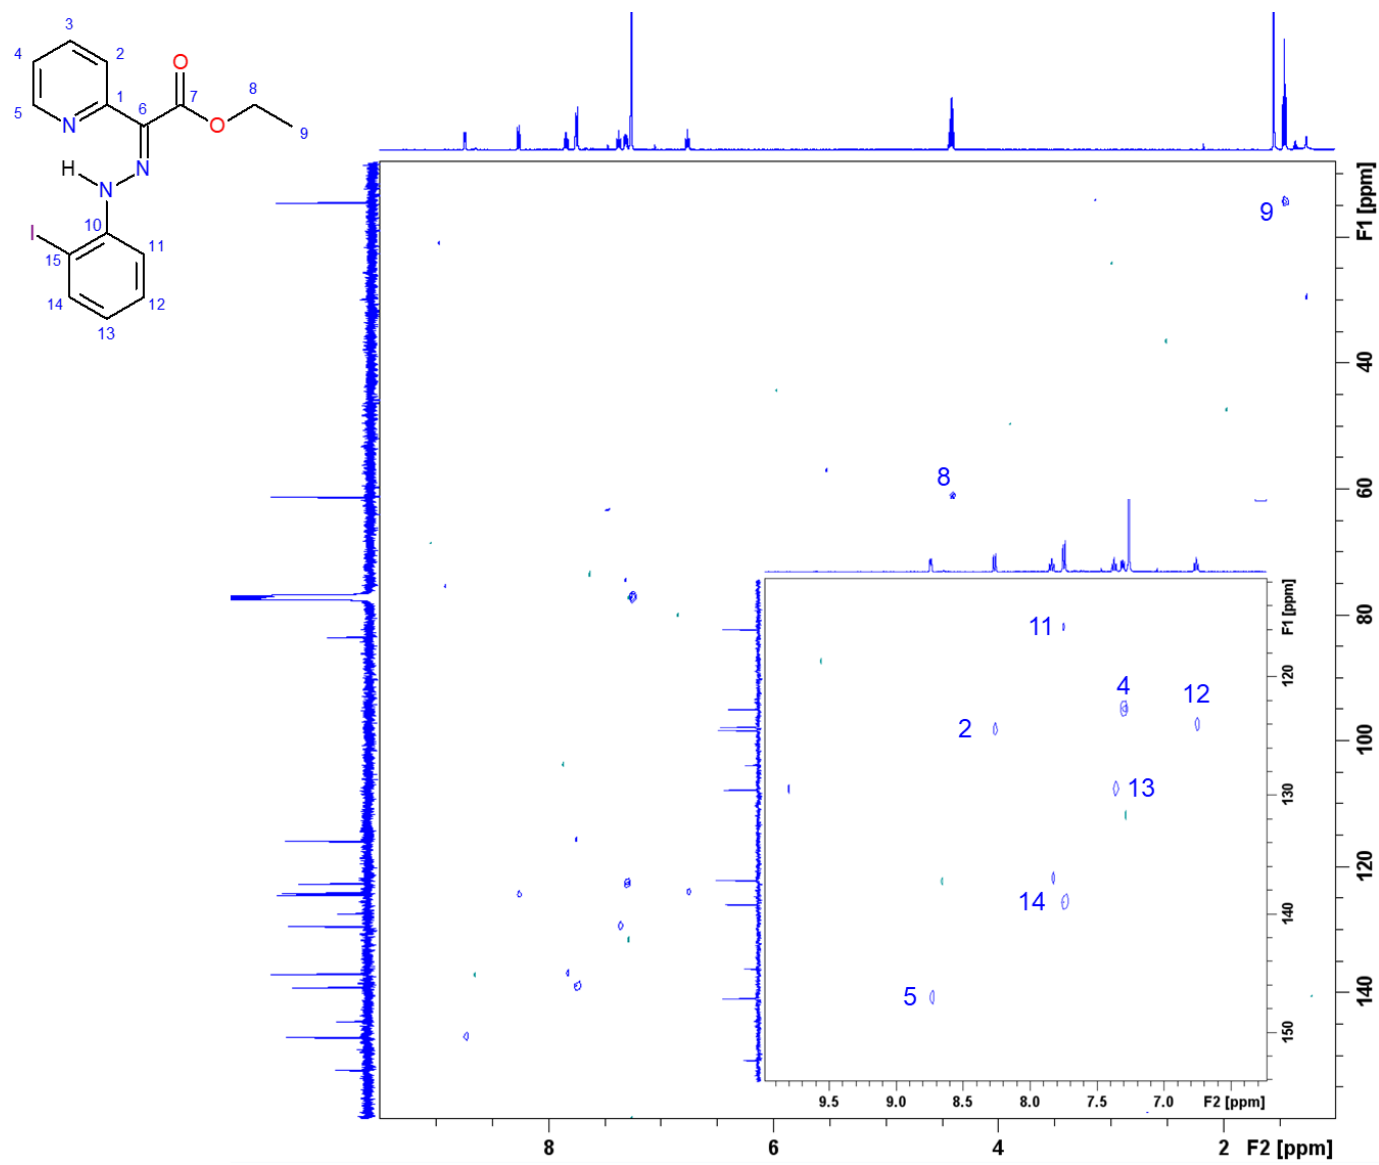

**Figure S22.**  $^{13}\text{C}$ - $^1\text{H}$  HSQC correlation chart of **2-I**,  $\text{CDCl}_3$ , 125 MHz–500 MHz, 298 K.

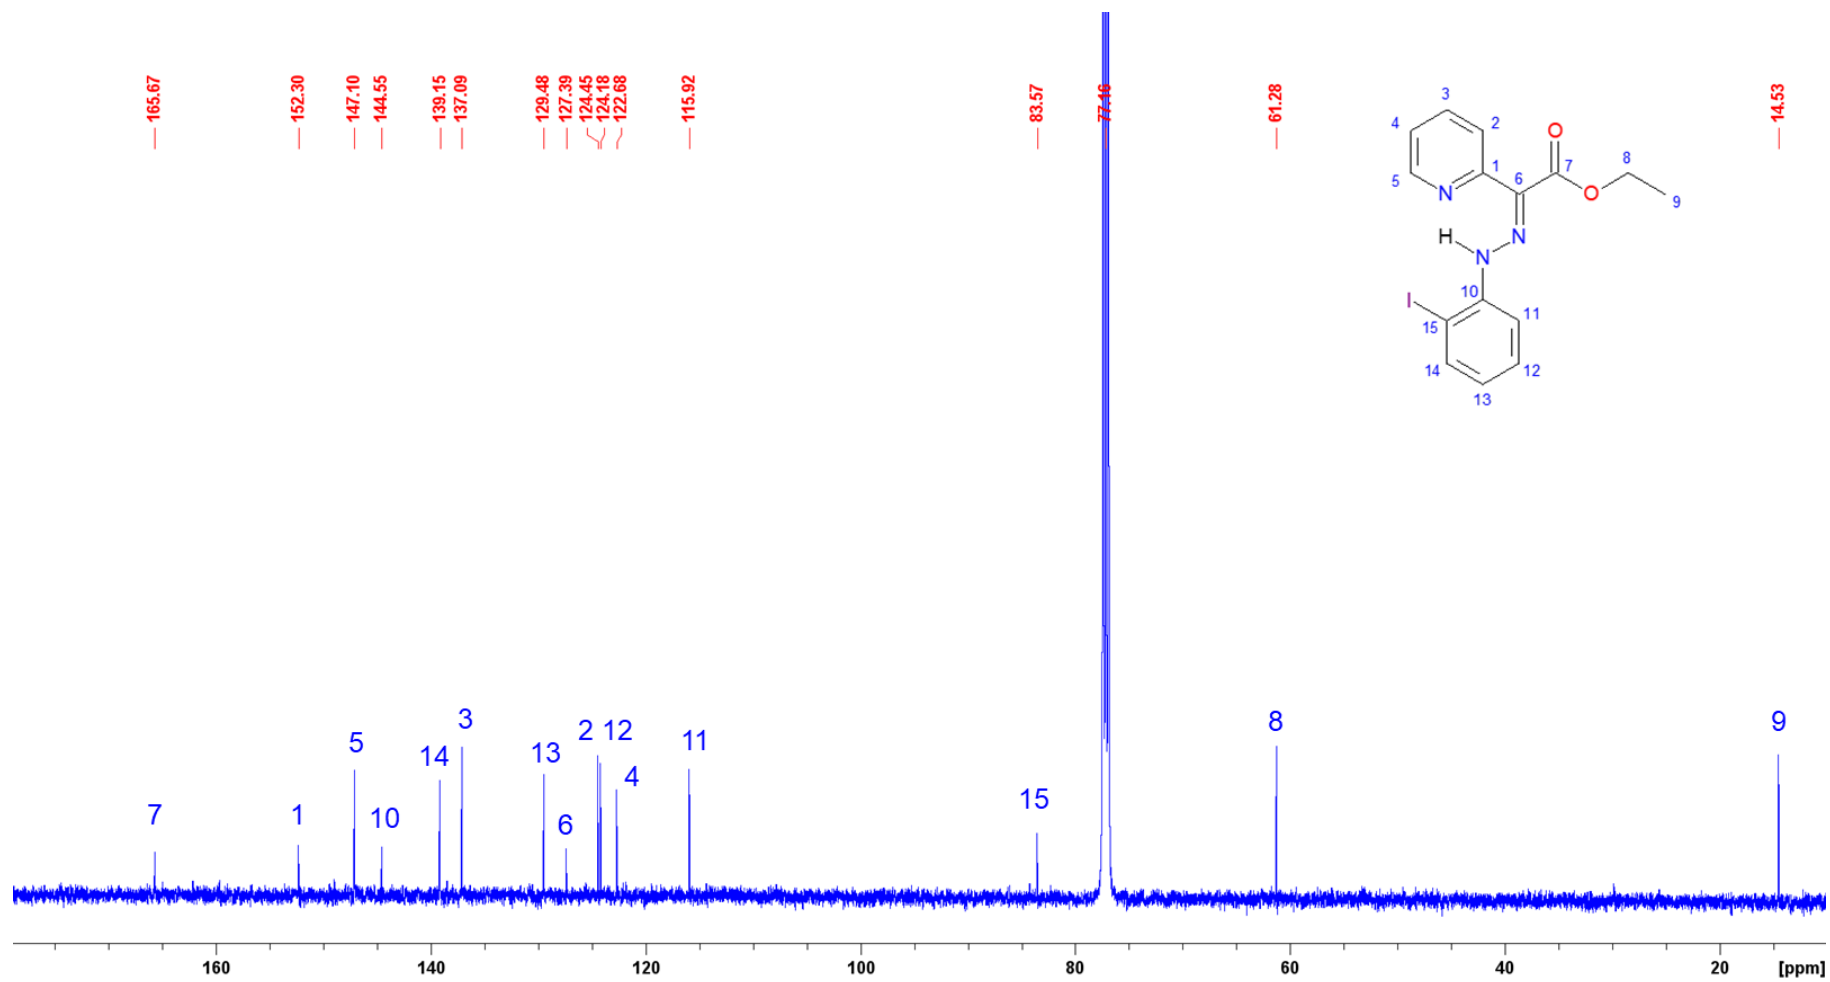

Figure S23.  $^{13}\text{C}$  NMR spectrum of 2-I,  $\text{CDCl}_3$ , 125 MHz, 298 K.

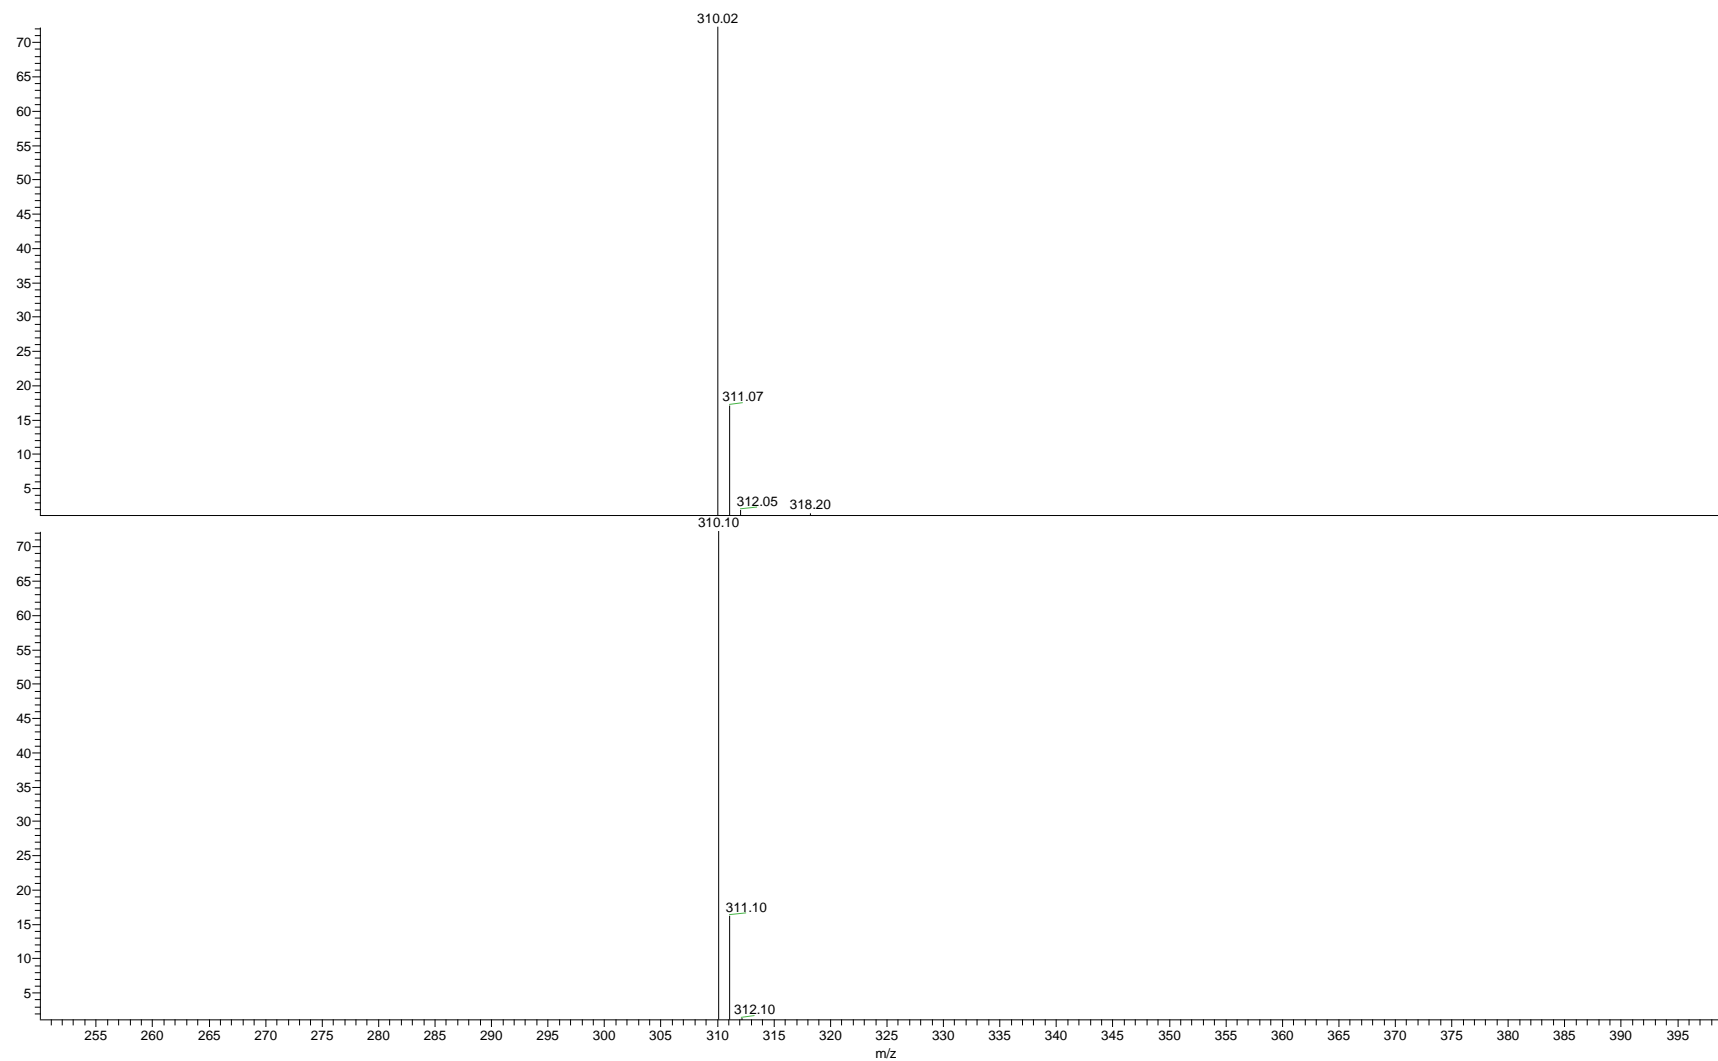

**Figure S24.** MS spectrum of 2-F in MeOH ( $[C_{15}H_{14}N_3O_2F+Na]^+$  ion, top) and simulated spectrum (bottom).

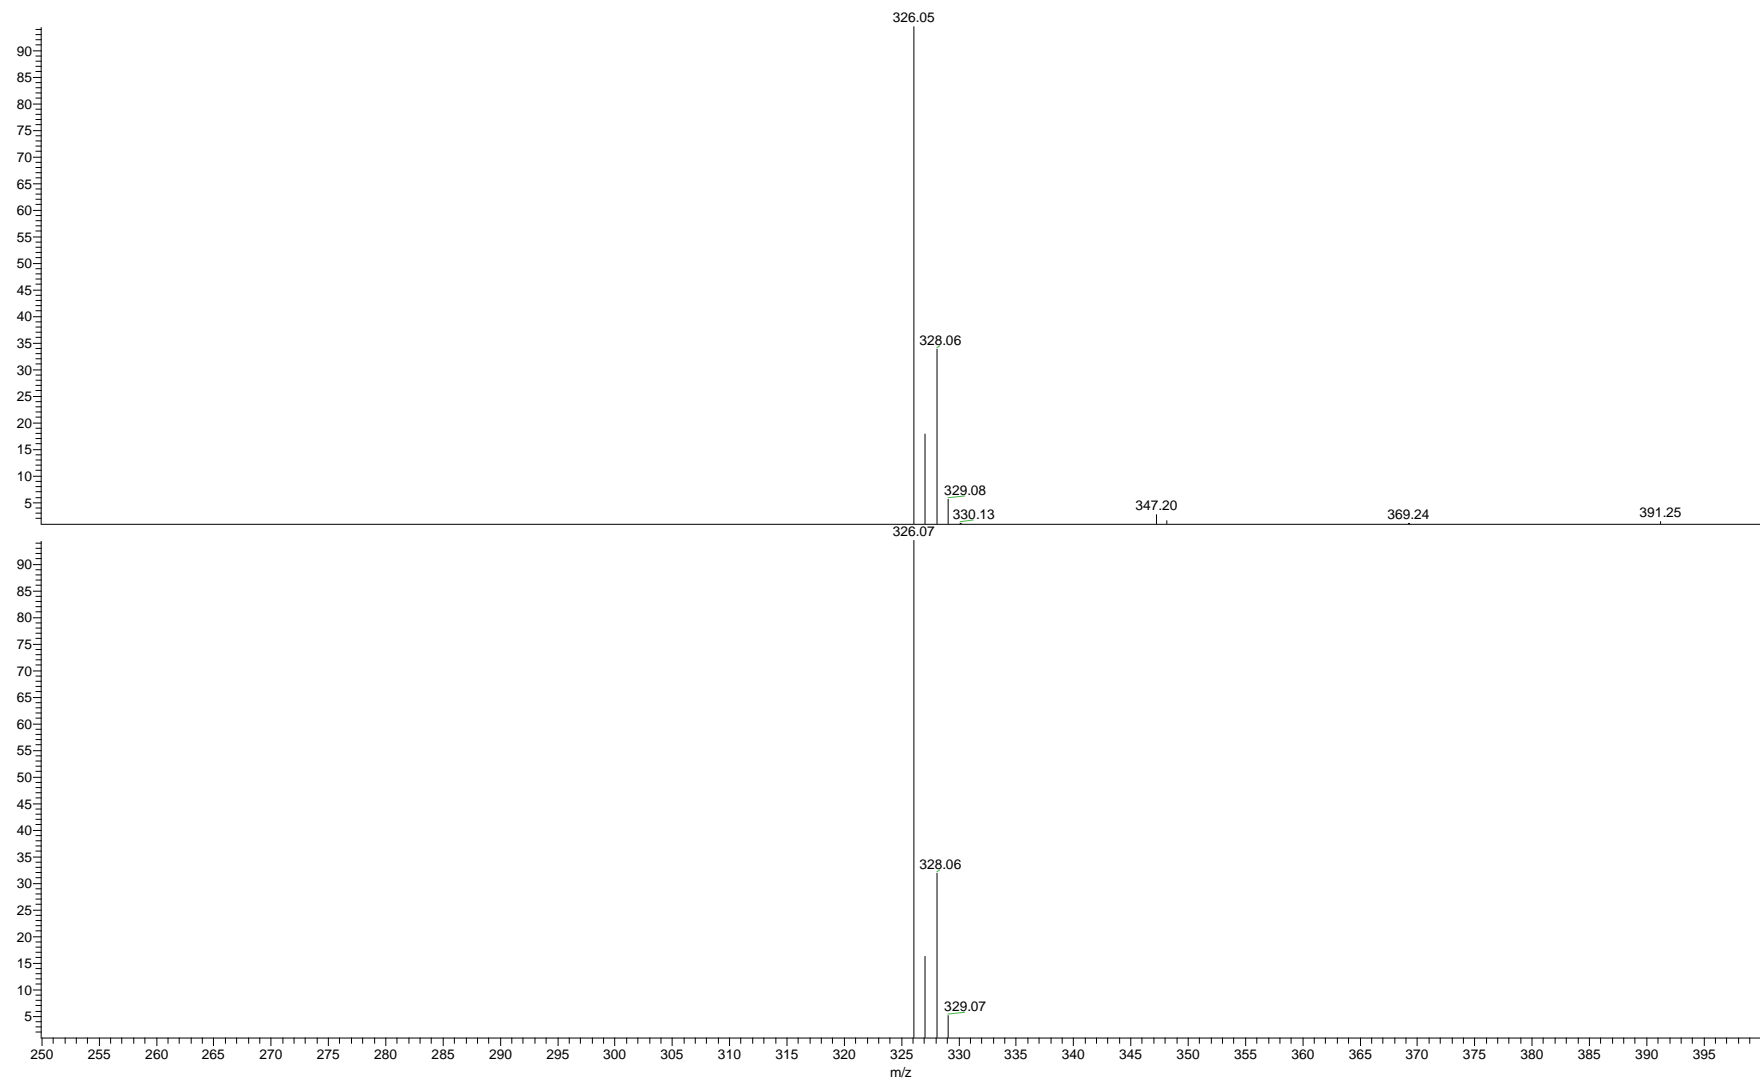

**Figure S25.** MS spectrum of 2-Cl in MeOH ( $[\text{C}_{15}\text{H}_{14}\text{N}_3\text{O}_2\text{Cl}+\text{Na}]^+$  ion, top) and simulated spectrum (bottom).

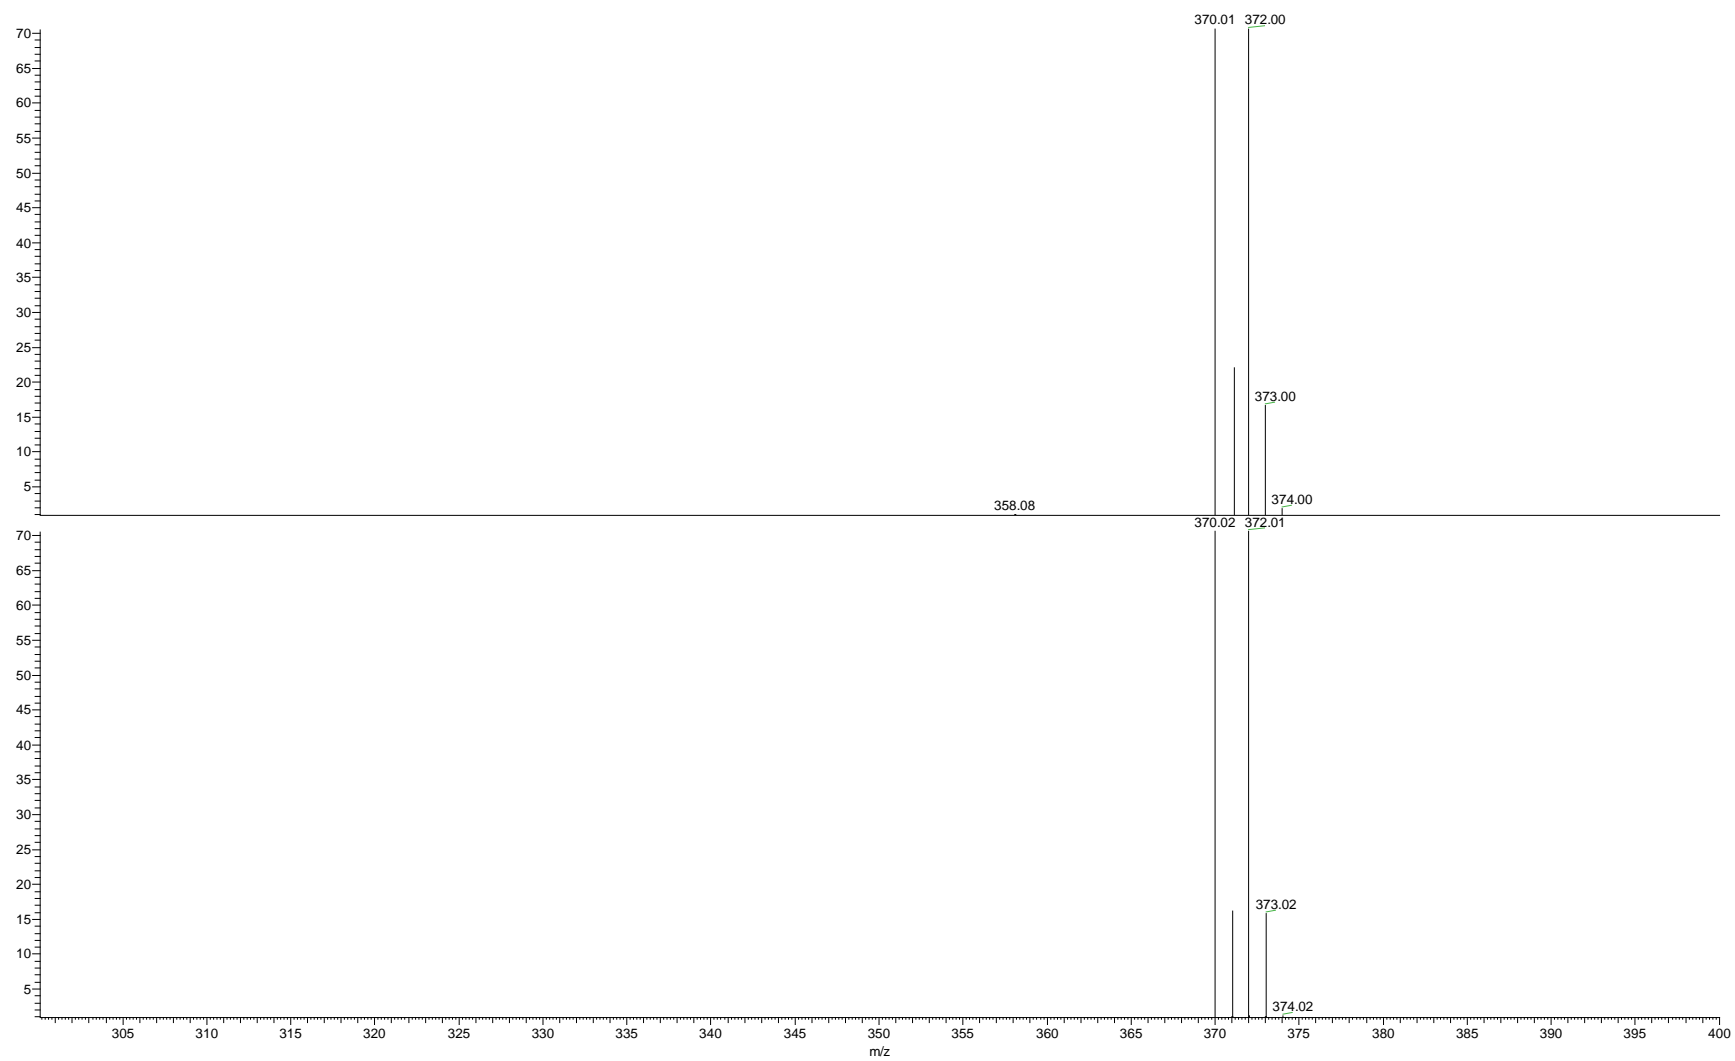

**Figure S26.** MS spectrum of **2-Br** in MeOH ( $[\text{C}_{15}\text{H}_{14}\text{N}_3\text{O}_2\text{Br}+\text{Na}]^+$  ion, top) and simulated spectrum (bottom).

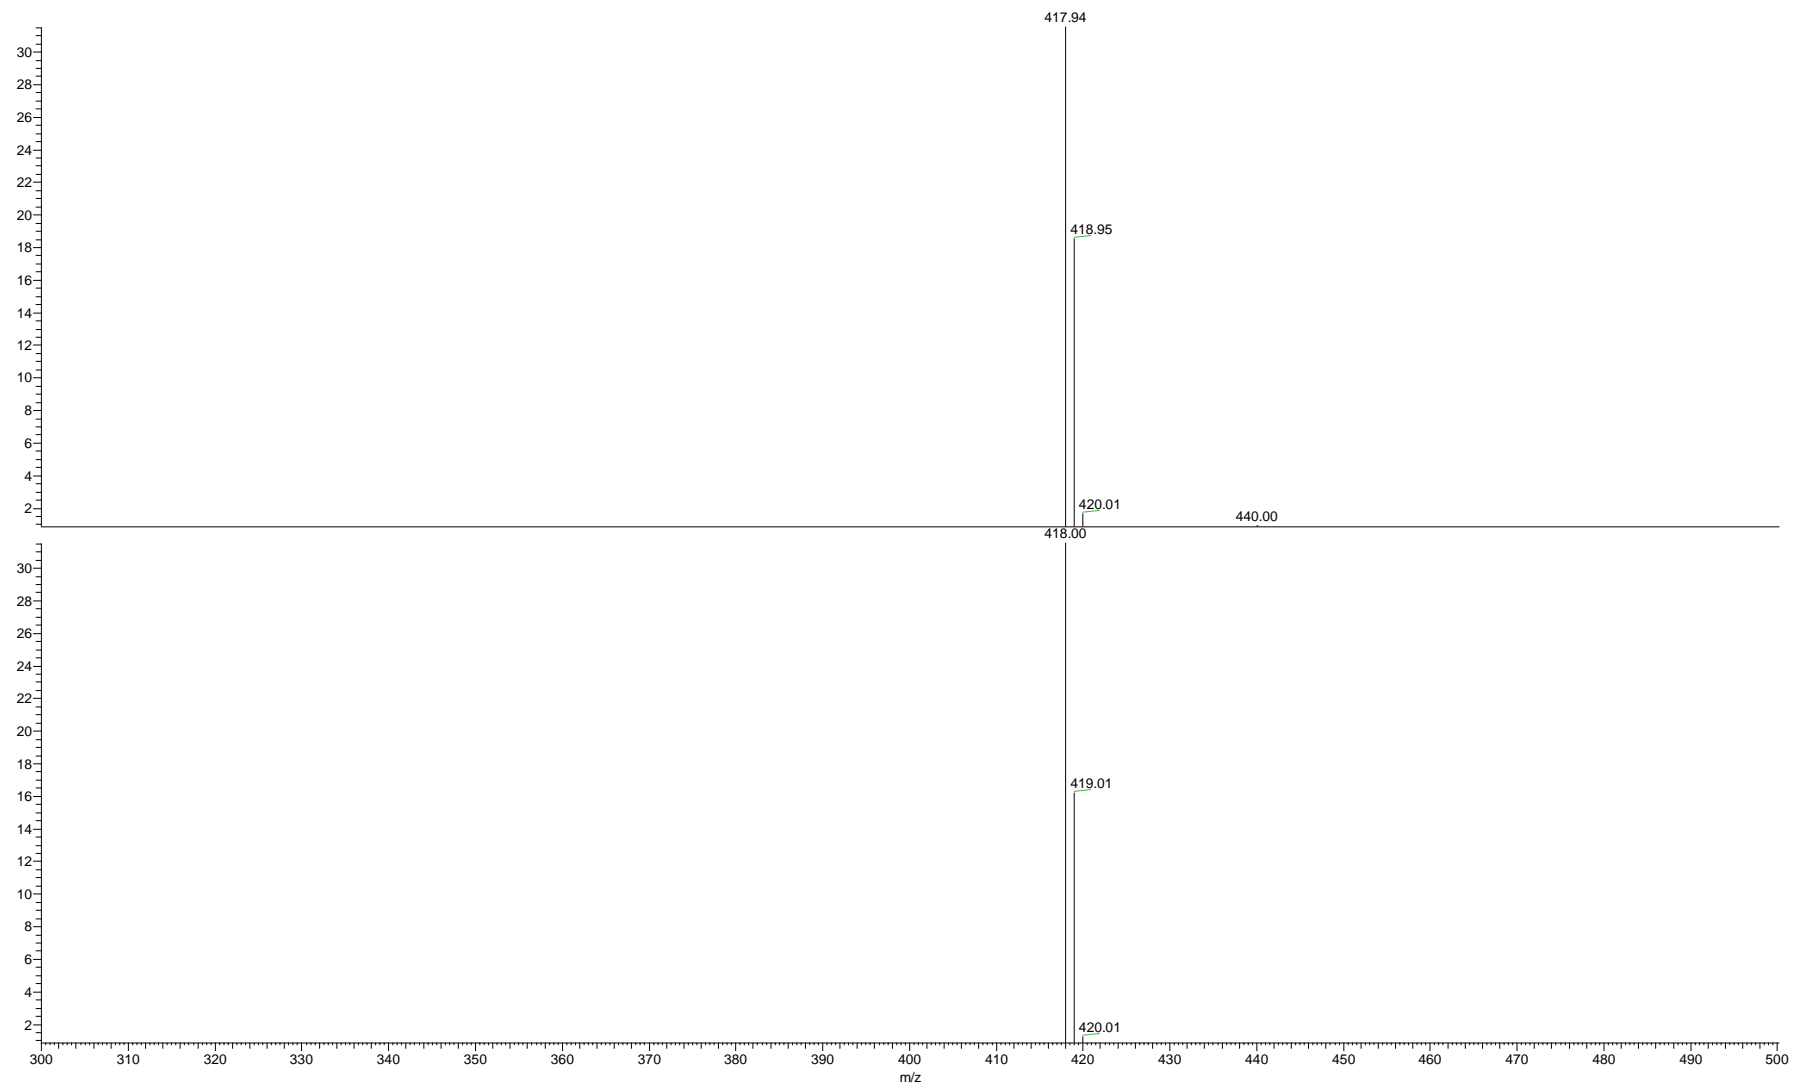

**Figure S27.** MS spectrum of **2-I** in MeOH ( $[C_{15}H_{14}N_3O_2I+Na]^+$  ion, top) and simulated spectrum (bottom).

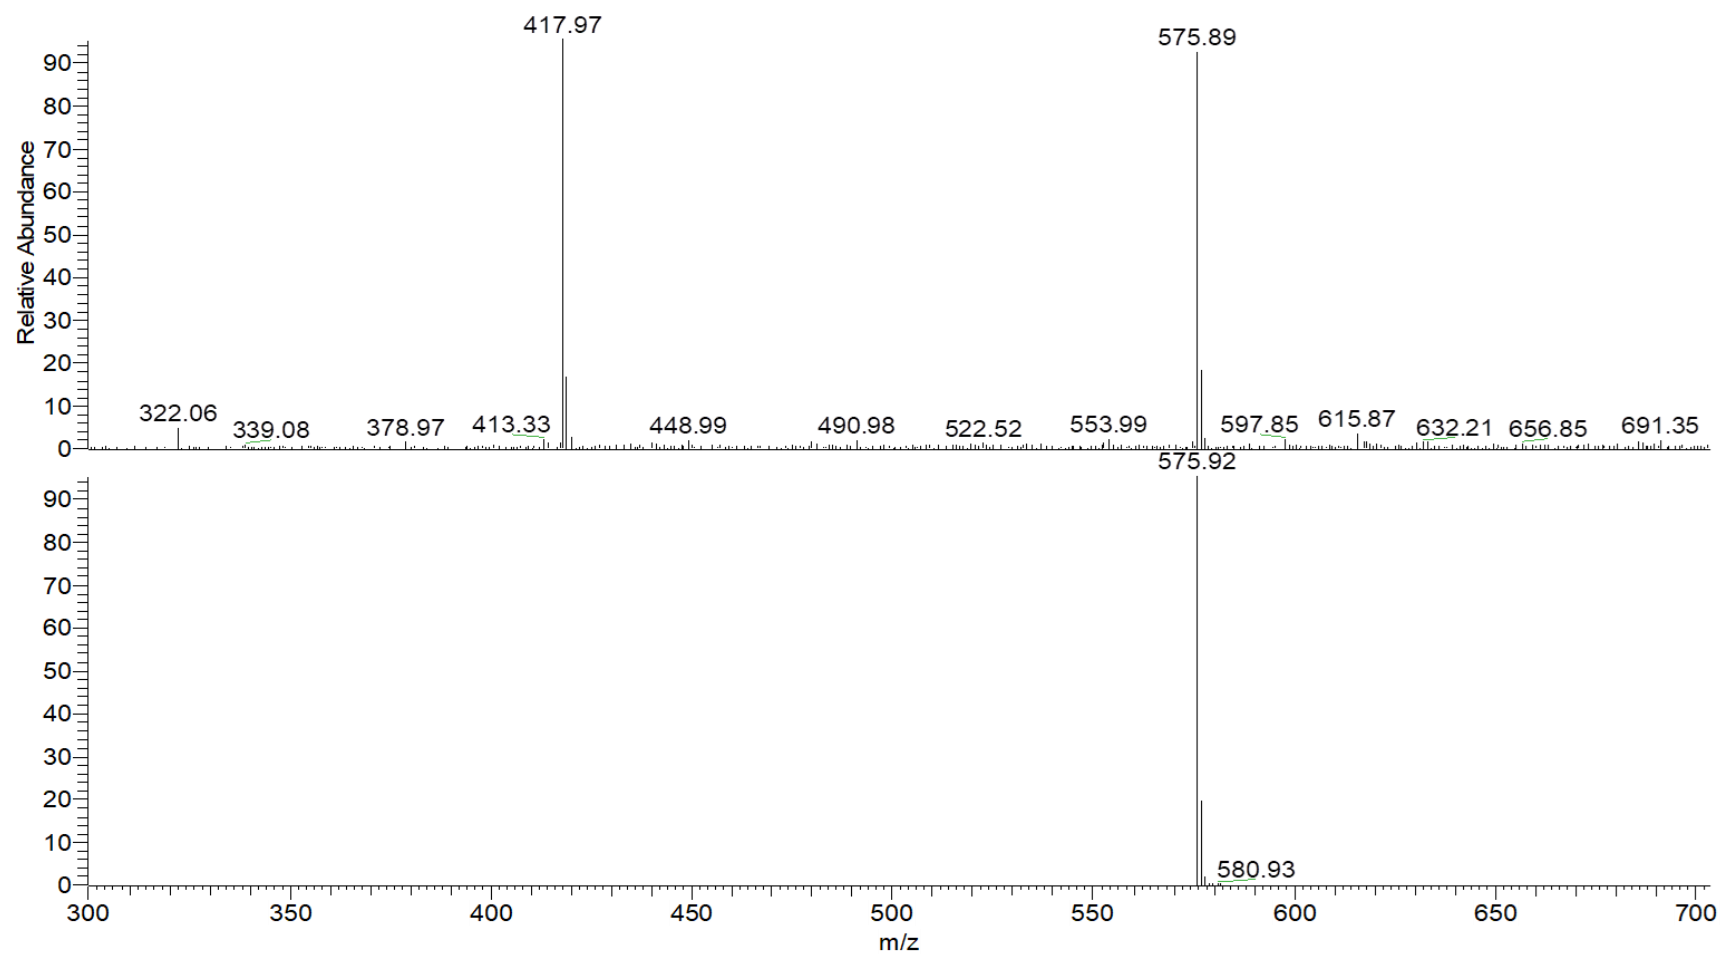

**Figure S28.** Top – MS spectrum of mixture of compounds **2-I** ( $[\text{C}_{15}\text{H}_{14}\text{N}_3\text{O}_2\text{I}+\text{Na}]^+$  ion) and **2-I\_azo** ( $[\text{C}_{18}\text{H}_{13}\text{N}_5\text{I}_2+\text{Na}]^+$  ion) in MeOH. Bottom – simulated spectrum for **2-I\_azo**.

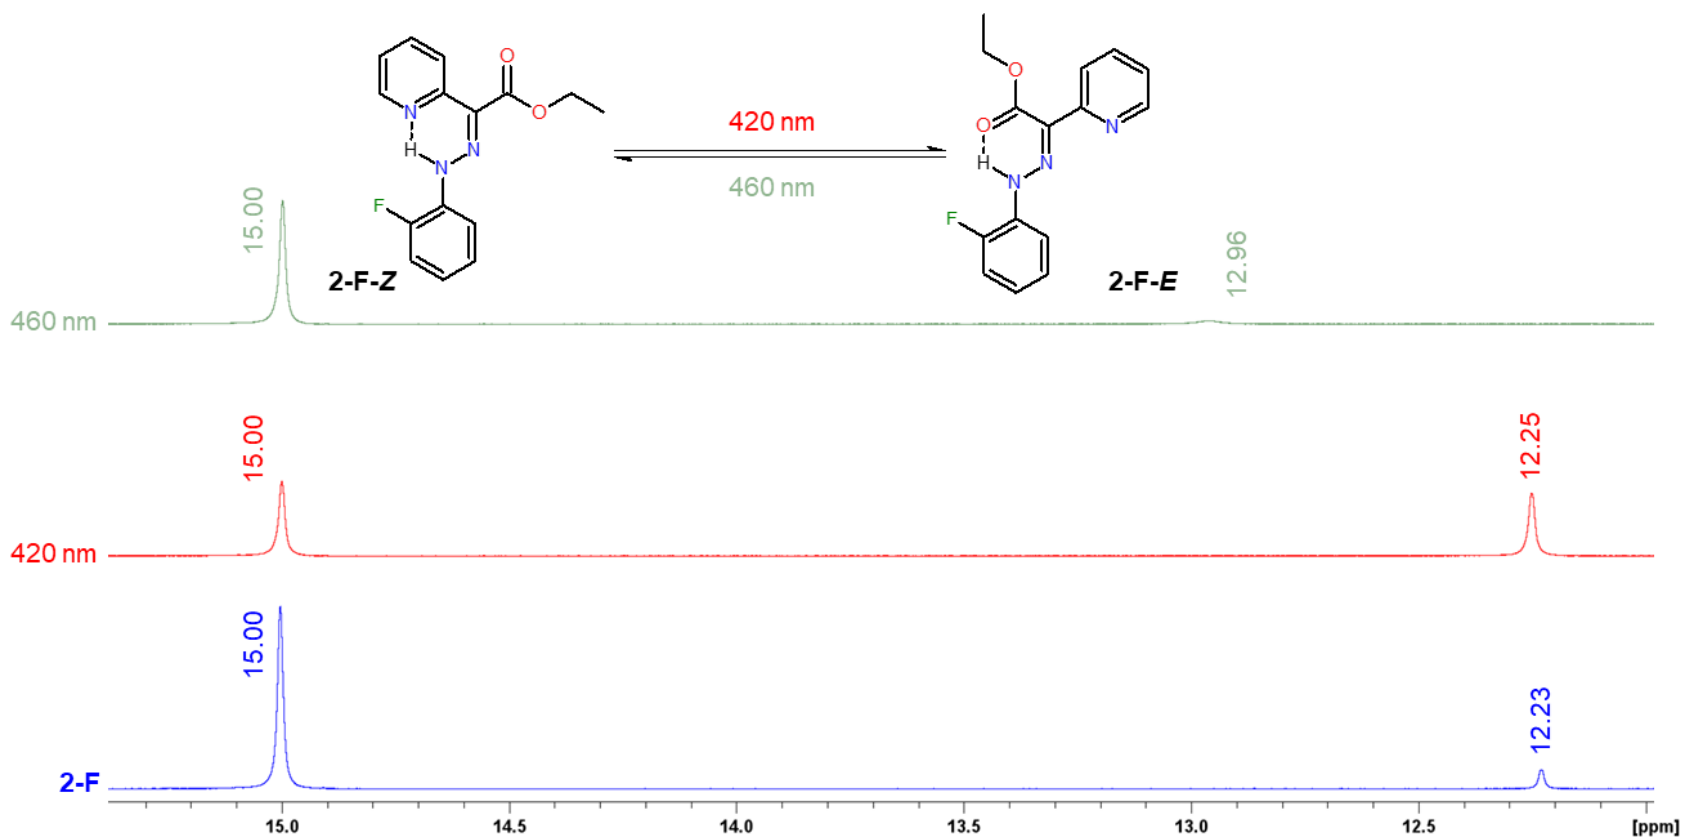

**Figure S29.** Comparison of N–H shift (ppm) of 2-F. <sup>1</sup>H NMR spectrum of obtained 2-F in blue. <sup>1</sup>H NMR spectrum after 420 nm/30 min. <sup>1</sup>H NMR spectrum after 460 nm/30 min. in green. CDCl<sub>3</sub>, 500 MHz, 298 K.



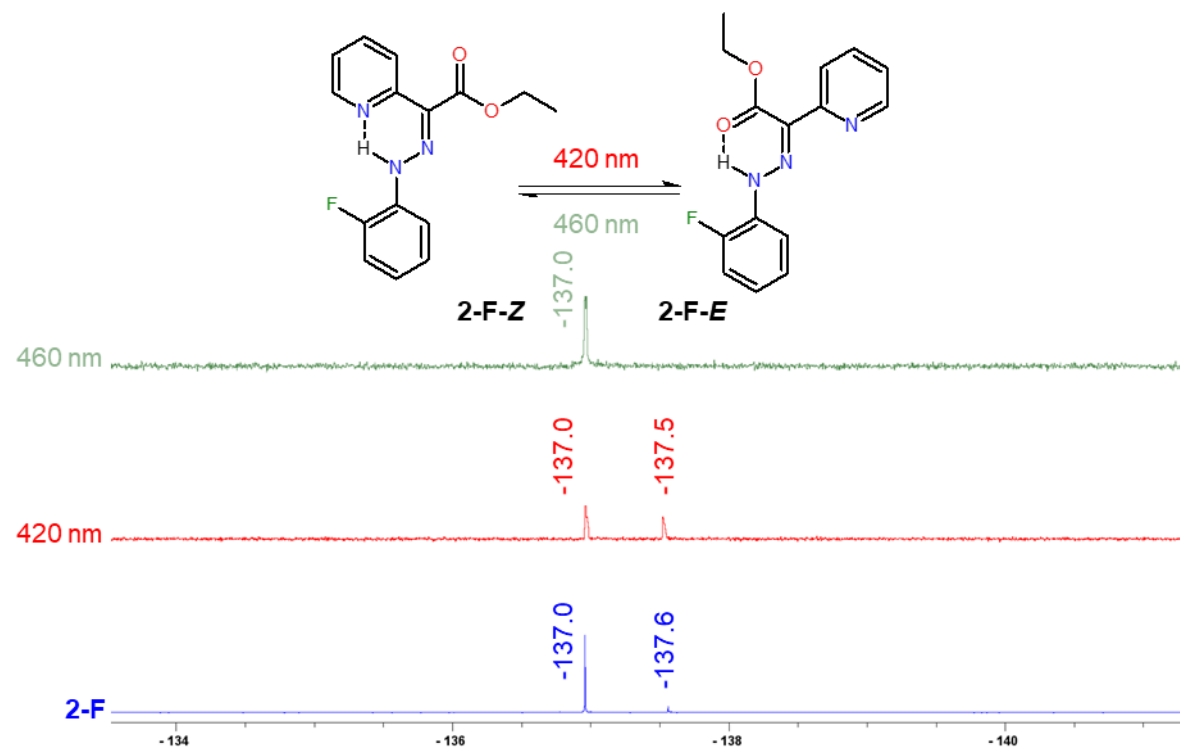

**Figure S30.** Comparison of C–F shift (ppm) of **2-F**.  $^{19}\text{F}$  NMR spectrum of obtained **2-F** (blue).  $^{19}\text{F}$  NMR spectrum after 420 nm/30 min (red).  $^{19}\text{F}$  NMR spectrum after 460 nm/30 min. (green).  $\text{CDCl}_3$ , 470 MHz, 298 K, ref.  $\text{CF}_3\text{COOH}$   $\delta = -78.50$  ppm.

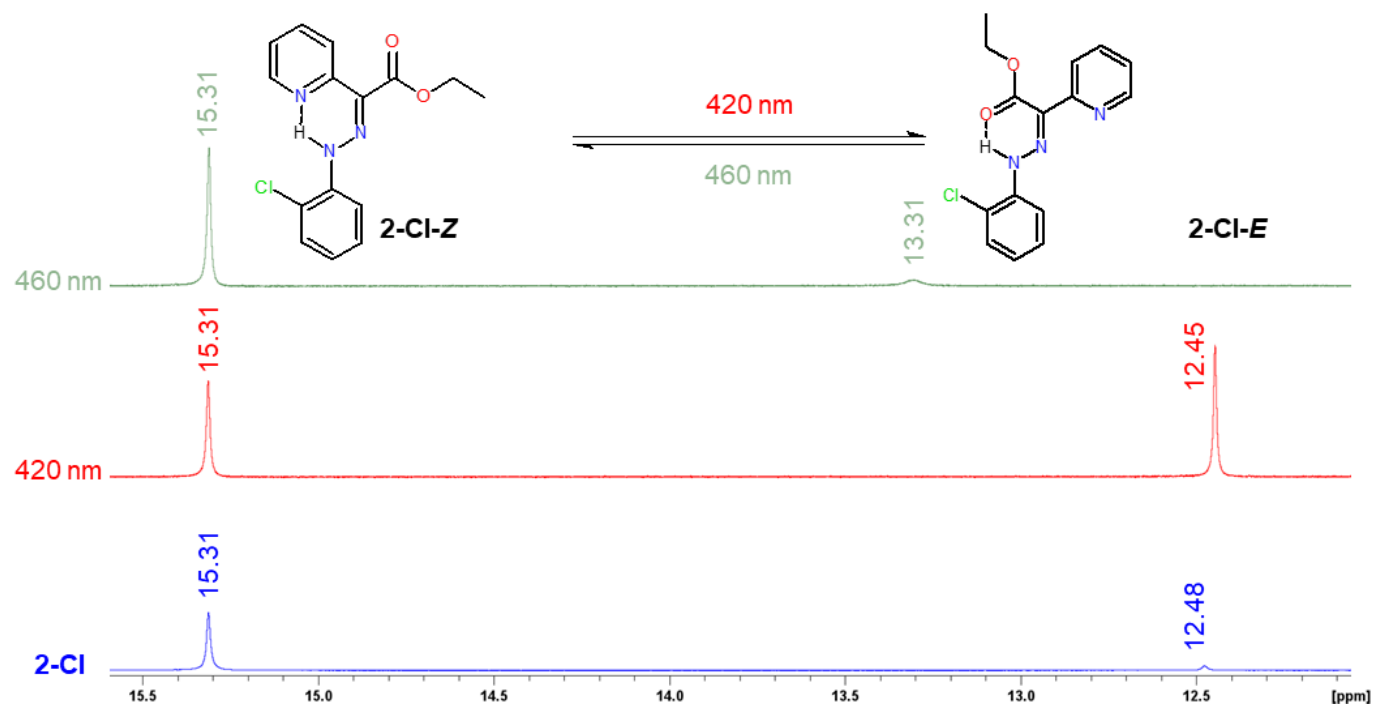

**Figure S31.** Comparison of N–H shift (ppm) of **2-Cl**.  $^1\text{H}$  NMR spectrum of obtained **2-Cl** (blue).  $^1\text{H}$  NMR spectrum after 420 nm/30 min (red).  $^1\text{H}$  NMR spectrum after 460 nm/30 min. (green).  $\text{CDCl}_3$ , 500 MHz, 298 K.

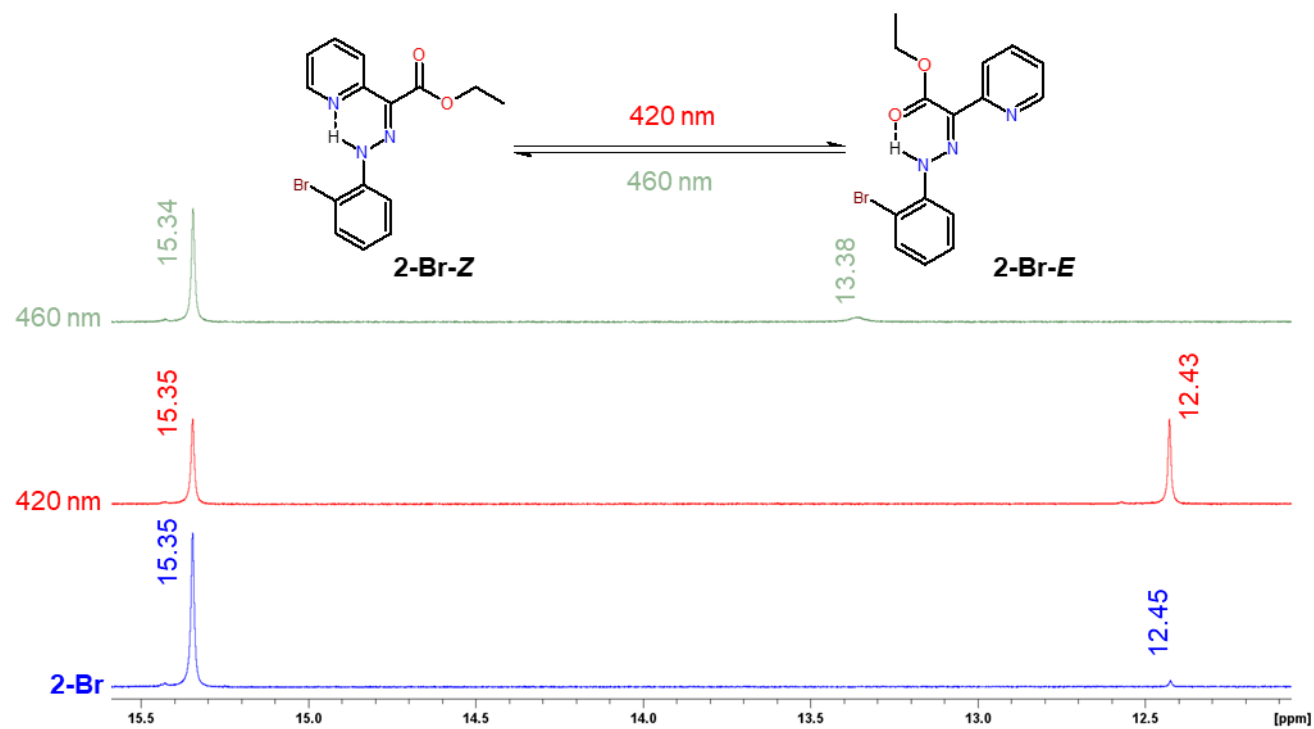

**Figure S32.** Comparison of N–H shift (ppm) of **2-Br**. <sup>1</sup>H NMR spectrum of obtained **2-Br** in blue. <sup>1</sup>H NMR spectrum after 420 nm/30 min. <sup>1</sup>H NMR spectrum after 460 nm/30 min. in green. CDCl<sub>3</sub>, 500 MHz, 298 K.

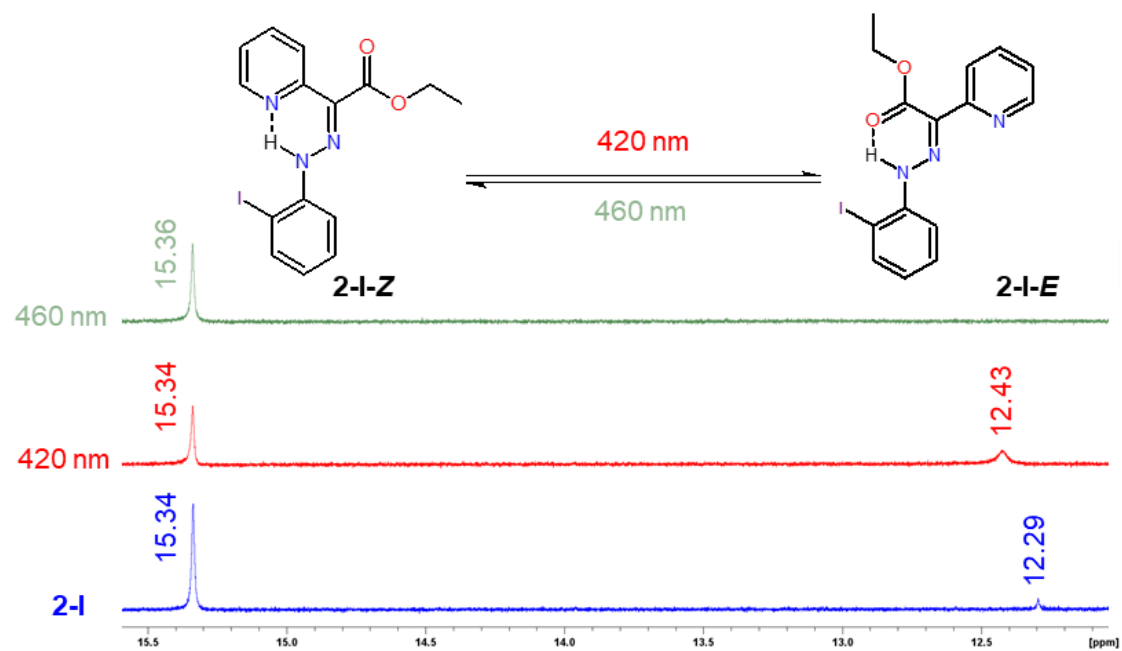

**Figure S33.** Comparison of *N-H* shift (ppm) of **2-I**. <sup>1</sup>H NMR spectrum of obtained **2-I** in blue. <sup>1</sup>H NMR spectrum after 420 nm/30 min. <sup>1</sup>H NMR spectrum after 460 nm/30 min. in green. CDCl<sub>3</sub>, 500 MHz, 298 K.

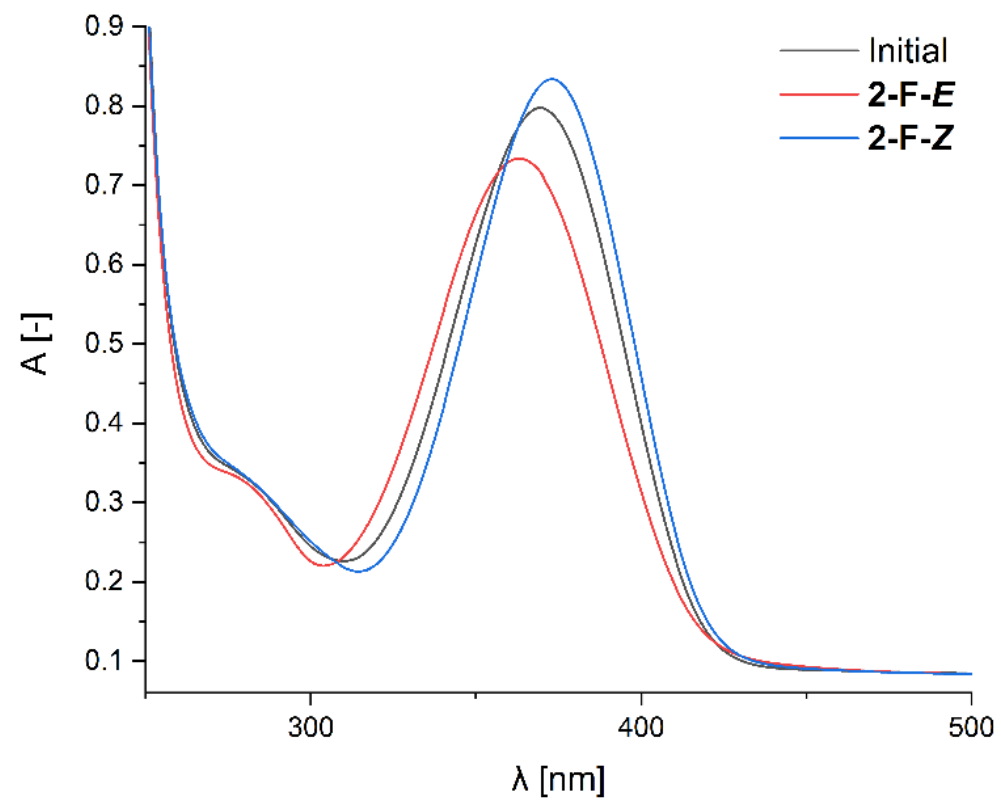

**Figure S34.** UV-VIS spectrum of compound **2-F** before (black line) and after irradiation at 420 nm (**2-F-E**, red line) and 460 nm (**2-F-Z**, blue line) for 30 minutes ( $2.73 \times 10^{-5}$  M,  $\text{CHCl}_3$ ).

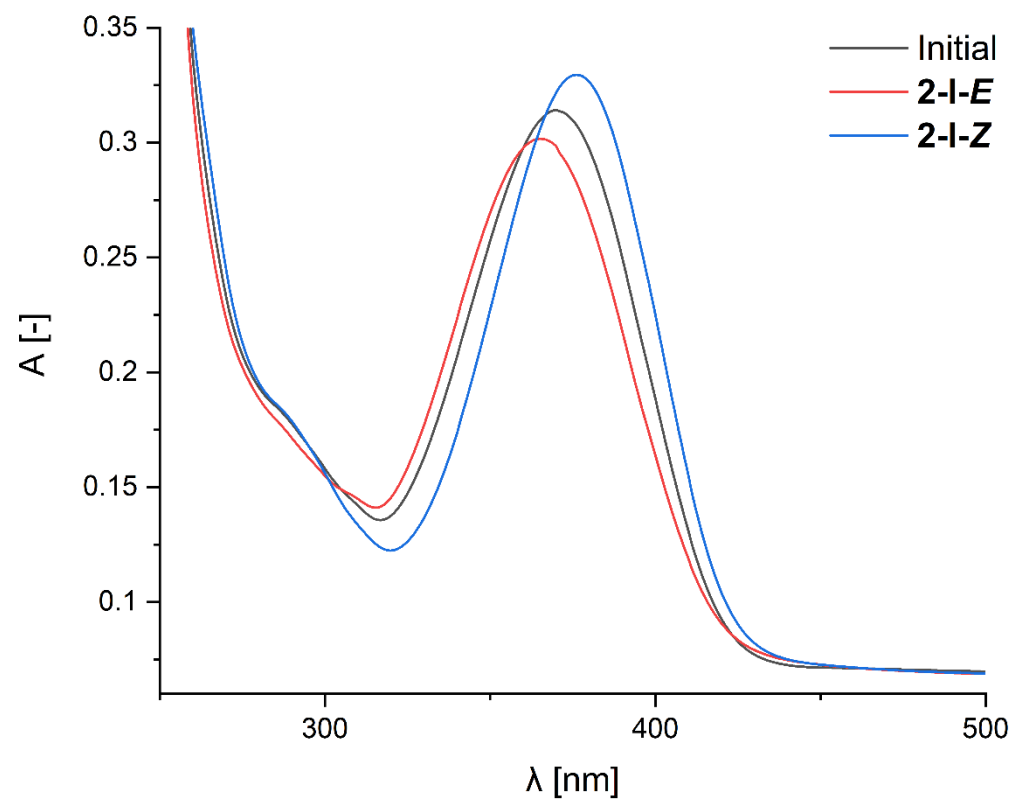

**Figure S35.** UV-VIS spectrum of compound **2-I** before (black line) and after irradiation at 420 nm (**2-I-E**, red line) and 460 nm (**2-I-Z**, blue line) for 30 minutes ( $1.36 \times 10^{-5}$  M,  $\text{CHCl}_3$ ).

## Photoswitching efficiency

All compounds were irradiated for 1 minute at 420 nm ( $Z \rightarrow E$ ) and for 3 minutes at 460 nm ( $E \rightarrow Z$ ) in chloroform. The optimization of irradiation conditions was performed for **2-Cl** and **2-Br**: 20 seconds at 420 nm ( $Z \rightarrow E$ ) and 20 seconds at 365 nm ( $E \rightarrow Z$ ). Compounds **2-F** and **2-Cl** were also photoswitched in toluene and acetonitrile.

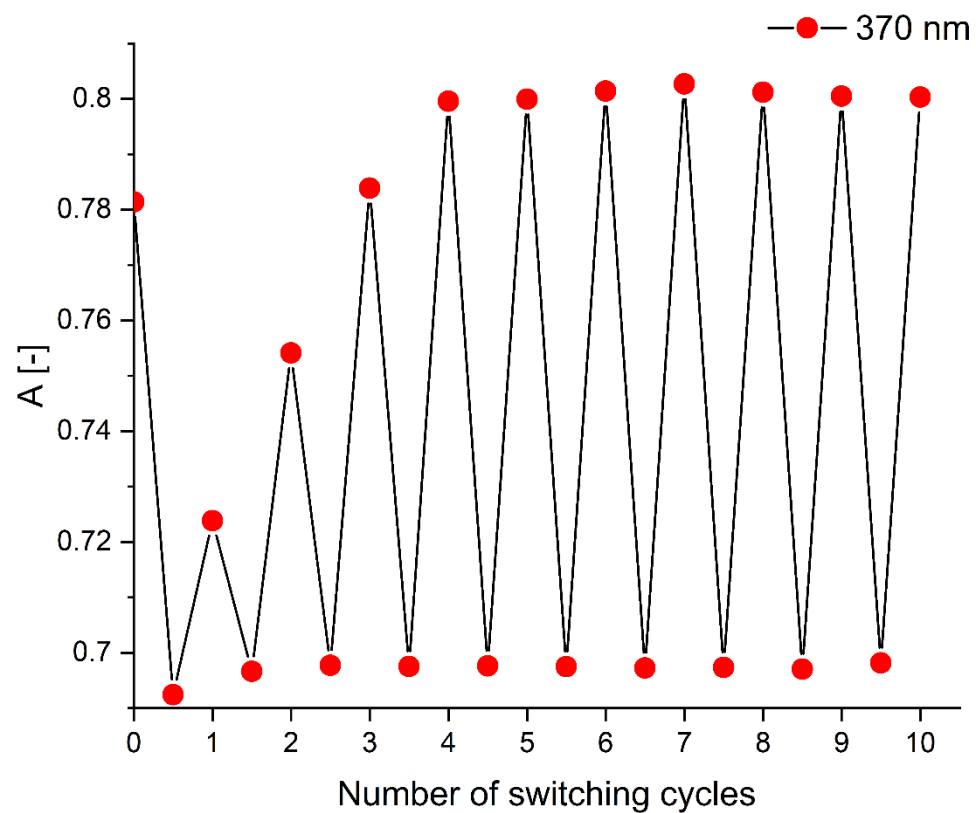

**Figure S36.** Isomerization cycles of **2-F** upon alternating irradiation at 420 nm for 1 min (bottom red dots) and 460 nm for 3 min (top red dots). The absorbances at 370 nm are plotted ( $2.73 \times 10^{-5}$  M,  $\text{CHCl}_3$ ).

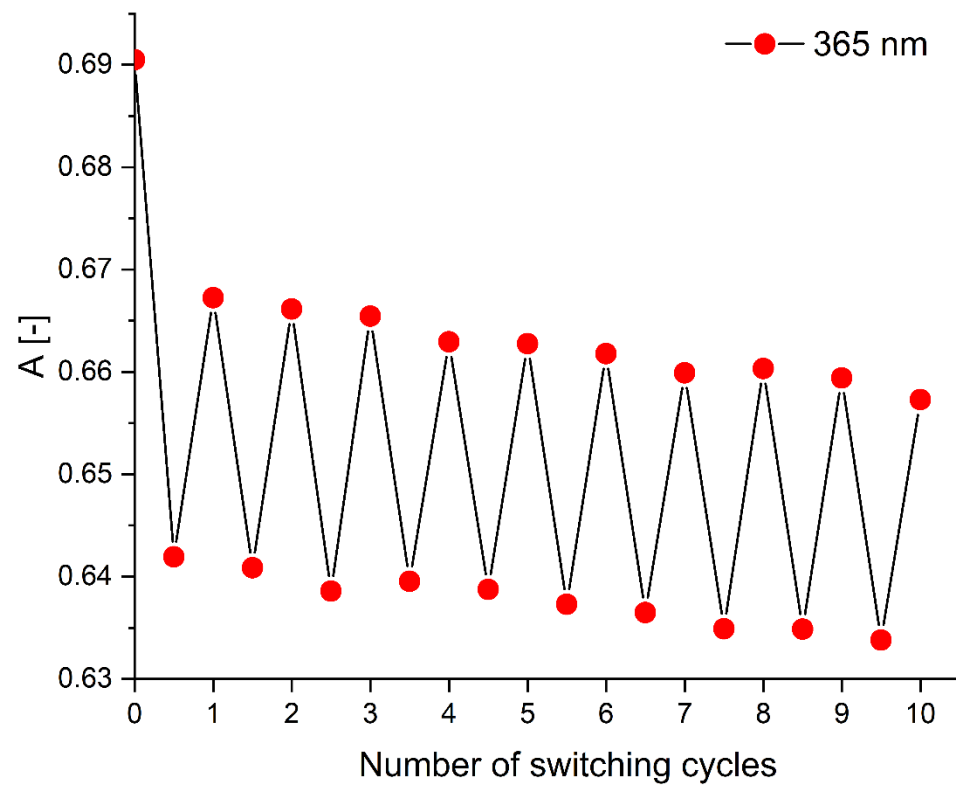

**Figure S37.** Isomerization cycles of **2-F** upon alternating irradiation at 420 nm for 20 s (bottom red dots) and 365 nm for 20 s (top red dots). The absorbances at 365 nm are plotted ( $2.41 \times 10^{-5}$  M, toluene).



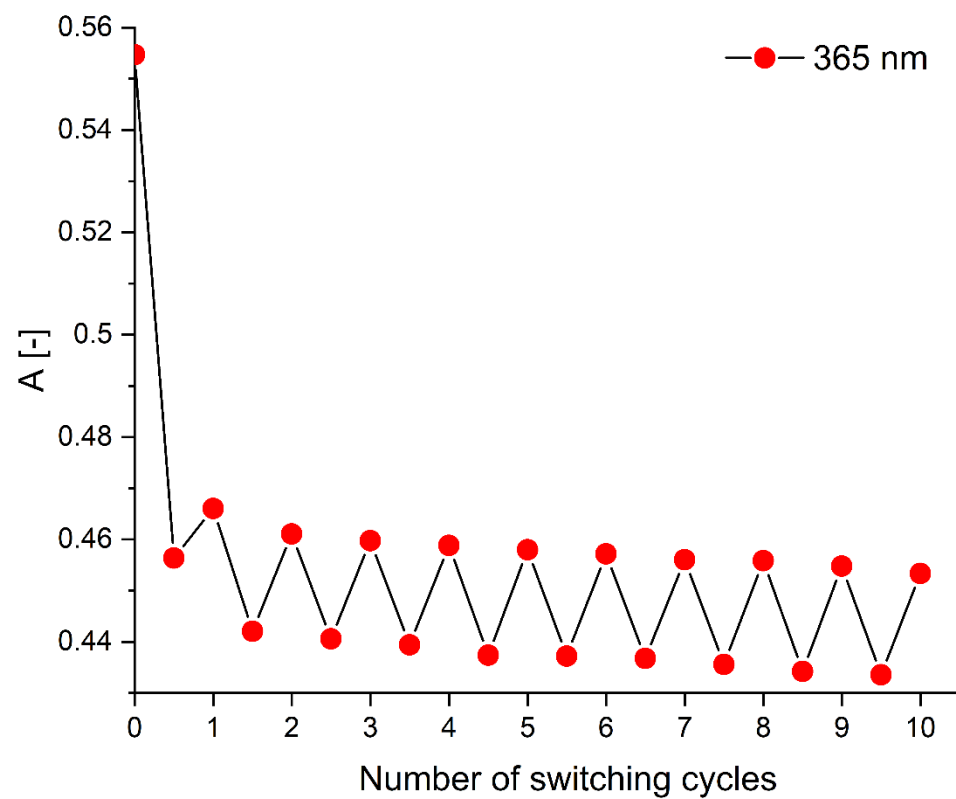

**Figure S38.** Isomerization cycles of **2-F** upon alternating irradiation at 420 nm for 20 s (bottom red dots) and 365 nm for 20 s (top red dots). The absorbances at 365 nm are plotted ( $1.92 \times 10^{-5}$  M, acetonitrile).

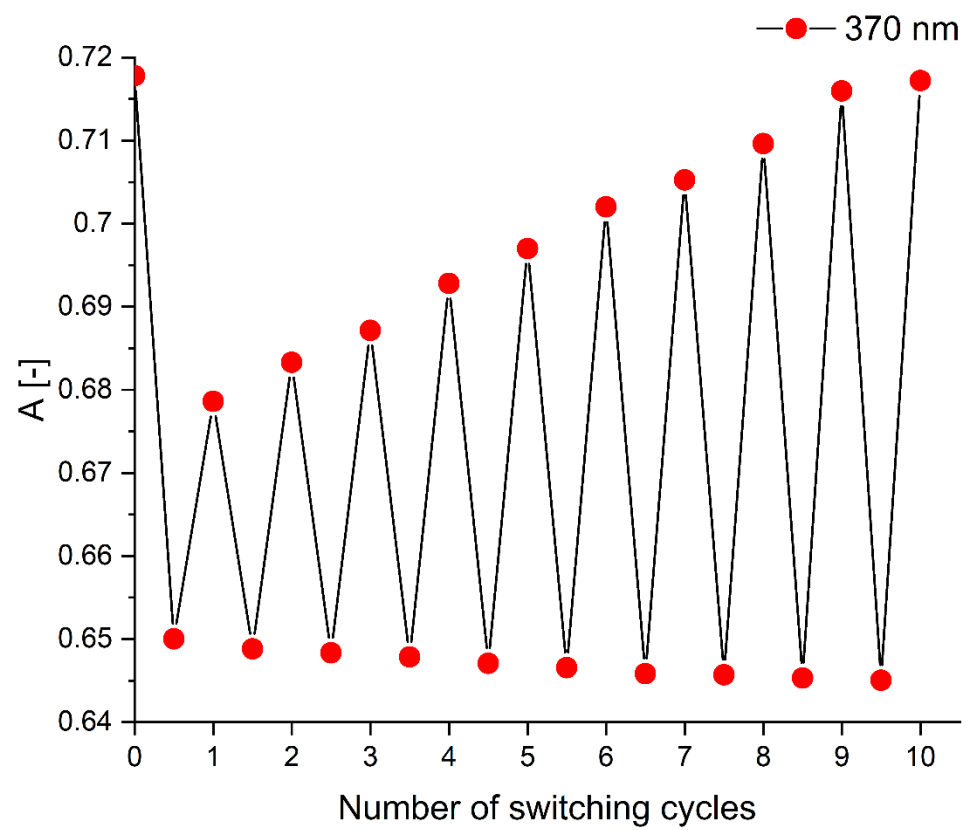

**Figure S39.** Isomerization cycles of **2-Cl** upon alternating irradiation at 420 nm for 1 min (bottom red dots) and 460 nm for 3 min (top red dots). The absorbances at 370 nm are plotted ( $2.73 \times 10^{-5}$  M,  $\text{CHCl}_3$ ).

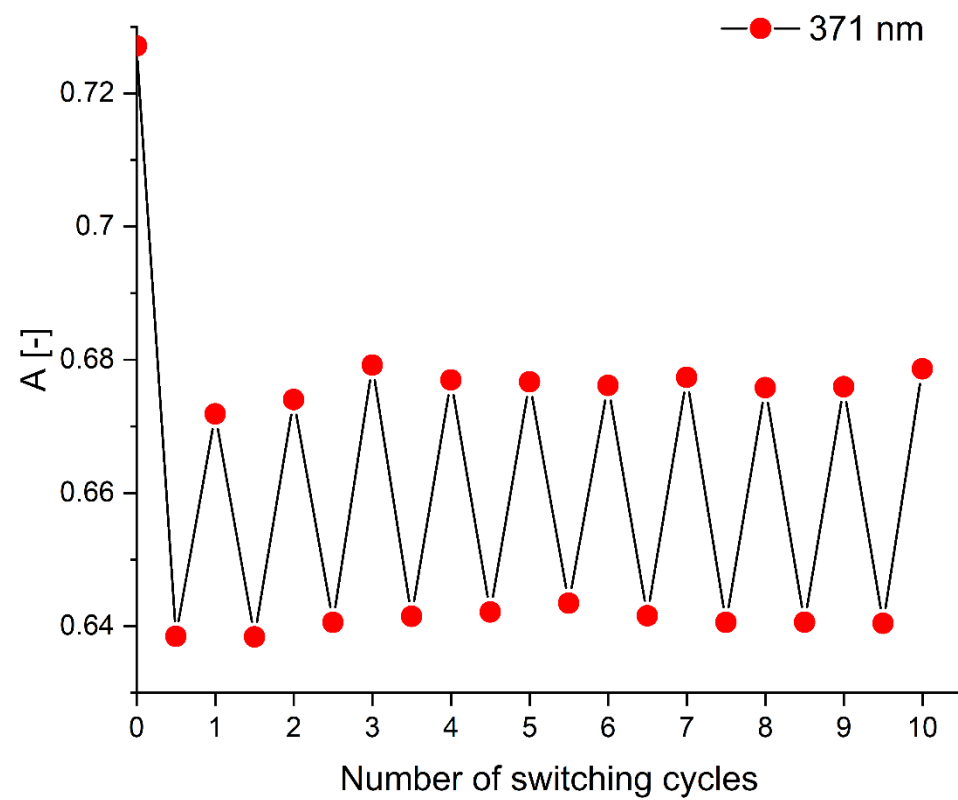

**Figure S40.** Isomerization cycles of **2-CI** upon alternating irradiation at 420 nm for 20 s (bottom red dots) and 365 nm for 20 s (top red dots). The absorbances at 371 nm are plotted ( $2.73 \times 10^{-5}$  M,  $\text{CHCl}_3$ ).

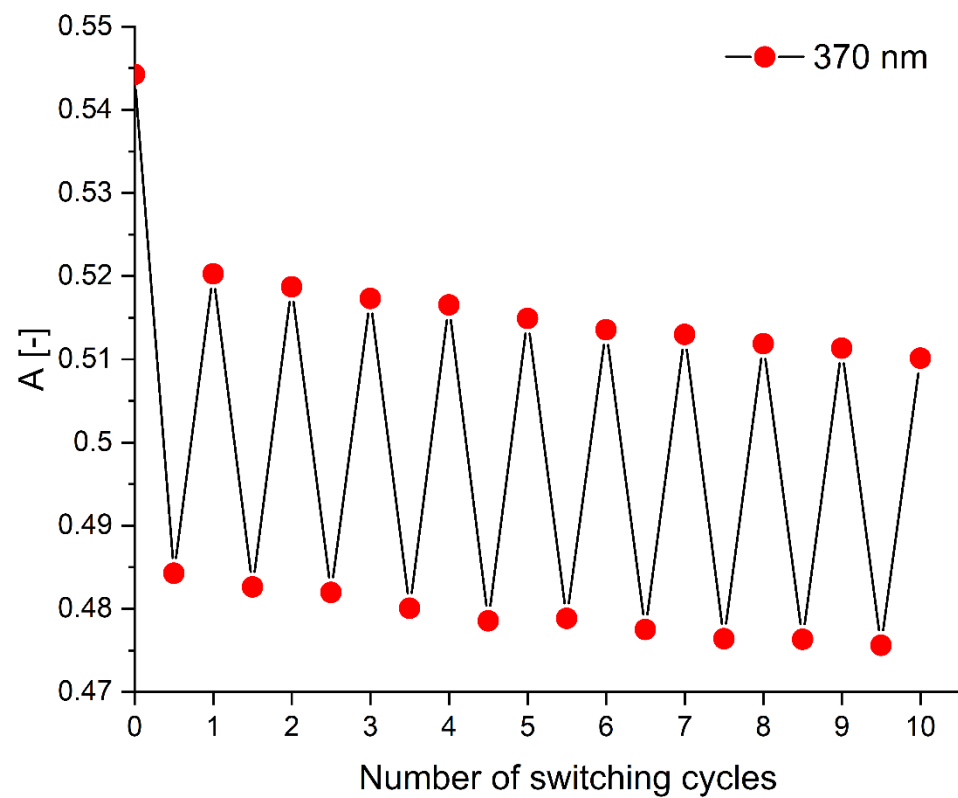

**Figure S41.** Isomerization cycles of **2-Cl** upon alternating irradiation at 420 nm for 20 s (bottom red dots) and 365 nm for 20 s (top red dots). The absorbances at 370 nm are plotted ( $2.05 \times 10^{-5}$  M, toluene).

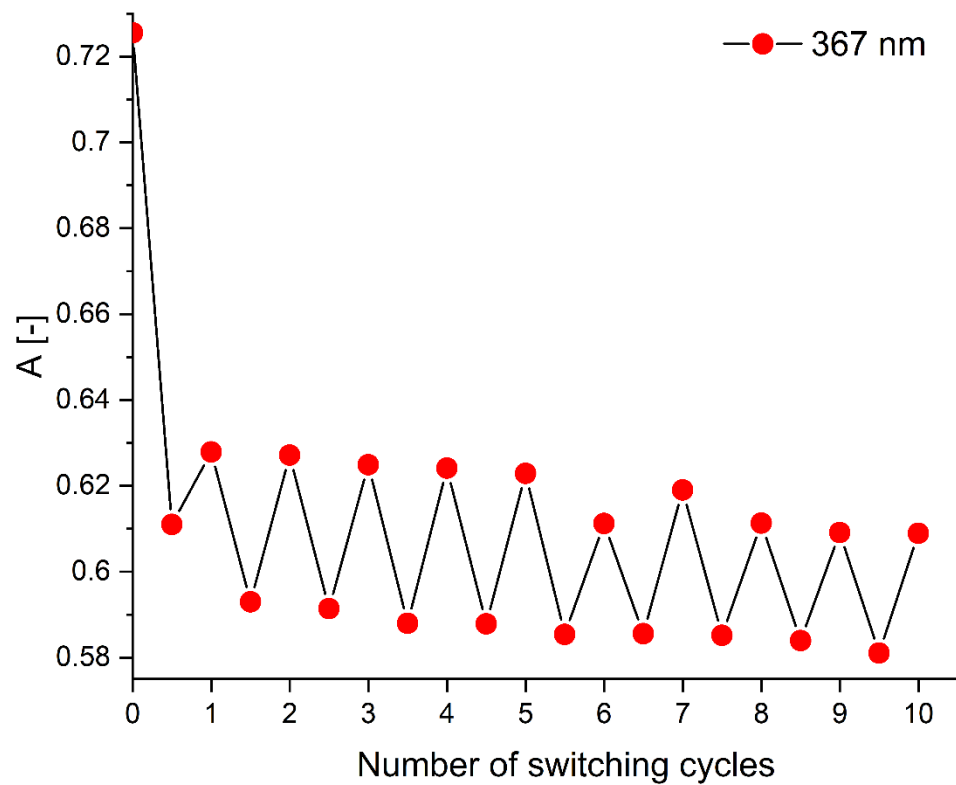

**Figure S42.** Isomerization cycles of 2-CI upon alternating irradiation at 420 nm for 20 s (bottom red dots) and 365 nm for 20 s (top red dots). The absorbances at 367 nm are plotted ( $2.78 \times 10^{-5}$  M, acetonitrile).

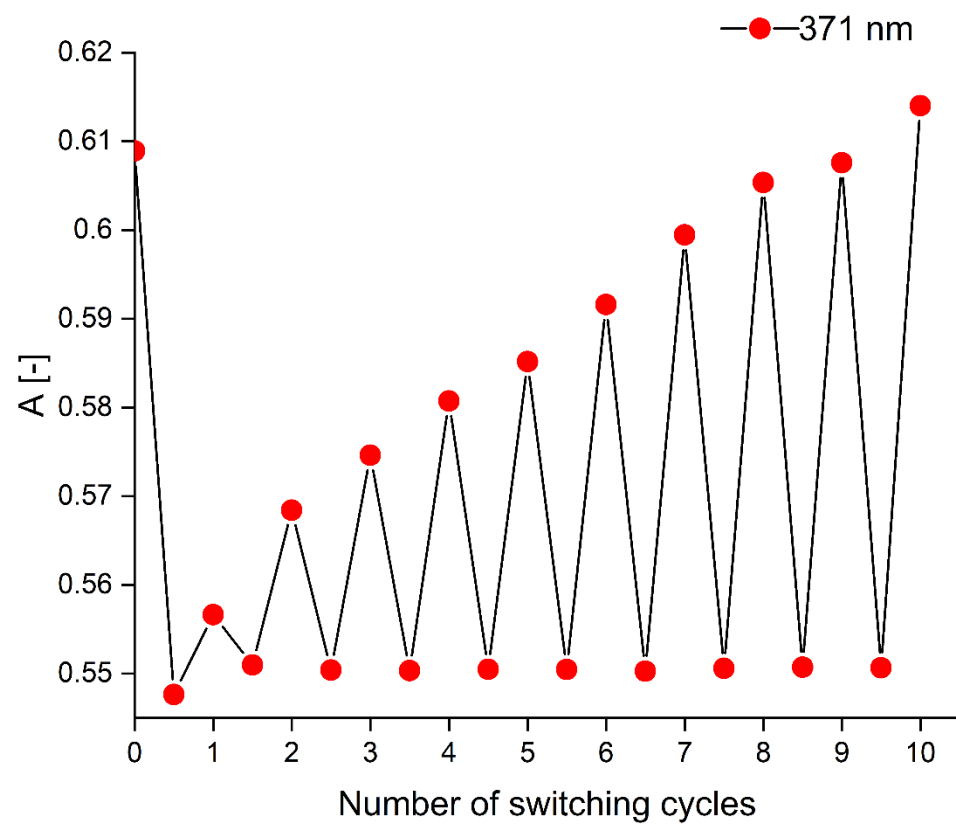

**Figure S43.** Isomerization cycles of **2-Br** upon alternating irradiation at 420 nm for 1 min (bottom red dots) and 460 nm for 1 min (top red dots). The absorbances at 371 nm are plotted ( $2.73 \times 10^{-5}$  M,  $\text{CHCl}_3$ ).

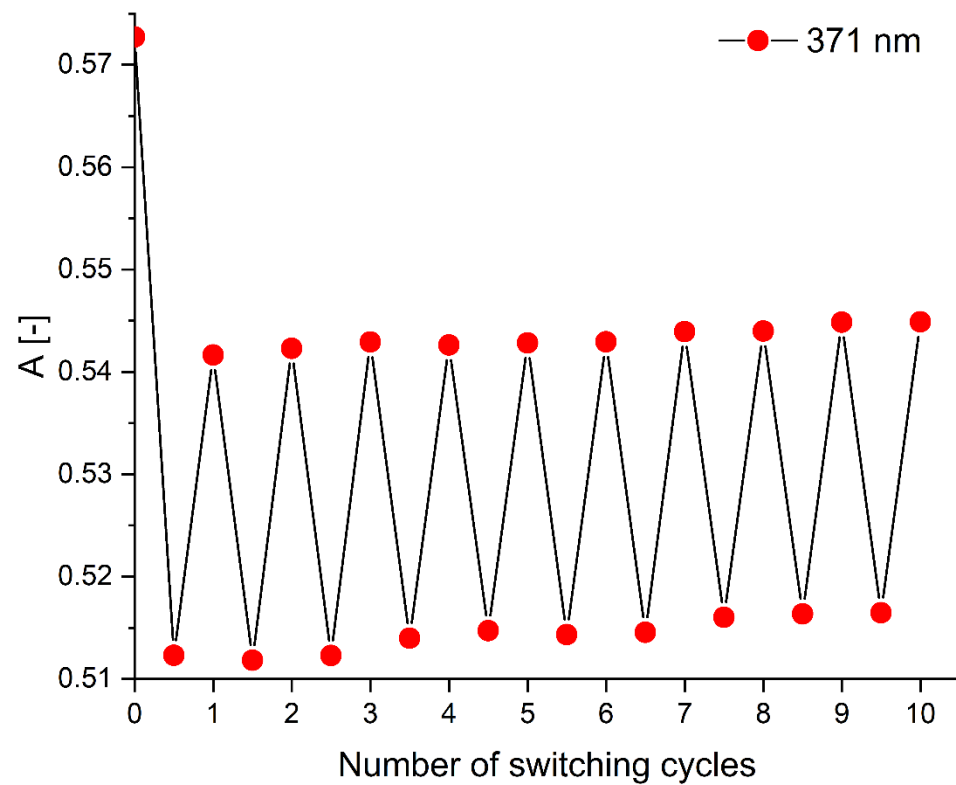

**Figure S44.** Isomerization cycles of **2-Br** upon alternating irradiation at 420 nm for 20 s (bottom red dots) and 365 nm for 20 s (top red dots). The absorbances at 371 nm are plotted ( $2.73 \times 10^{-5}$  M,  $\text{CHCl}_3$ ).

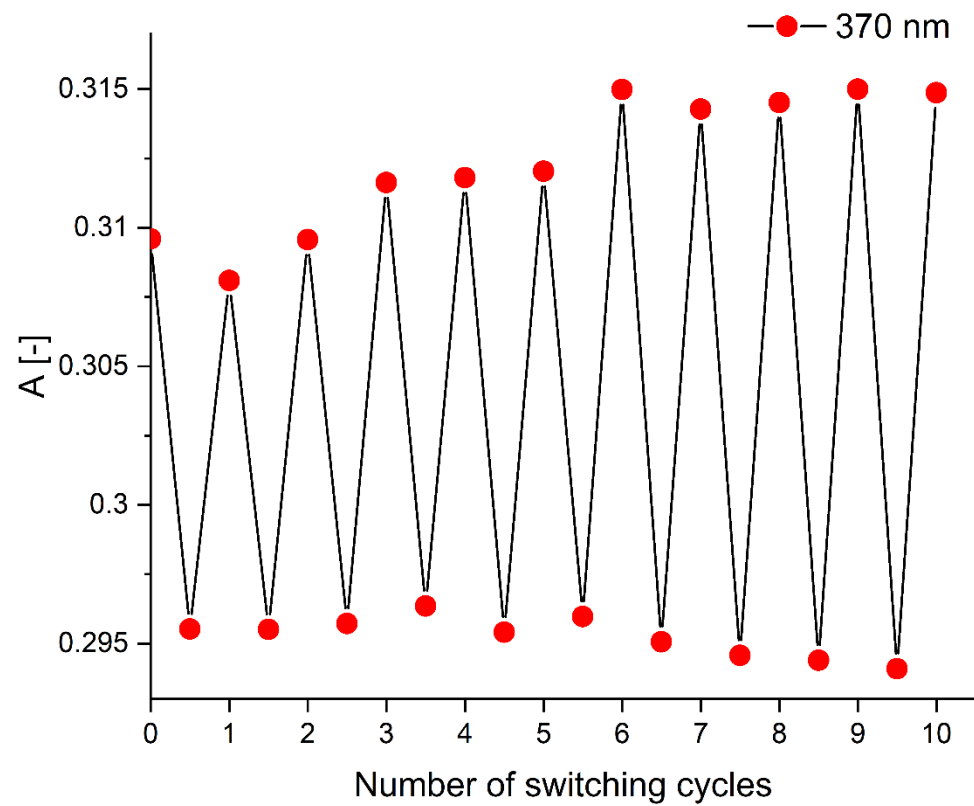

**Figure S45.** Isomerization cycles of **2-I** upon alternating irradiation at 420 nm for 1 min (bottom red dots) and 460 nm for 3 min (top red dots). The absorbances at 370 nm are plotted ( $1.36 \times 10^{-5}$  M,  $\text{CHCl}_3$ ).



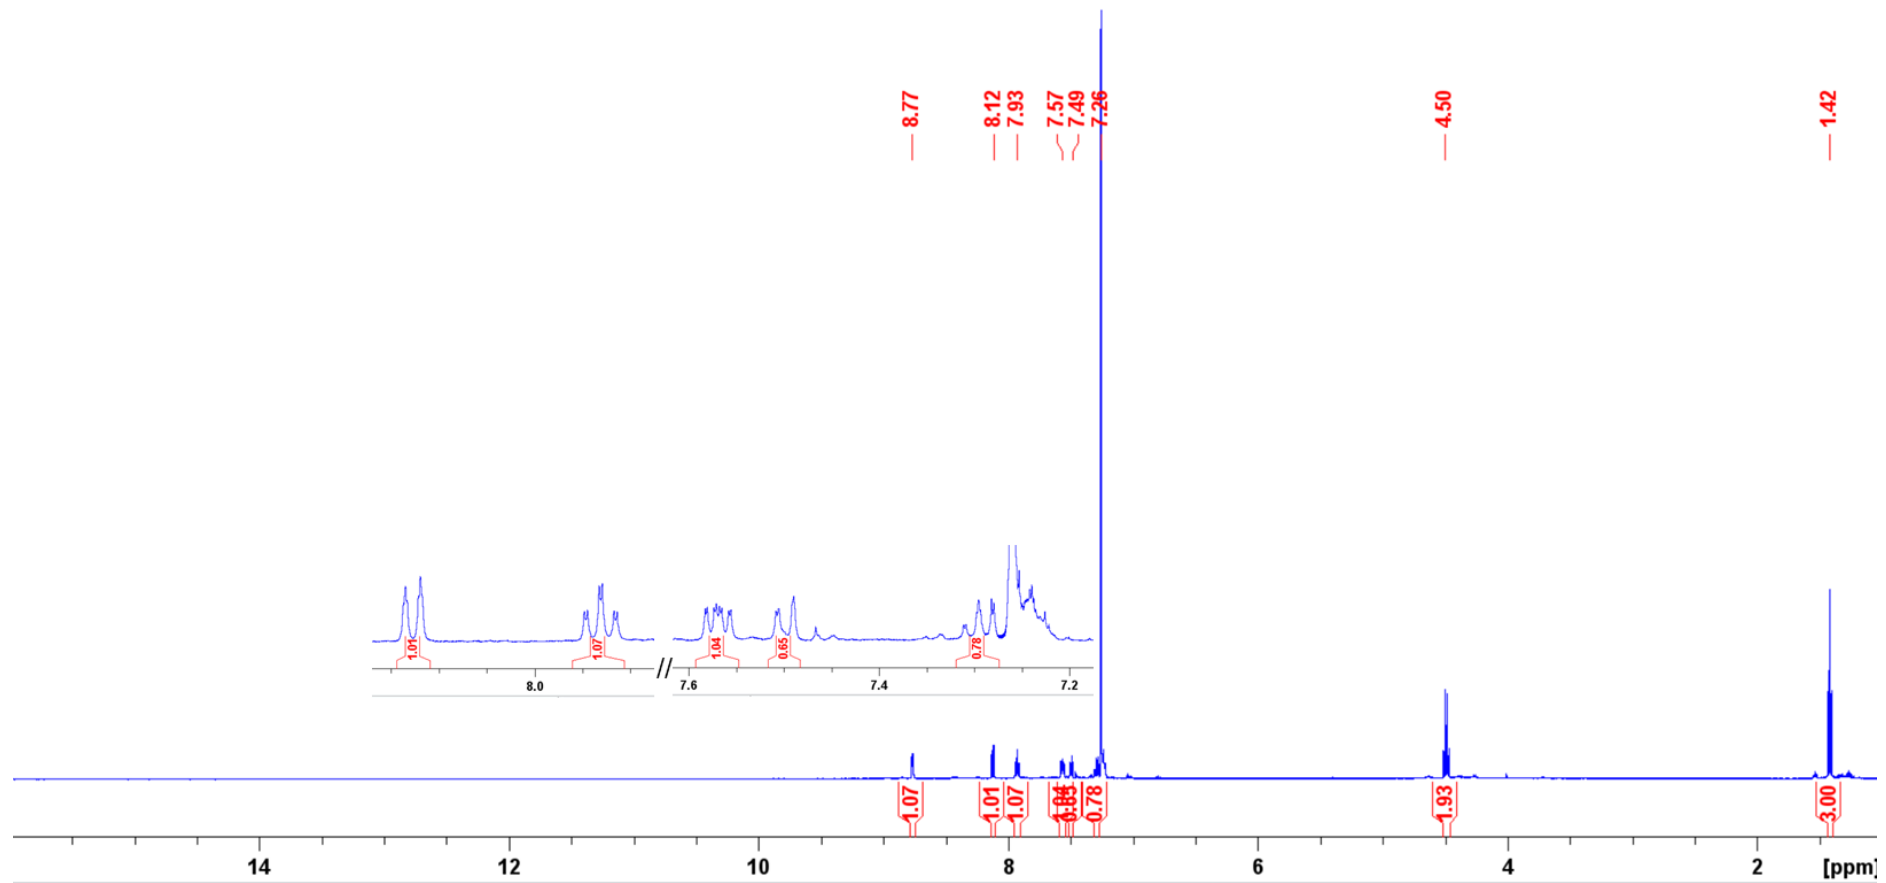

Figure S46. <sup>1</sup>H NMR spectrum of 2-Br (c = 0.02 M) recorded after exposition on 460 nm over 3 hours, CDCl<sub>3</sub>, 500 MHz, 298 K.

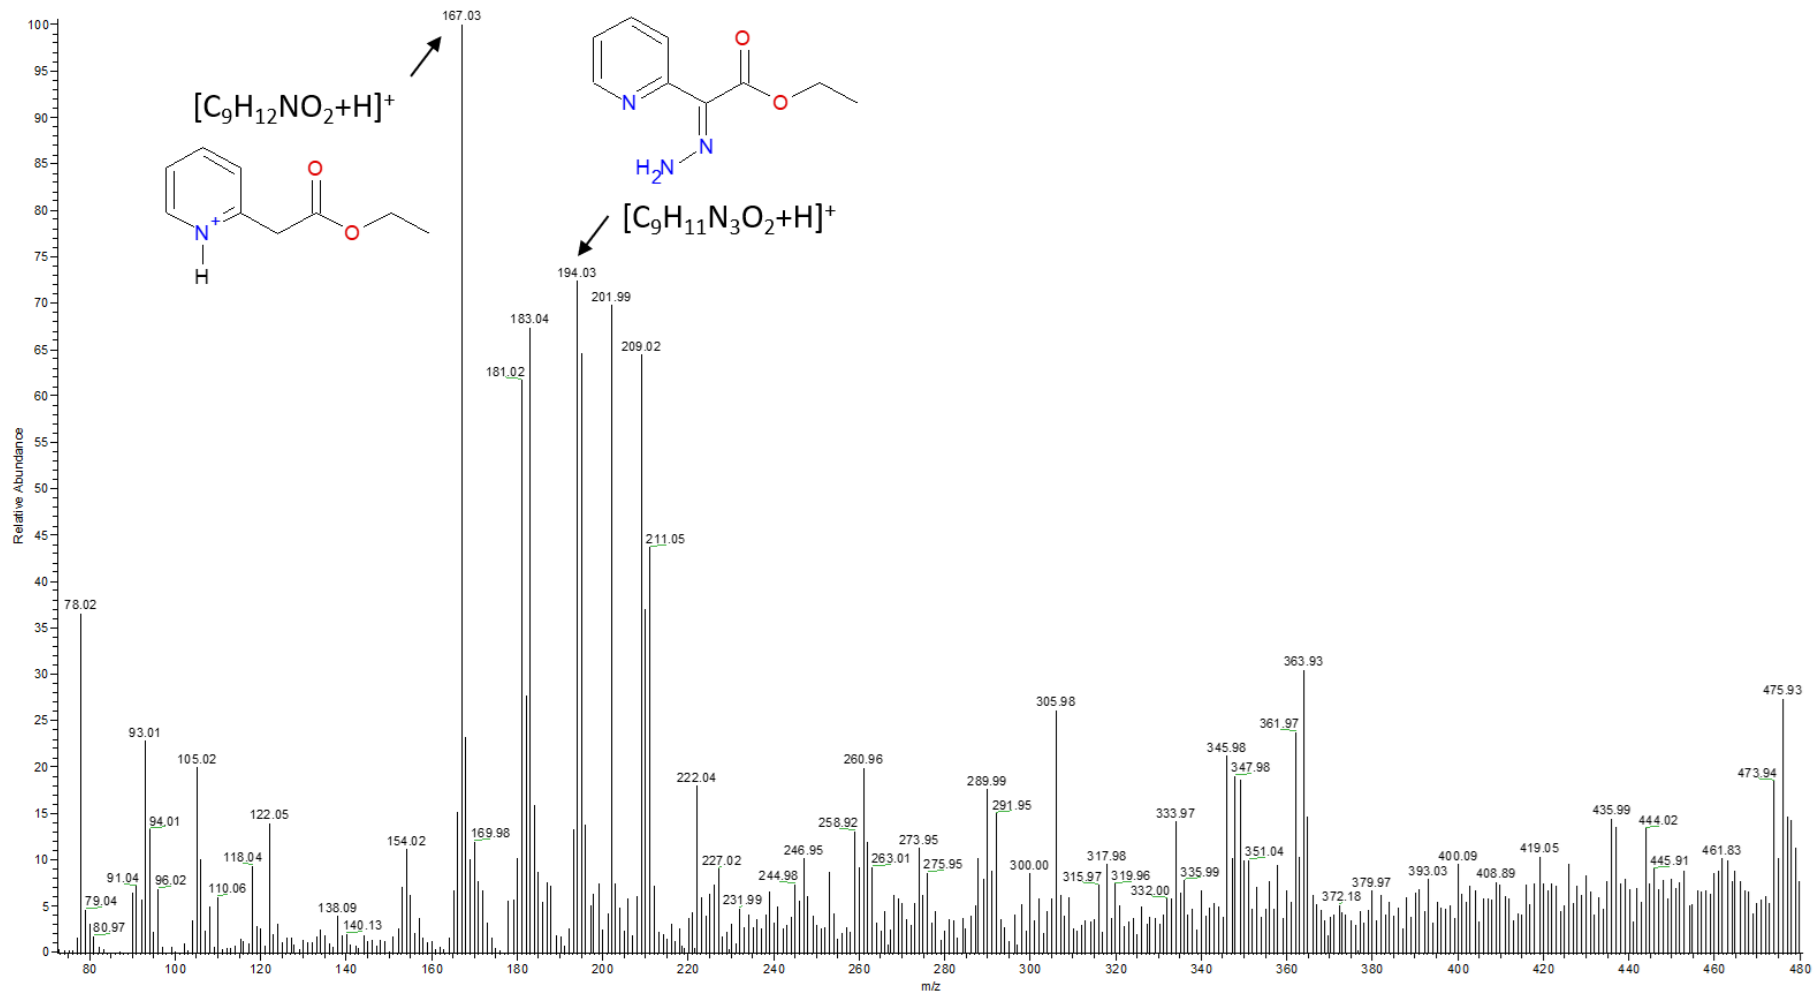

**Figure S47.** Positive ion mode MS spectrum of **2-Br** (in MeOH) after exposition to 460 nm irradiation for 3 hours at 0.02 M concentration.

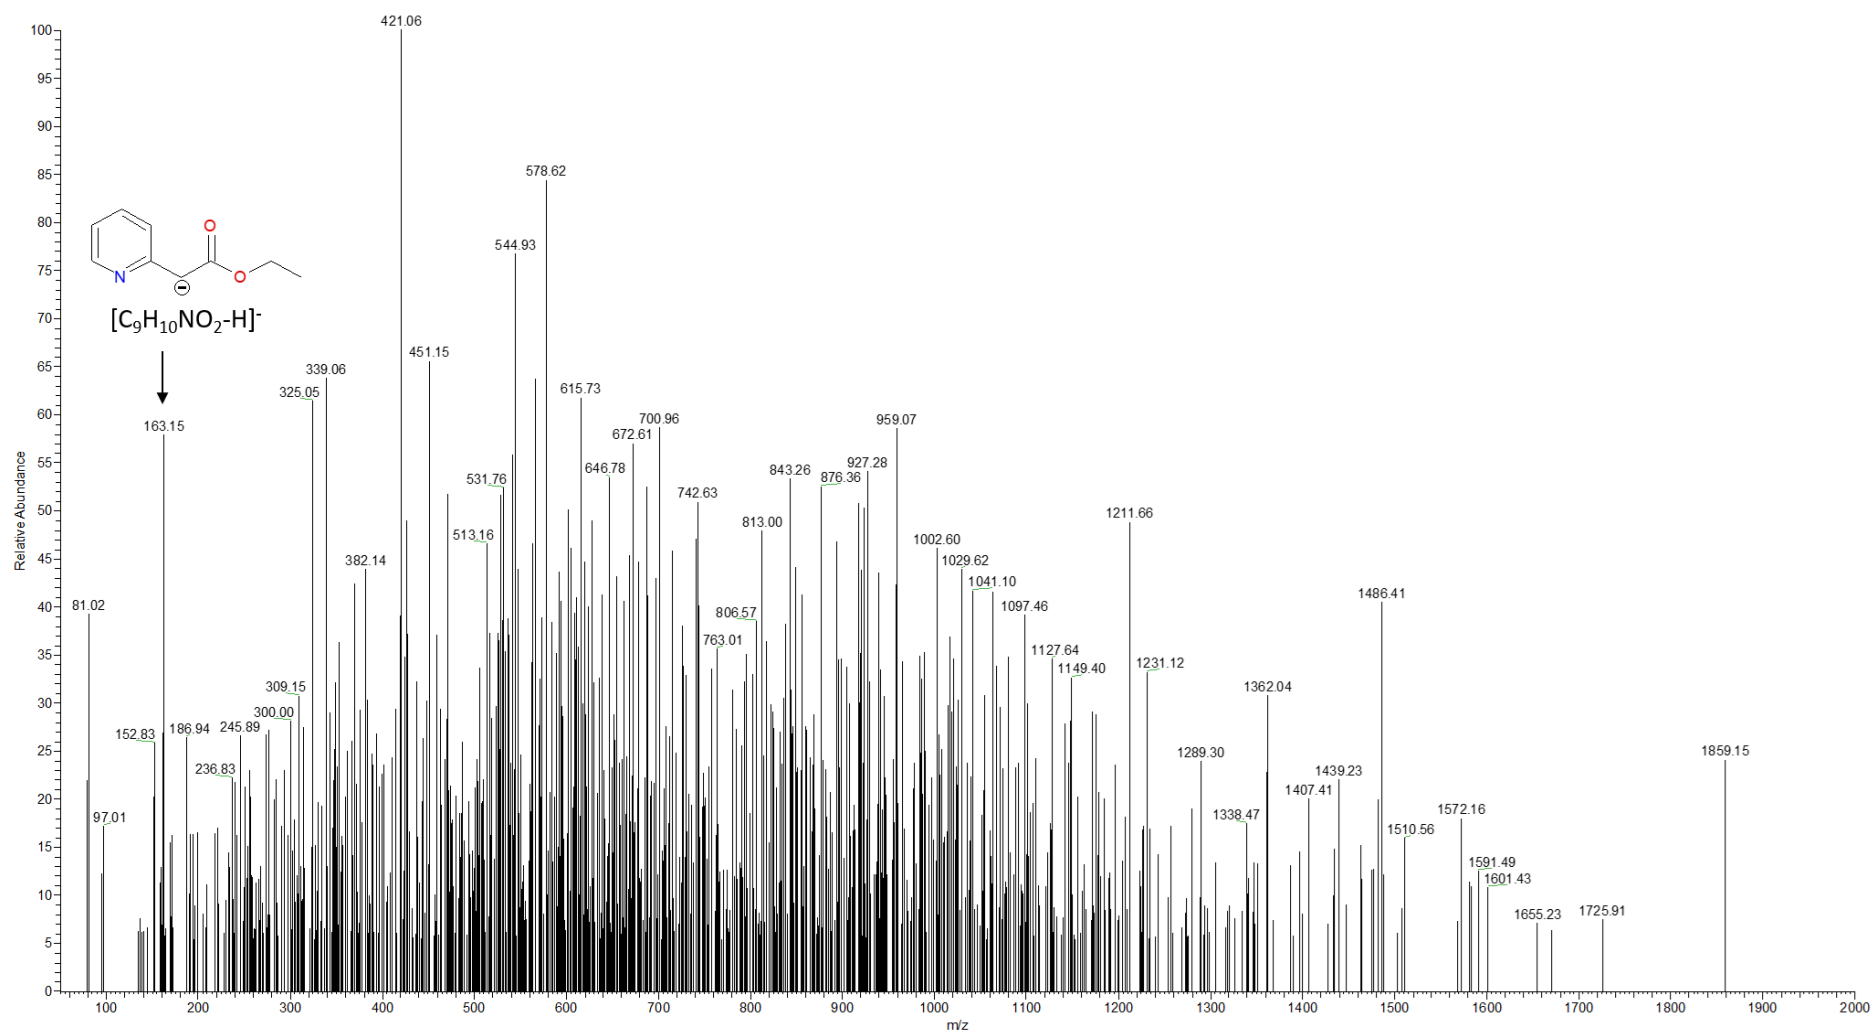

Figure S48. Negative ion mode MS spectrum of 2-Br (in MeOH) after exposition to 460 nm irradiation for 3 hours at 0.02 M concentration.

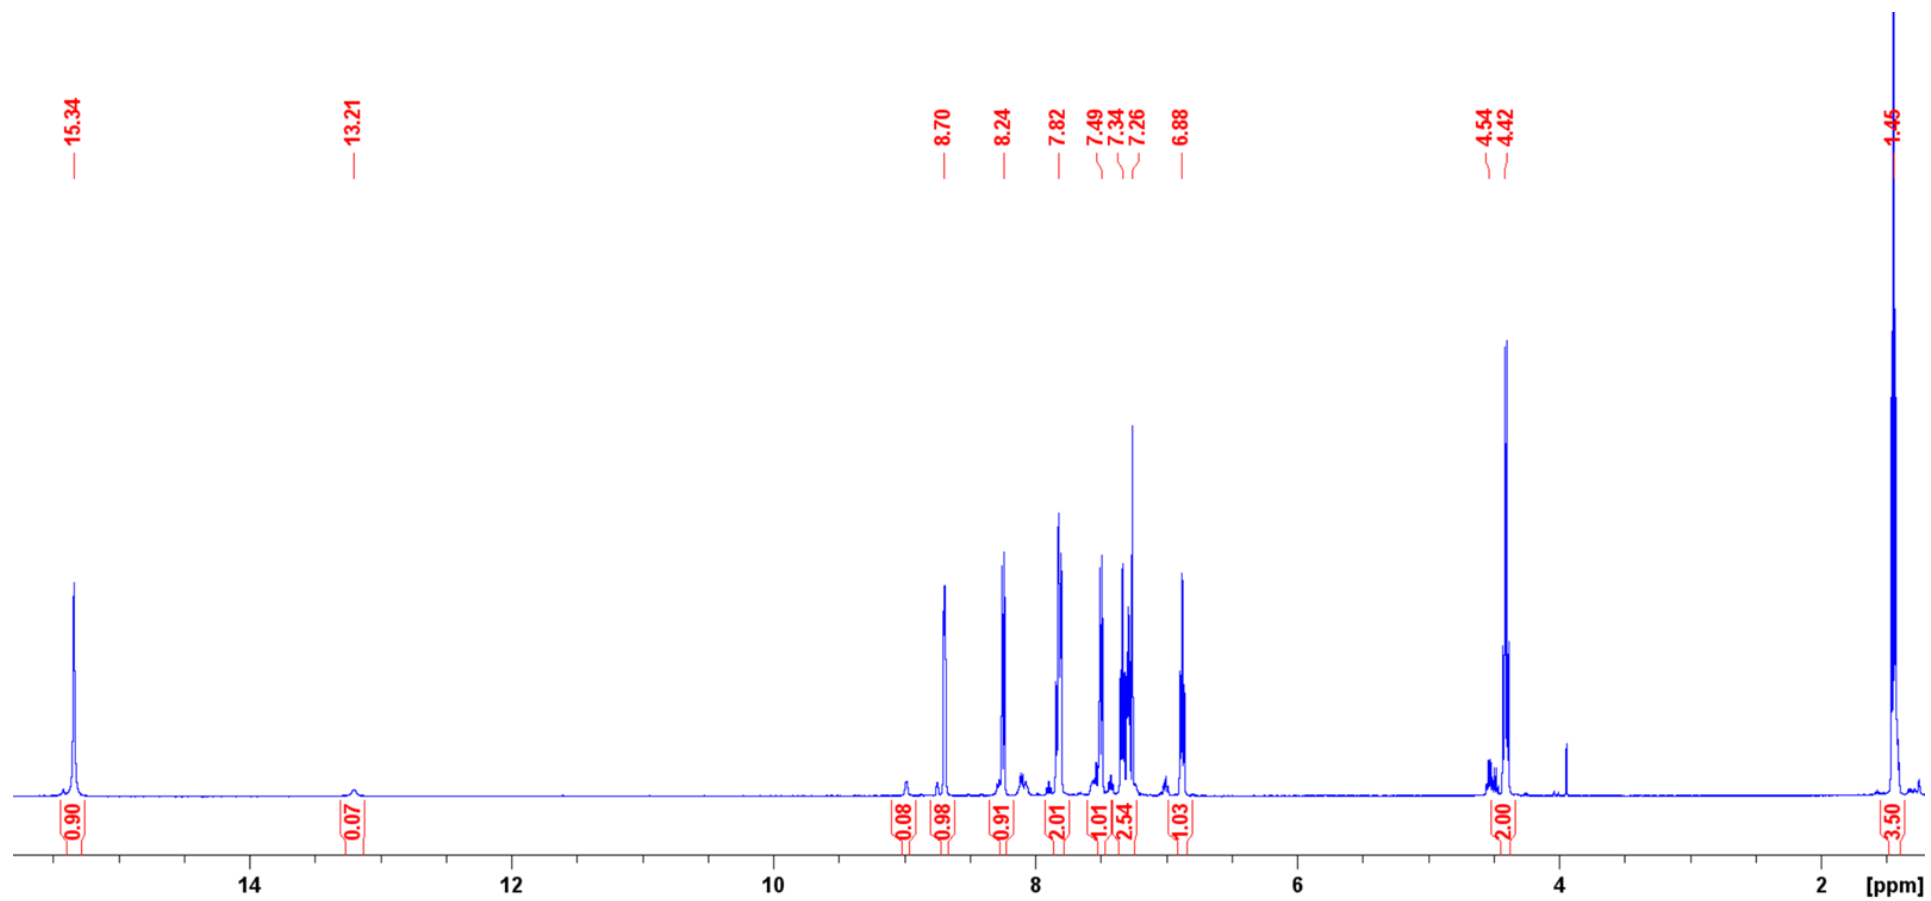

Figure S49. <sup>1</sup>H NMR spectrum of 2-Br (c = 0.1 M) recorded after exposition on 460 nm over 3 hours, CDCl<sub>3</sub>, 500 MHz, 298 K.

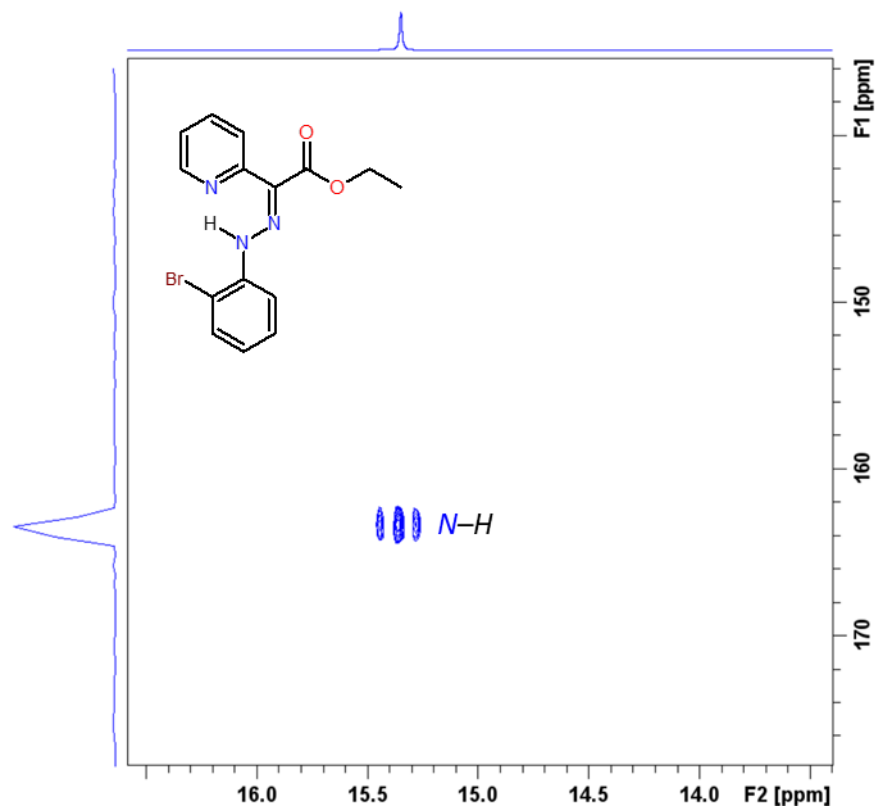

**Figure S50.**  $^{15}\text{N}$ - $^1\text{H}$  HSQC correlation chart of **2-Br** ( $c = 0.1 \text{ M}$ ),  $\text{CDCl}_3$ , 50 MHz–500 MHz, 298 K, ref.  $\text{NH}_3(\text{liq.})$   $\delta = 380.20 \text{ ppm}$ .

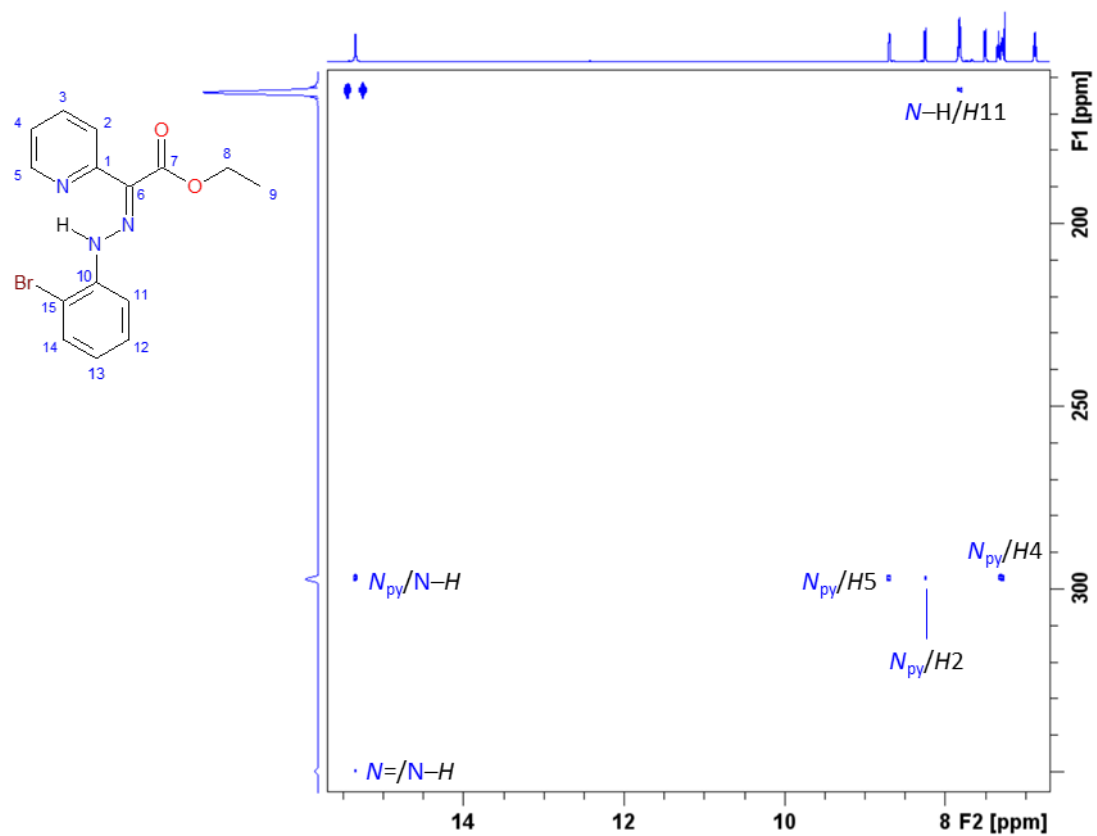

**Figure S51.**  $^{15}\text{N}$ - $^1\text{H}$  HMBC correlation chart of **2-Br** ( $c = 0.1 \text{ M}$ ),  $\text{CDCl}_3$ , 50 MHz–500 MHz, 298 K, ref.  $\text{NH}_3(\text{liq.})$   $\delta = 380.20 \text{ ppm}$ .

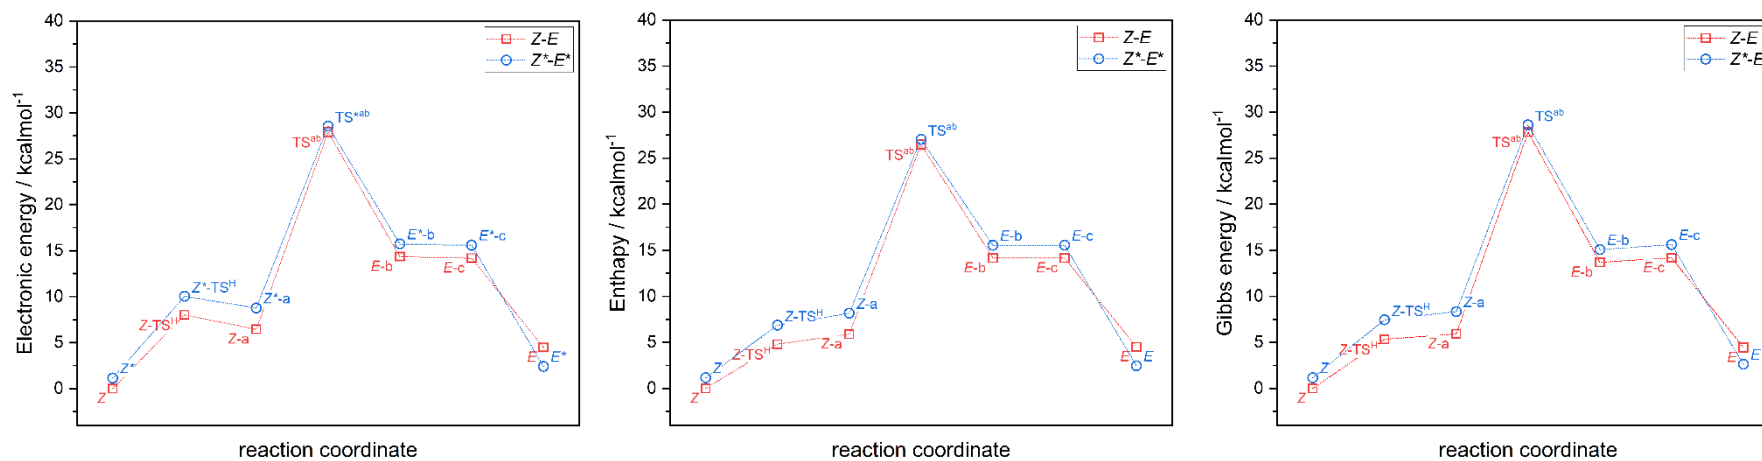

**Figure S52.** The minimal energy pathway for *Z-E* isomerization for **2-F** calculated with CAM-B3LYP+D4/def2-TZVP/C-CPCM(CHCl<sub>3</sub>): relative energies, enthalpies, and Gibbs energies.

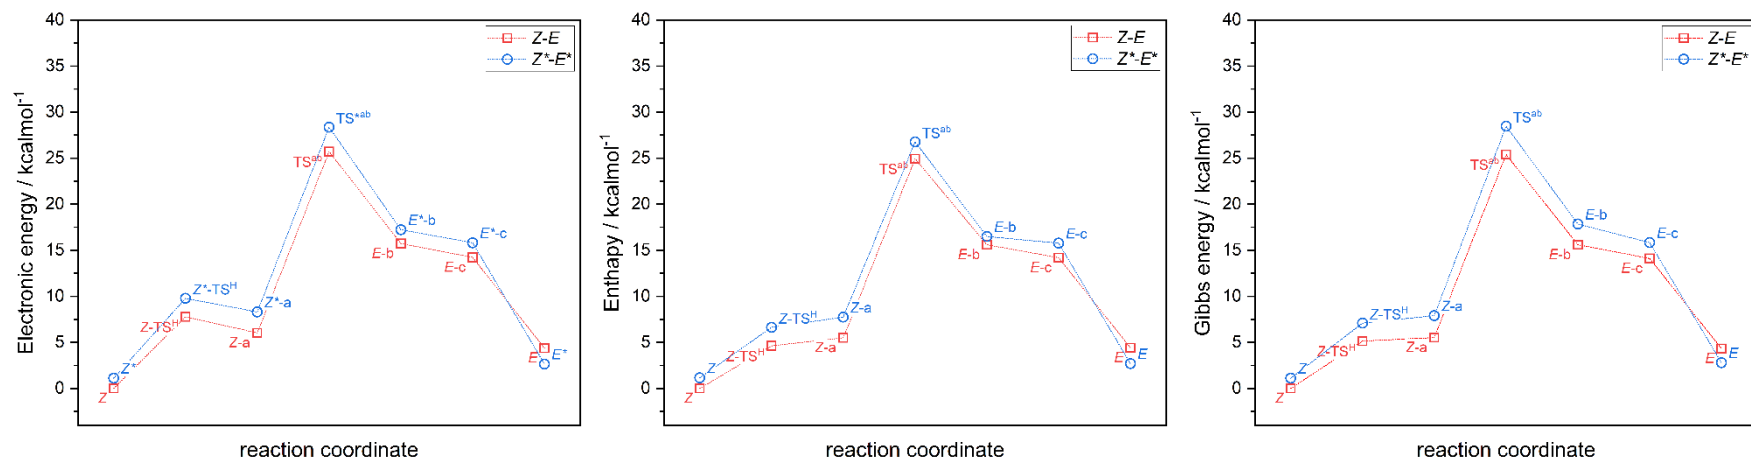

**Figure S53.** The minimal energy pathway for Z-E isomerization for **2-Br** calculated with CAM-B3LYP+D4/def2-TZVP/C-CPCM(CHCl<sub>3</sub>): relative energies, enthalpies, and Gibbs energies.



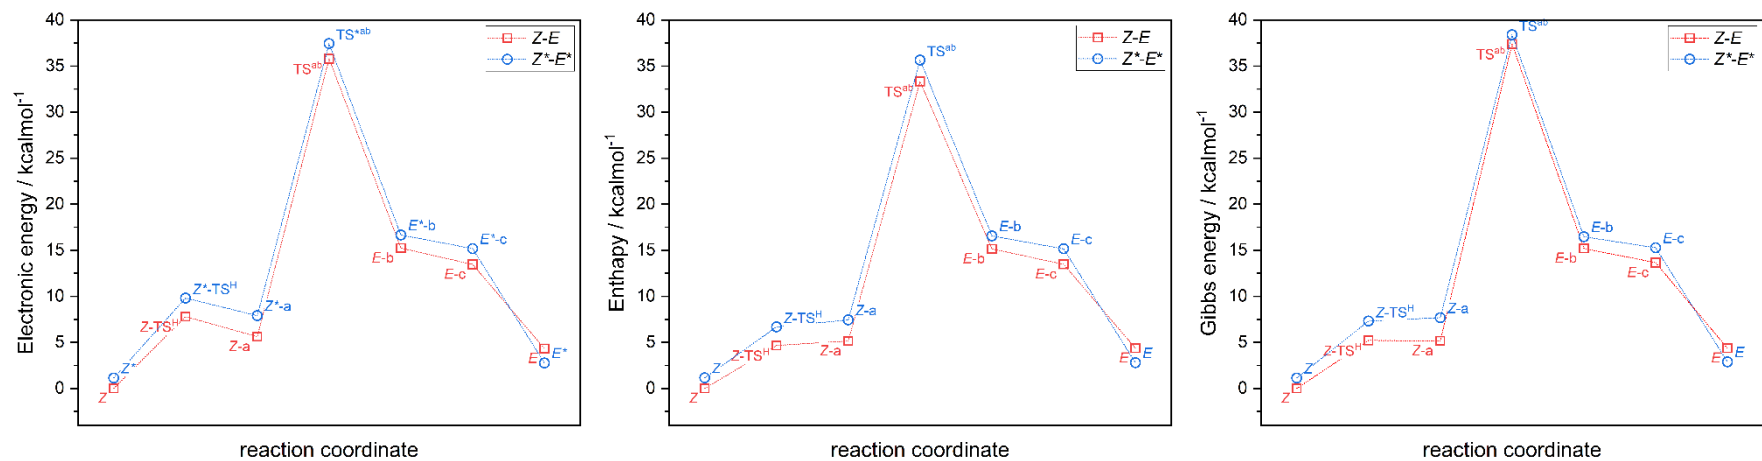

**Figure S54.** The minimal energy pathway for *Z-E* isomerization for **2-I** calculated with CAM-B3LYP+D4/def2-TZVP/C-CPCM(CHCl<sub>3</sub>): relative energies, enthalpies, and Gibbs energies.

**Table S1.** Crystal data and structure refinement for **2-Br** and **2-I**.

|                                                              | <b>2-Br</b>                                                        | <b>2-I</b>                                                         |
|--------------------------------------------------------------|--------------------------------------------------------------------|--------------------------------------------------------------------|
| Formula                                                      | C <sub>15</sub> H <sub>14</sub> BrN <sub>3</sub> O <sub>2</sub>    | C <sub>15</sub> H <sub>14</sub> IN <sub>3</sub> O <sub>2</sub>     |
| <i>M</i> <sub>r</sub>                                        | 348.201                                                            | 395.202                                                            |
| Crystal system                                               | monoclinic                                                         | monoclinic                                                         |
| Space group                                                  | <i>P</i> 2 <sub>1</sub> / <i>c</i>                                 | <i>P</i> 2 <sub>1</sub> / <i>c</i>                                 |
| <i>T</i> /K                                                  | 150.00(10)                                                         | 100.00(10)                                                         |
| <i>a</i> (Å)                                                 | 4.7716(1)                                                          | 4.6839(2)                                                          |
| <i>b</i> (Å)                                                 | 18.2538(5)                                                         | 18.5687(8)                                                         |
| <i>c</i> (Å)                                                 | 16.7147(4)                                                         | 16.9966(6)                                                         |
| $\alpha$ (°)                                                 | 90                                                                 | 90                                                                 |
| $\beta$ (°)                                                  | 97.171(2)                                                          | 95.506(4)                                                          |
| $\gamma$ (°)                                                 | 90                                                                 | 90                                                                 |
| <i>V</i> (Å <sup>3</sup> )                                   | 1444.46(6)                                                         | 1471.44(10)                                                        |
| <i>Z</i>                                                     | 4                                                                  | 4                                                                  |
| $\lambda$ (Å), Cu K $\alpha$                                 | 1.54184                                                            | 1.54184                                                            |
| <i>D</i> <sub>calc</sub> (g·cm <sup>-3</sup> )               | 1.601                                                              | 1.784                                                              |
| $\mu$ (mm <sup>-1</sup> )                                    | 3.956                                                              | 17.179                                                             |
| <i>F</i> (000)                                               | 703.4                                                              | 779.0                                                              |
| Reflections collected                                        | 10145                                                              | 7046                                                               |
| <i>R</i> <sub>int</sub> , <i>R</i> <sub>sigma</sub>          | 0.0414, 0.0353                                                     | 0.0441, 0.0390                                                     |
| Data/restraints/parameters                                   | 2653/0/191                                                         | 2730/0/191                                                         |
| Goodness-of-fit on <i>F</i> <sup>2</sup>                     | 1.033                                                              | 1.040                                                              |
| Final <i>R</i> indices [ <i>I</i> > 2 $\sigma$ ( <i>I</i> )] | <i>R</i> <sub>1</sub> = 0.0336<br>w <i>R</i> <sub>2</sub> = 0.0918 | <i>R</i> <sub>1</sub> = 0.0550<br>w <i>R</i> <sub>2</sub> = 0.1458 |
| Final <i>R</i> indices (all data)                            | <i>R</i> <sub>1</sub> = 0.0370<br>w <i>R</i> <sub>2</sub> = 0.0945 | <i>R</i> <sub>1</sub> = 0.0583<br>w <i>R</i> <sub>2</sub> = 0.1492 |
| Larg. d. peak/hole / e Å <sup>-3</sup>                       | 0.75/-0.60                                                         | 1.22/-2.12                                                         |
| CCDC no.                                                     | 2335394                                                            | 2335397                                                            |

**Table S2.** The CAM-B3LYP calculated values of  $\Delta H_{\text{iso}}^{E \rightarrow Z}$  for **2-X**.

|    | kcal/mol  | kcal/mol    |  | kJ/mol      | kJ/mol    |
|----|-----------|-------------|--|-------------|-----------|
| X= | H(E)-H(Z) | H(E*)-H(Z*) |  | H(E*)-H(Z*) | G(E)-G(Z) |
| F  | 4.52      | 1.30        |  | 18.90       | 5.43      |
| Cl | 4.45      | 1.47        |  | 18.61       | 6.16      |
| Br | 4.42      | 1.54        |  | 18.50       | 6.44      |
| I  | 4.37      | 1.64        |  | 18.27       | 6.87      |

**Table S3.** The CAM-B3LYP calculated values of  $\Delta G^{\ddagger E \rightarrow Z}$  for **2-X**.

|    | kcal/mol   | kcal/mol     |  | kJ/mol     | kJ/mol       |
|----|------------|--------------|--|------------|--------------|
| X= | G(TS)-G(E) | G(TS*)-G(E*) |  | G(TS)-G(E) | G(TS*)-G(E*) |
| F  | 23.38      | 25.98        |  | 97.84      | 108.71       |
| Cl | 28.08      | 30.49        |  | 117.50     | 127.59       |
| Br | 21.07      | 25.67        |  | 88.14      | 107.41       |
| I  | 33.02      | 35.51        |  | 138.14     | 148.57       |

**Table S4.** The isomer shifts of  $^1\text{H}$  NMR relative to TMS together with atom numbering scheme, calculated with CAM-B3LYP/PCSSEG-2/C-PCM( $\text{CHCl}_3$ ), for **2-F**.

|     |                 |       |      |                                                                                     |
|-----|-----------------|-------|------|-------------------------------------------------------------------------------------|
| Z   | Atom shift[ppm] |       |      | 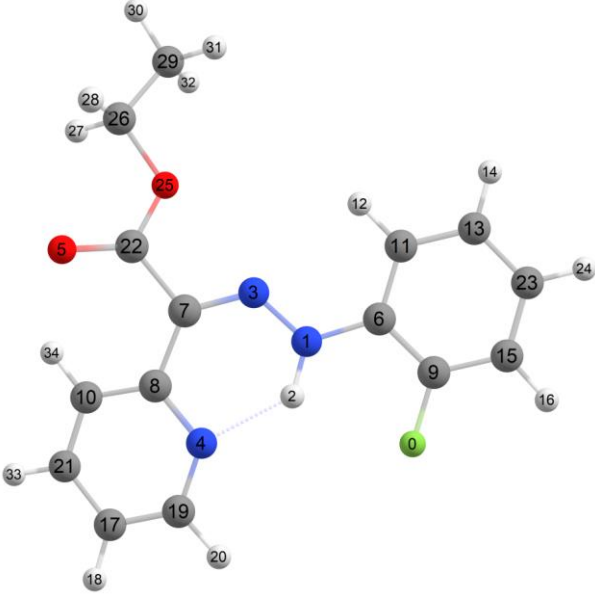  |
|     | rel.intensity   |       |      |                                                                                     |
|     | 2               | 15.65 | 1.00 |                                                                                     |
|     | 12              | 8.43  | 1.00 |                                                                                     |
|     | 14              | 7.72  | 1.00 |                                                                                     |
|     | 16              | 7.70  | 1.00 |                                                                                     |
|     | 18              | 7.78  | 1.00 |                                                                                     |
|     | 20              | 9.16  | 1.00 |                                                                                     |
|     | 24              | 7.47  | 1.00 |                                                                                     |
|     | 27              | 4.38  | 1.00 |                                                                                     |
|     | 28              | 4.30  | 1.00 |                                                                                     |
|     | 30              | 1.47  | 1.00 |                                                                                     |
|     | 31              | 1.72  | 1.00 |                                                                                     |
|     | 32              | 1.64  | 1.00 |                                                                                     |
| 33  | 8.39            | 1.00  |      |                                                                                     |
| 34  | 8.71            | 1.00  |      |                                                                                     |
| Z-a | Atom shift[ppm] |       |      |  |
|     | rel.intensity   |       |      |                                                                                     |
|     | 2               | 20.32 | 1.00 |                                                                                     |
|     | 12              | 8.60  | 1.00 |                                                                                     |
|     | 14              | 7.68  | 1.00 |                                                                                     |
|     | 16              | 7.72  | 1.00 |                                                                                     |
|     | 18              | 7.58  | 1.00 |                                                                                     |
|     | 20              | 8.47  | 1.00 |                                                                                     |
|     | 24              | 7.61  | 1.00 |                                                                                     |
|     | 27              | 4.31  | 1.00 |                                                                                     |
|     | 28              | 4.28  | 1.00 |                                                                                     |
|     | 30              | 1.45  | 1.00 |                                                                                     |
|     | 31              | 1.67  | 1.00 |                                                                                     |
|     | 32              | 1.65  | 1.00 |                                                                                     |
| 33  | 8.54            | 1.00  |      |                                                                                     |
| 34  | 9.81            | 1.00  |      |                                                                                     |

|            |    |       |      |  |
|------------|----|-------|------|--|
| <i>E-b</i> | 2  | 12.47 | 1.00 |  |
|            | 12 | 8.37  | 1.00 |  |
|            | 14 | 7.76  | 1.00 |  |
|            | 16 | 7.68  | 1.00 |  |
|            | 18 | 7.21  | 1.00 |  |
|            | 20 | 8.24  | 1.00 |  |
|            | 24 | 7.60  | 1.00 |  |
|            | 27 | 4.27  | 1.00 |  |
|            | 28 | 4.27  | 1.00 |  |
|            | 30 | 1.39  | 1.00 |  |
|            | 31 | 1.69  | 1.00 |  |
|            | 32 | 1.62  | 1.00 |  |
|            | 33 | 8.36  | 1.00 |  |
|            | 34 | 9.50  | 1.00 |  |
| <i>E-c</i> | 11 | 7.83  | 1.00 |  |
|            | 13 | 7.63  | 1.00 |  |
|            | 15 | 7.68  | 1.00 |  |
|            | 17 | 7.15  | 1.00 |  |
|            | 19 | 8.14  | 1.00 |  |
|            | 23 | 7.66  | 1.00 |  |
|            | 26 | 5.10  | 1.00 |  |
|            | 27 | 3.93  | 1.00 |  |
|            | 29 | 1.12  | 1.00 |  |
|            | 30 | 1.47  | 1.00 |  |
|            | 31 | 1.63  | 1.00 |  |
|            | 32 | 8.29  | 1.00 |  |
|            | 33 | 9.15  | 1.00 |  |
|            | 34 | 12.38 | 1.00 |  |
| <i>E</i>   | 11 | 8.30  | 1.00 |  |
|            | 13 | 7.70  | 1.00 |  |
|            | 15 | 7.67  | 1.00 |  |
|            | 17 | 7.72  | 1.00 |  |
|            | 19 | 9.11  | 1.00 |  |
|            | 23 | 7.45  | 1.00 |  |
|            | 26 | 5.23  | 1.00 |  |
|            | 27 | 4.37  | 1.00 |  |
|            | 29 | 1.26  | 1.00 |  |
|            | 30 | 1.43  | 1.00 |  |
|            | 31 | 1.64  | 1.00 |  |
|            | 32 | 8.23  | 1.00 |  |
|            | 33 | 8.02  | 1.00 |  |
|            | 34 | 11.66 | 1.00 |  |

|             |    |       |      |                                                                                                                                                                                                                                                                                                                                                                                                                                                                                                                                                                                        |
|-------------|----|-------|------|----------------------------------------------------------------------------------------------------------------------------------------------------------------------------------------------------------------------------------------------------------------------------------------------------------------------------------------------------------------------------------------------------------------------------------------------------------------------------------------------------------------------------------------------------------------------------------------|
| <i>Z*</i>   | 2  | 15.05 | 1.00 | <p>ORTEP diagram showing the crystal structure for <i>Z*</i>. The molecule consists of a central core with several substituents. Atoms are numbered 0 through 34. Atoms 1, 2, 3, and 4 are highlighted in blue. Atoms 5 and 25 are highlighted in red. Atom 0 is highlighted in green. The structure is shown with thermal ellipsoids at the 50% probability level. Displacement ellipsoids are drawn at the 50% probability level. The structure is shown with thermal ellipsoids at the 50% probability level. Displacement ellipsoids are drawn at the 50% probability level.</p>   |
|             | 12 | 8.40  | 1.00 |                                                                                                                                                                                                                                                                                                                                                                                                                                                                                                                                                                                        |
|             | 14 | 7.70  | 1.00 |                                                                                                                                                                                                                                                                                                                                                                                                                                                                                                                                                                                        |
|             | 16 | 7.67  | 1.00 |                                                                                                                                                                                                                                                                                                                                                                                                                                                                                                                                                                                        |
|             | 18 | 7.78  | 1.00 |                                                                                                                                                                                                                                                                                                                                                                                                                                                                                                                                                                                        |
|             | 20 | 9.18  | 1.00 |                                                                                                                                                                                                                                                                                                                                                                                                                                                                                                                                                                                        |
|             | 24 | 7.43  | 1.00 |                                                                                                                                                                                                                                                                                                                                                                                                                                                                                                                                                                                        |
|             | 27 | 4.46  | 1.00 |                                                                                                                                                                                                                                                                                                                                                                                                                                                                                                                                                                                        |
|             | 28 | 4.31  | 1.00 |                                                                                                                                                                                                                                                                                                                                                                                                                                                                                                                                                                                        |
|             | 30 | 1.38  | 1.00 |                                                                                                                                                                                                                                                                                                                                                                                                                                                                                                                                                                                        |
|             | 31 | 1.40  | 1.00 |                                                                                                                                                                                                                                                                                                                                                                                                                                                                                                                                                                                        |
|             | 32 | 1.52  | 1.00 |                                                                                                                                                                                                                                                                                                                                                                                                                                                                                                                                                                                        |
|             | 33 | 8.37  | 1.00 |                                                                                                                                                                                                                                                                                                                                                                                                                                                                                                                                                                                        |
|             | 34 | 8.18  | 1.00 |                                                                                                                                                                                                                                                                                                                                                                                                                                                                                                                                                                                        |
| <i>Z*-a</i> | 2  | 20.76 | 1.00 | <p>ORTEP diagram showing the crystal structure for <i>Z*-a</i>. The molecule consists of a central core with several substituents. Atoms are numbered 0 through 34. Atoms 1, 2, 3, and 4 are highlighted in blue. Atoms 5 and 25 are highlighted in red. Atom 0 is highlighted in green. The structure is shown with thermal ellipsoids at the 50% probability level. Displacement ellipsoids are drawn at the 50% probability level. The structure is shown with thermal ellipsoids at the 50% probability level. Displacement ellipsoids are drawn at the 50% probability level.</p> |
|             | 12 | 8.66  | 1.00 |                                                                                                                                                                                                                                                                                                                                                                                                                                                                                                                                                                                        |
|             | 14 | 7.69  | 1.00 |                                                                                                                                                                                                                                                                                                                                                                                                                                                                                                                                                                                        |
|             | 16 | 7.70  | 1.00 |                                                                                                                                                                                                                                                                                                                                                                                                                                                                                                                                                                                        |
|             | 18 | 7.53  | 1.00 |                                                                                                                                                                                                                                                                                                                                                                                                                                                                                                                                                                                        |
|             | 20 | 8.48  | 1.00 |                                                                                                                                                                                                                                                                                                                                                                                                                                                                                                                                                                                        |
|             | 24 | 7.61  | 1.00 |                                                                                                                                                                                                                                                                                                                                                                                                                                                                                                                                                                                        |
|             | 27 | 4.48  | 1.00 |                                                                                                                                                                                                                                                                                                                                                                                                                                                                                                                                                                                        |
|             | 28 | 4.36  | 1.00 |                                                                                                                                                                                                                                                                                                                                                                                                                                                                                                                                                                                        |
|             | 30 | 1.49  | 1.00 |                                                                                                                                                                                                                                                                                                                                                                                                                                                                                                                                                                                        |
|             | 31 | 1.64  | 1.00 |                                                                                                                                                                                                                                                                                                                                                                                                                                                                                                                                                                                        |
|             | 32 | 1.71  | 1.00 |                                                                                                                                                                                                                                                                                                                                                                                                                                                                                                                                                                                        |
|             | 33 | 8.48  | 1.00 |                                                                                                                                                                                                                                                                                                                                                                                                                                                                                                                                                                                        |
|             | 34 | 9.08  | 1.00 |                                                                                                                                                                                                                                                                                                                                                                                                                                                                                                                                                                                        |
| <i>E*-b</i> | 2  | 12.34 | 1.00 | <p>ORTEP diagram showing the crystal structure for <i>E*-b</i>. The molecule consists of a central core with several substituents. Atoms are numbered 0 through 34. Atoms 1, 2, 3, and 4 are highlighted in blue. Atoms 5 and 25 are highlighted in red. Atom 0 is highlighted in green. The structure is shown with thermal ellipsoids at the 50% probability level. Displacement ellipsoids are drawn at the 50% probability level. The structure is shown with thermal ellipsoids at the 50% probability level. Displacement ellipsoids are drawn at the 50% probability level.</p> |
|             | 12 | 8.36  | 1.00 |                                                                                                                                                                                                                                                                                                                                                                                                                                                                                                                                                                                        |
|             | 14 | 7.75  | 1.00 |                                                                                                                                                                                                                                                                                                                                                                                                                                                                                                                                                                                        |
|             | 16 | 7.66  | 1.00 |                                                                                                                                                                                                                                                                                                                                                                                                                                                                                                                                                                                        |
|             | 18 | 7.12  | 1.00 |                                                                                                                                                                                                                                                                                                                                                                                                                                                                                                                                                                                        |
|             | 20 | 8.19  | 1.00 |                                                                                                                                                                                                                                                                                                                                                                                                                                                                                                                                                                                        |
|             | 24 | 7.59  | 1.00 |                                                                                                                                                                                                                                                                                                                                                                                                                                                                                                                                                                                        |
|             | 27 | 4.31  | 1.00 |                                                                                                                                                                                                                                                                                                                                                                                                                                                                                                                                                                                        |
|             | 28 | 4.22  | 1.00 |                                                                                                                                                                                                                                                                                                                                                                                                                                                                                                                                                                                        |
|             | 30 | 1.44  | 1.00 |                                                                                                                                                                                                                                                                                                                                                                                                                                                                                                                                                                                        |
|             | 31 | 1.55  | 1.00 |                                                                                                                                                                                                                                                                                                                                                                                                                                                                                                                                                                                        |
|             | 32 | 1.63  | 1.00 |                                                                                                                                                                                                                                                                                                                                                                                                                                                                                                                                                                                        |
|             | 33 | 8.27  | 1.00 |                                                                                                                                                                                                                                                                                                                                                                                                                                                                                                                                                                                        |
|             | 34 | 8.82  | 1.00 |                                                                                                                                                                                                                                                                                                                                                                                                                                                                                                                                                                                        |

|           |    |       |      |  |
|-----------|----|-------|------|--|
| $E^* - c$ | 11 | 7.84  | 1.00 |  |
|           | 13 | 7.60  | 1.00 |  |
|           | 15 | 7.65  | 1.00 |  |
|           | 17 | 7.04  | 1.00 |  |
|           | 19 | 8.07  | 1.00 |  |
|           | 23 | 7.65  | 1.00 |  |
|           | 26 | 5.14  | 1.00 |  |
|           | 27 | 3.95  | 1.00 |  |
|           | 29 | 1.21  | 1.00 |  |
|           | 30 | 1.43  | 1.00 |  |
|           | 31 | 1.67  | 1.00 |  |
|           | 32 | 8.17  | 1.00 |  |
|           | 33 | 8.52  | 1.00 |  |
|           | 34 | 12.08 | 1.00 |  |
| $E^*$     | 11 | 8.31  | 1.00 |  |
|           | 13 | 7.68  | 1.00 |  |
|           | 15 | 7.67  | 1.00 |  |
|           | 17 | 7.72  | 1.00 |  |
|           | 19 | 9.11  | 1.00 |  |
|           | 23 | 7.46  | 1.00 |  |
|           | 26 | 5.04  | 1.00 |  |
|           | 27 | 3.95  | 1.00 |  |
|           | 29 | 1.26  | 1.00 |  |
|           | 30 | 1.48  | 1.00 |  |
|           | 31 | 1.78  | 1.00 |  |
|           | 32 | 8.24  | 1.00 |  |
|           | 33 | 8.02  | 1.00 |  |
|           | 34 | 13.34 | 1.00 |  |

**Table S5.** The isomer shifts of  $^1\text{H}$  NMR relative to TMS together with atom numbering scheme, calculated with CAM-B3LYP/PCSSEG-2/C-PCM( $\text{CHCl}_3$ ), for **2-Cl**.

|     |                                                                                                                                                                                                                                                                                           |                                                                                     |
|-----|-------------------------------------------------------------------------------------------------------------------------------------------------------------------------------------------------------------------------------------------------------------------------------------------|-------------------------------------------------------------------------------------|
| Z   | <p>Atom shift[ppm]<br/>rel.intensity</p> <p>2 15.81 1.00<br/>12 8.46 1.00<br/>14 7.83 1.00<br/>16 7.94 1.00<br/>18 7.79 1.00<br/>20 9.21 1.00<br/>24 7.46 1.00<br/>27 4.38 1.00<br/>28 4.31 1.00<br/>30 1.48 1.00<br/>31 1.72 1.00<br/>32 1.65 1.00<br/>33 8.40 1.00<br/>34 8.71 1.00</p> | 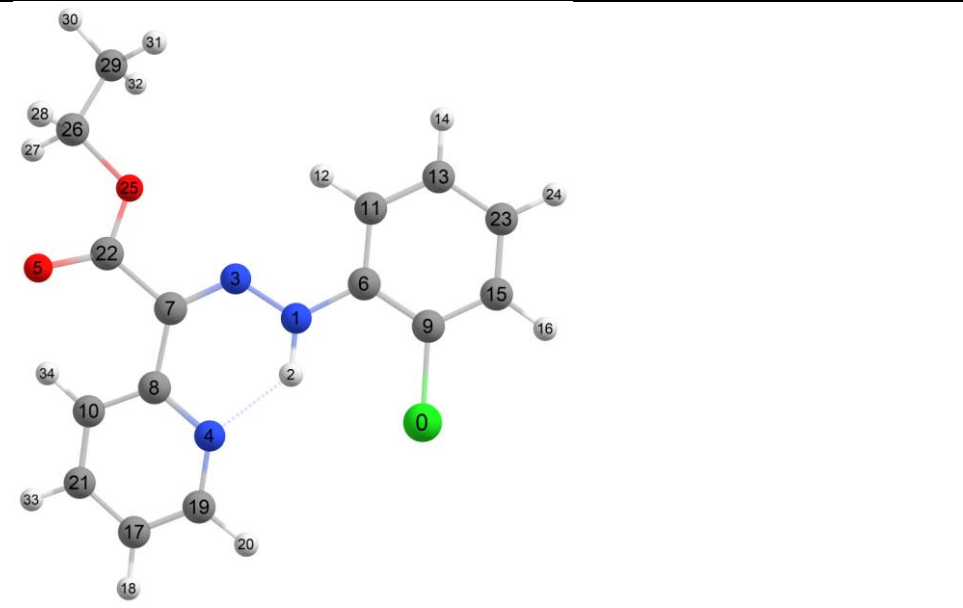  |
| Z-a | <p>2 20.48 1.00<br/>12 8.59 1.00<br/>14 7.80 1.00<br/>16 8.00 1.00<br/>18 7.61 1.00<br/>20 8.56 1.00<br/>24 7.58 1.00<br/>27 4.32 1.00<br/>28 4.29 1.00<br/>30 1.45 1.00<br/>31 1.65 1.00<br/>32 1.66 1.00<br/>33 8.57 1.00<br/>34 9.83 1.00</p>                                          |  |

|            |                                                                                                                                                                                                                               |  |
|------------|-------------------------------------------------------------------------------------------------------------------------------------------------------------------------------------------------------------------------------|--|
| <i>E-b</i> | 2 12.61 1.00<br>12 7.89 1.00<br>14 7.81 1.00<br>16 7.94 1.00<br>18 7.21 1.00<br>20 8.13 1.00<br>24 7.56 1.00<br>27 4.26 1.00<br>28 4.24 1.00<br>30 1.34 1.00<br>31 1.49 1.00<br>32 1.60 1.00<br>33 8.37 1.00<br>34 9.60 1.00  |  |
| <i>E-c</i> | 11 7.74 2.00<br>15 7.96 1.00<br>17 7.17 1.00<br>19 8.15 1.00<br>23 7.60 1.00<br>26 5.13 1.00<br>27 3.96 1.00<br>29 1.13 1.00<br>30 1.53 1.00<br>31 1.63 1.00<br>32 8.31 1.00<br>33 9.18 1.00<br>34 12.43 1.00                 |  |
| <i>E</i>   | 11 8.34 1.00<br>13 7.83 1.00<br>15 7.92 1.00<br>17 7.72 1.00<br>19 9.11 1.00<br>23 7.44 1.00<br>26 5.30 1.00<br>27 4.39 1.00<br>29 1.27 1.00<br>30 1.50 1.00<br>31 1.63 1.00<br>32 8.23 1.00<br>33 7.99 1.00<br>34 11.92 1.00 |  |



|         |    |       |      |  |
|---------|----|-------|------|--|
| $Z^*$   | 2  | 15.18 | 1.00 |  |
|         | 12 | 8.44  | 1.00 |  |
|         | 14 | 7.82  | 1.00 |  |
|         | 16 | 7.92  | 1.00 |  |
|         | 18 | 7.79  | 1.00 |  |
|         | 20 | 9.22  | 1.00 |  |
|         | 24 | 7.42  | 1.00 |  |
|         | 27 | 4.47  | 1.00 |  |
|         | 28 | 4.31  | 1.00 |  |
|         | 30 | 1.38  | 1.00 |  |
|         | 31 | 1.40  | 1.00 |  |
|         | 32 | 1.52  | 1.00 |  |
|         | 33 | 8.39  | 1.00 |  |
|         | 34 | 8.19  | 1.00 |  |
| $Z^*-a$ | 2  | 20.88 | 1.00 |  |
|         | 12 | 8.68  | 1.00 |  |
|         | 14 | 7.81  | 1.00 |  |
|         | 16 | 7.99  | 1.00 |  |
|         | 18 | 7.56  | 1.00 |  |
|         | 20 | 8.58  | 1.00 |  |
|         | 24 | 7.57  | 1.00 |  |
|         | 27 | 4.49  | 1.00 |  |
|         | 28 | 4.36  | 1.00 |  |
|         | 30 | 1.49  | 1.00 |  |
|         | 31 | 1.63  | 1.00 |  |
|         | 32 | 1.72  | 1.00 |  |
|         | 33 | 8.50  | 1.00 |  |
|         | 34 | 9.07  | 1.00 |  |
| $E^*-b$ | 2  | 12.76 | 1.00 |  |
|         | 12 | 7.95  | 1.00 |  |
|         | 14 | 7.82  | 1.00 |  |
|         | 16 | 7.93  | 1.00 |  |
|         | 18 | 7.18  | 1.00 |  |
|         | 20 | 8.14  | 1.00 |  |
|         | 24 | 7.57  | 1.00 |  |
|         | 27 | 4.29  | 1.00 |  |
|         | 28 | 4.23  | 1.00 |  |
|         | 30 | 1.47  | 1.00 |  |
|         | 31 | 1.63  | 1.00 |  |
|         | 32 | 1.64  | 1.00 |  |
|         | 33 | 8.34  | 1.00 |  |
|         | 34 | 9.07  | 1.00 |  |

|         |    |       |      |  |
|---------|----|-------|------|--|
| $E^*-c$ | 11 | 7.70  | 1.00 |  |
|         | 13 | 7.72  | 1.00 |  |
|         | 15 | 7.93  | 1.00 |  |
|         | 17 | 7.05  | 1.00 |  |
|         | 19 | 8.07  | 1.00 |  |
|         | 23 | 7.60  | 1.00 |  |
|         | 26 | 5.15  | 1.00 |  |
|         | 27 | 3.96  | 1.00 |  |
|         | 29 | 1.22  | 1.00 |  |
|         | 30 | 1.43  | 1.00 |  |
|         | 31 | 1.68  | 1.00 |  |
|         | 32 | 8.19  | 1.00 |  |
|         | 33 | 8.53  | 1.00 |  |
|         | 34 | 12.10 | 1.00 |  |
| $E^*$   | 11 | 8.35  | 1.00 |  |
|         | 13 | 7.79  | 1.00 |  |
|         | 15 | 7.92  | 1.00 |  |
|         | 17 | 7.73  | 1.00 |  |
|         | 19 | 9.11  | 1.00 |  |
|         | 23 | 7.45  | 1.00 |  |
|         | 26 | 5.05  | 1.00 |  |
|         | 27 | 3.97  | 1.00 |  |
|         | 29 | 1.27  | 1.00 |  |
|         | 30 | 1.49  | 1.00 |  |
|         | 31 | 1.80  | 1.00 |  |
|         | 32 | 8.25  | 1.00 |  |
|         | 33 | 8.02  | 1.00 |  |
|         | 34 | 13.50 | 1.00 |  |

**Table S6.** The isomer shifts of  $^1\text{H}$  NMR relative to TMS together with atom numbering scheme, calculated with CAM-B3LYP/PCSSEG-2/C-PCM( $\text{CHCl}_3$ ), for **2-Br**.

|     |                 |            |                                                                                     |
|-----|-----------------|------------|-------------------------------------------------------------------------------------|
| Z   | Atom shift[ppm] |            | 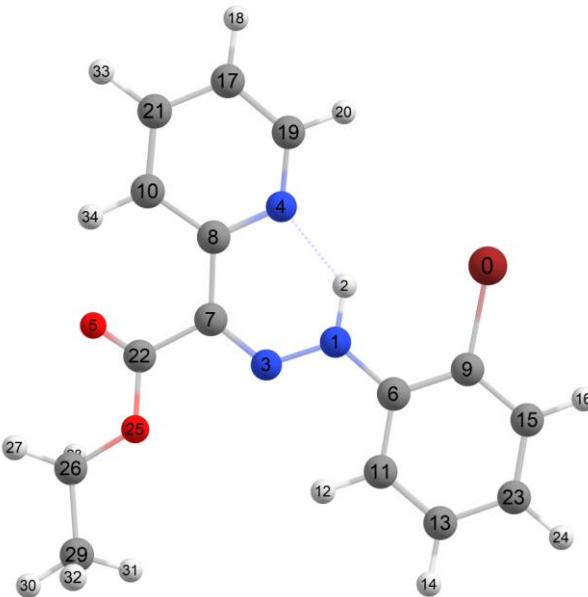  |
|     | rel.intensity   |            |                                                                                     |
|     | 2               | 15.85 1.00 |                                                                                     |
|     | 12              | 8.49 1.00  |                                                                                     |
|     | 14              | 7.88 1.00  |                                                                                     |
|     | 16              | 8.01 1.00  |                                                                                     |
|     | 18              | 7.79 1.00  |                                                                                     |
|     | 20              | 9.23 1.00  |                                                                                     |
|     | 24              | 7.44 1.00  |                                                                                     |
|     | 27              | 4.39 1.00  |                                                                                     |
|     | 28              | 4.31 1.00  |                                                                                     |
|     | 30              | 1.48 1.00  |                                                                                     |
|     | 31              | 1.72 1.00  |                                                                                     |
|     | 32              | 1.65 1.00  |                                                                                     |
|     | 33              | 8.40 1.00  |                                                                                     |
| 34  | 8.71 1.00       |            |                                                                                     |
| Z-a | 2               | 20.29 1.00 |  |
|     | 12              | 8.62 1.00  |                                                                                     |
|     | 14              | 7.84 1.00  |                                                                                     |
|     | 16              | 8.08 1.00  |                                                                                     |
|     | 18              | 7.62 1.00  |                                                                                     |
|     | 20              | 8.61 1.00  |                                                                                     |
|     | 24              | 7.56 1.00  |                                                                                     |
|     | 27              | 4.32 1.00  |                                                                                     |
|     | 28              | 4.29 1.00  |                                                                                     |
|     | 30              | 1.46 1.00  |                                                                                     |
|     | 31              | 1.65 1.00  |                                                                                     |
|     | 32              | 1.67 1.00  |                                                                                     |
|     | 33              | 8.58 1.00  |                                                                                     |
|     | 34              | 9.84 1.00  |                                                                                     |

|             |                                                                                                                                                                                                                               |  |
|-------------|-------------------------------------------------------------------------------------------------------------------------------------------------------------------------------------------------------------------------------|--|
| <i>E</i> -b | 2 12.62 1.00<br>12 7.86 1.00<br>14 7.85 1.00<br>16 8.02 1.00<br>18 7.21 1.00<br>20 8.13 1.00<br>24 7.56 1.00<br>27 4.26 1.00<br>28 4.25 1.00<br>30 1.33 1.00<br>31 1.48 1.00<br>32 1.59 1.00<br>33 8.37 1.00<br>34 9.59 1.00  |  |
| <i>E</i> -c | 11 7.77 1.00<br>13 7.79 1.00<br>15 8.07 1.00<br>17 7.18 1.00<br>19 8.16 1.00<br>23 7.58 1.00<br>26 5.13 1.00<br>27 3.97 1.00<br>29 1.13 1.00<br>30 1.58 1.00<br>31 1.62 1.00<br>32 8.31 1.00<br>33 9.18 1.00<br>34 12.44 1.00 |  |
| <i>E</i>    | 11 8.37 1.00<br>13 7.87 1.00<br>15 7.98 1.00<br>17 7.72 1.00<br>19 9.11 1.00<br>23 7.42 1.00<br>26 5.31 1.00<br>27 4.40 1.00<br>29 1.27 1.00<br>30 1.54 1.00<br>31 1.63 1.00<br>32 8.24 1.00<br>33 8.00 1.00<br>34 11.97 1.00 |  |

|             |    |       |      |  |
|-------------|----|-------|------|--|
| <i>Z*</i>   | 2  | 15.23 | 1.00 |  |
|             | 12 | 8.48  | 1.00 |  |
|             | 14 | 7.87  | 1.00 |  |
|             | 16 | 7.98  | 1.00 |  |
|             | 18 | 7.80  | 1.00 |  |
|             | 20 | 9.24  | 1.00 |  |
|             | 24 | 7.40  | 1.00 |  |
|             | 27 | 4.48  | 1.00 |  |
|             | 28 | 4.32  | 1.00 |  |
|             | 30 | 1.39  | 1.00 |  |
|             | 31 | 1.41  | 1.00 |  |
|             | 32 | 1.53  | 1.00 |  |
|             | 33 | 8.39  | 1.00 |  |
|             | 34 | 8.20  | 1.00 |  |
| <i>Z*-a</i> | 2  | 20.64 | 1.00 |  |
|             | 12 | 8.71  | 1.00 |  |
|             | 14 | 7.85  | 1.00 |  |
|             | 16 | 8.06  | 1.00 |  |
|             | 18 | 7.56  | 1.00 |  |
|             | 20 | 8.63  | 1.00 |  |
|             | 24 | 7.55  | 1.00 |  |
|             | 27 | 4.49  | 1.00 |  |
|             | 28 | 4.36  | 1.00 |  |
|             | 30 | 1.49  | 1.00 |  |
|             | 31 | 1.63  | 1.00 |  |
|             | 32 | 1.72  | 1.00 |  |
|             | 33 | 8.51  | 1.00 |  |
|             | 34 | 9.05  | 1.00 |  |
| <i>E*-b</i> | 2  | 12.81 | 1.00 |  |
|             | 12 | 7.90  | 1.00 |  |
|             | 14 | 7.85  | 1.00 |  |
|             | 16 | 8.02  | 1.00 |  |
|             | 18 | 7.18  | 1.00 |  |
|             | 20 | 8.14  | 1.00 |  |
|             | 24 | 7.56  | 1.00 |  |
|             | 27 | 4.27  | 1.00 |  |
|             | 28 | 4.26  | 1.00 |  |
|             | 30 | 1.47  | 1.00 |  |
|             | 31 | 1.64  | 1.00 |  |
|             | 32 | 1.64  | 1.00 |  |
|             | 33 | 8.35  | 1.00 |  |
|             | 34 | 9.09  | 1.00 |  |

|         |    |       |      |                                                                                     |
|---------|----|-------|------|-------------------------------------------------------------------------------------|
| $E^*-c$ | 11 | 7.73  | 1.00 | 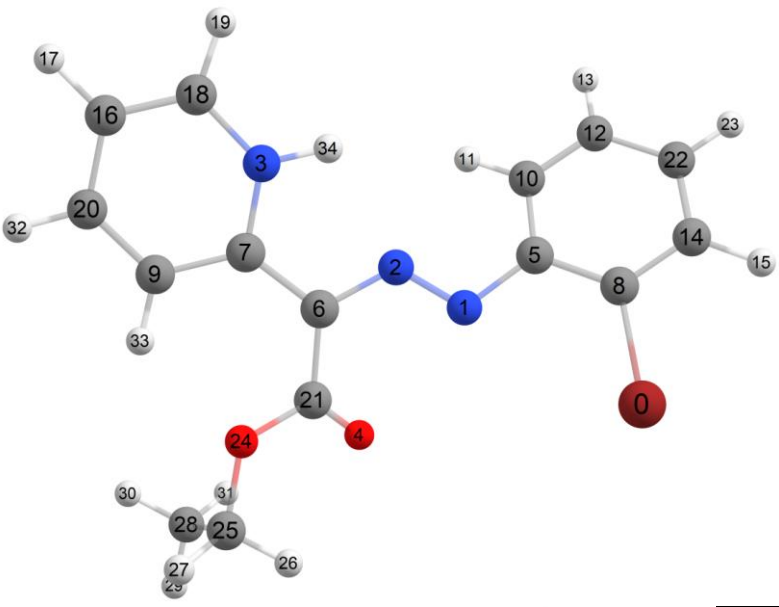  |
|         | 13 | 7.77  | 1.00 |                                                                                     |
|         | 15 | 8.04  | 1.00 |                                                                                     |
|         | 17 | 7.06  | 1.00 |                                                                                     |
|         | 19 | 8.07  | 1.00 |                                                                                     |
|         | 23 | 7.57  | 1.00 |                                                                                     |
|         | 26 | 5.15  | 1.00 |                                                                                     |
|         | 27 | 3.96  | 1.00 |                                                                                     |
|         | 29 | 1.22  | 1.00 |                                                                                     |
|         | 30 | 1.44  | 1.00 |                                                                                     |
|         | 31 | 1.69  | 1.00 |                                                                                     |
|         | 32 | 8.19  | 1.00 |                                                                                     |
|         | 33 | 8.50  | 1.00 |                                                                                     |
|         | 34 | 12.09 | 1.00 |                                                                                     |
| $E^*$   | 11 | 8.39  | 1.00 |  |
|         | 13 | 7.84  | 1.00 |                                                                                     |
|         | 15 | 7.99  | 1.00 |                                                                                     |
|         | 17 | 7.73  | 1.00 |                                                                                     |
|         | 19 | 9.12  | 1.00 |                                                                                     |
|         | 23 | 7.44  | 1.00 |                                                                                     |
|         | 26 | 5.05  | 1.00 |                                                                                     |
|         | 27 | 3.97  | 1.00 |                                                                                     |
|         | 29 | 1.27  | 1.00 |                                                                                     |
|         | 30 | 1.50  | 1.00 |                                                                                     |
|         | 31 | 1.81  | 1.00 |                                                                                     |
|         | 32 | 8.25  | 1.00 |                                                                                     |
|         | 33 | 8.02  | 1.00 |                                                                                     |
|         | 34 | 13.50 | 1.00 |                                                                                     |

**Table S7.** The isomer shifts of  $^1\text{H}$  NMR relative to TMS together with atom numbering scheme, calculated with CAM-B3LYP/PCSSEG-2/C-PCM( $\text{CHCl}_3$ ), for **2-I**.

|     |                 |       |      |                                                                                     |
|-----|-----------------|-------|------|-------------------------------------------------------------------------------------|
| Z   | Atom shift[ppm] |       |      | 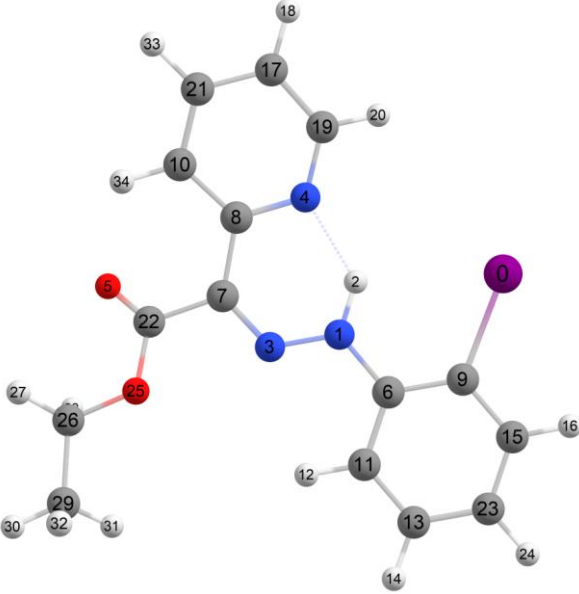  |
|     | rel.intensity   |       |      |                                                                                     |
|     | 2               | 15.82 | 1.00 |                                                                                     |
|     | 12              | 8.51  | 1.00 |                                                                                     |
|     | 14              | 7.90  | 1.00 |                                                                                     |
|     | 16              | 8.09  | 1.00 |                                                                                     |
|     | 18              | 7.80  | 1.00 |                                                                                     |
|     | 20              | 9.28  | 1.00 |                                                                                     |
|     | 24              | 7.40  | 1.00 |                                                                                     |
|     | 27              | 4.39  | 1.00 |                                                                                     |
|     | 28              | 4.31  | 1.00 |                                                                                     |
|     | 30              | 1.48  | 1.00 |                                                                                     |
|     | 31              | 1.72  | 1.00 |                                                                                     |
|     | 32              | 1.65  | 1.00 |                                                                                     |
| 33  | 8.41            | 1.00  |      |                                                                                     |
| 34  | 8.71            | 1.00  |      |                                                                                     |
| Z-a | 2               | 19.93 | 1.00 |  |
|     | 12              | 8.63  | 1.00 |                                                                                     |
|     | 14              | 7.87  | 1.00 |                                                                                     |
|     | 16              | 8.17  | 1.00 |                                                                                     |
|     | 18              | 7.61  | 1.00 |                                                                                     |
|     | 20              | 8.71  | 1.00 |                                                                                     |
|     | 24              | 7.52  | 1.00 |                                                                                     |
|     | 27              | 4.31  | 1.00 |                                                                                     |
|     | 28              | 4.29  | 1.00 |                                                                                     |
|     | 30              | 1.46  | 1.00 |                                                                                     |
|     | 31              | 1.66  | 1.00 |                                                                                     |
|     | 32              | 1.67  | 1.00 |                                                                                     |
|     | 33              | 8.58  | 1.00 |                                                                                     |
|     | 34              | 9.85  | 1.00 |                                                                                     |

|            |                                                                                                                                                                                                                                                                                                                                                                                                                                                                                                                                                                                                                                                                                                                                 |      |       |      |    |      |      |    |      |      |    |      |      |    |      |      |    |      |      |    |      |      |    |      |      |    |      |      |    |      |      |    |      |      |    |      |      |    |      |      |    |       |      |  |
|------------|---------------------------------------------------------------------------------------------------------------------------------------------------------------------------------------------------------------------------------------------------------------------------------------------------------------------------------------------------------------------------------------------------------------------------------------------------------------------------------------------------------------------------------------------------------------------------------------------------------------------------------------------------------------------------------------------------------------------------------|------|-------|------|----|------|------|----|------|------|----|------|------|----|------|------|----|------|------|----|------|------|----|------|------|----|------|------|----|------|------|----|------|------|----|------|------|----|------|------|----|-------|------|--|
| <i>E-b</i> | <table border="1"> <tbody> <tr><td>2</td><td>12.47</td><td>1.00</td></tr> <tr><td>12</td><td>7.78</td><td>1.00</td></tr> <tr><td>14</td><td>7.86</td><td>1.00</td></tr> <tr><td>16</td><td>8.10</td><td>1.00</td></tr> <tr><td>18</td><td>7.21</td><td>1.00</td></tr> <tr><td>20</td><td>8.11</td><td>1.00</td></tr> <tr><td>24</td><td>7.54</td><td>1.00</td></tr> <tr><td>27</td><td>4.27</td><td>1.00</td></tr> <tr><td>28</td><td>4.24</td><td>1.00</td></tr> <tr><td>30</td><td>1.32</td><td>1.00</td></tr> <tr><td>31</td><td>1.46</td><td>1.00</td></tr> <tr><td>32</td><td>1.57</td><td>1.00</td></tr> <tr><td>33</td><td>8.36</td><td>1.00</td></tr> <tr><td>34</td><td>9.55</td><td>1.00</td></tr> </tbody> </table>  | 2    | 12.47 | 1.00 | 12 | 7.78 | 1.00 | 14 | 7.86 | 1.00 | 16 | 8.10 | 1.00 | 18 | 7.21 | 1.00 | 20 | 8.11 | 1.00 | 24 | 7.54 | 1.00 | 27 | 4.27 | 1.00 | 28 | 4.24 | 1.00 | 30 | 1.32 | 1.00 | 31 | 1.46 | 1.00 | 32 | 1.57 | 1.00 | 33 | 8.36 | 1.00 | 34 | 9.55  | 1.00 |  |
| 2          | 12.47                                                                                                                                                                                                                                                                                                                                                                                                                                                                                                                                                                                                                                                                                                                           | 1.00 |       |      |    |      |      |    |      |      |    |      |      |    |      |      |    |      |      |    |      |      |    |      |      |    |      |      |    |      |      |    |      |      |    |      |      |    |      |      |    |       |      |  |
| 12         | 7.78                                                                                                                                                                                                                                                                                                                                                                                                                                                                                                                                                                                                                                                                                                                            | 1.00 |       |      |    |      |      |    |      |      |    |      |      |    |      |      |    |      |      |    |      |      |    |      |      |    |      |      |    |      |      |    |      |      |    |      |      |    |      |      |    |       |      |  |
| 14         | 7.86                                                                                                                                                                                                                                                                                                                                                                                                                                                                                                                                                                                                                                                                                                                            | 1.00 |       |      |    |      |      |    |      |      |    |      |      |    |      |      |    |      |      |    |      |      |    |      |      |    |      |      |    |      |      |    |      |      |    |      |      |    |      |      |    |       |      |  |
| 16         | 8.10                                                                                                                                                                                                                                                                                                                                                                                                                                                                                                                                                                                                                                                                                                                            | 1.00 |       |      |    |      |      |    |      |      |    |      |      |    |      |      |    |      |      |    |      |      |    |      |      |    |      |      |    |      |      |    |      |      |    |      |      |    |      |      |    |       |      |  |
| 18         | 7.21                                                                                                                                                                                                                                                                                                                                                                                                                                                                                                                                                                                                                                                                                                                            | 1.00 |       |      |    |      |      |    |      |      |    |      |      |    |      |      |    |      |      |    |      |      |    |      |      |    |      |      |    |      |      |    |      |      |    |      |      |    |      |      |    |       |      |  |
| 20         | 8.11                                                                                                                                                                                                                                                                                                                                                                                                                                                                                                                                                                                                                                                                                                                            | 1.00 |       |      |    |      |      |    |      |      |    |      |      |    |      |      |    |      |      |    |      |      |    |      |      |    |      |      |    |      |      |    |      |      |    |      |      |    |      |      |    |       |      |  |
| 24         | 7.54                                                                                                                                                                                                                                                                                                                                                                                                                                                                                                                                                                                                                                                                                                                            | 1.00 |       |      |    |      |      |    |      |      |    |      |      |    |      |      |    |      |      |    |      |      |    |      |      |    |      |      |    |      |      |    |      |      |    |      |      |    |      |      |    |       |      |  |
| 27         | 4.27                                                                                                                                                                                                                                                                                                                                                                                                                                                                                                                                                                                                                                                                                                                            | 1.00 |       |      |    |      |      |    |      |      |    |      |      |    |      |      |    |      |      |    |      |      |    |      |      |    |      |      |    |      |      |    |      |      |    |      |      |    |      |      |    |       |      |  |
| 28         | 4.24                                                                                                                                                                                                                                                                                                                                                                                                                                                                                                                                                                                                                                                                                                                            | 1.00 |       |      |    |      |      |    |      |      |    |      |      |    |      |      |    |      |      |    |      |      |    |      |      |    |      |      |    |      |      |    |      |      |    |      |      |    |      |      |    |       |      |  |
| 30         | 1.32                                                                                                                                                                                                                                                                                                                                                                                                                                                                                                                                                                                                                                                                                                                            | 1.00 |       |      |    |      |      |    |      |      |    |      |      |    |      |      |    |      |      |    |      |      |    |      |      |    |      |      |    |      |      |    |      |      |    |      |      |    |      |      |    |       |      |  |
| 31         | 1.46                                                                                                                                                                                                                                                                                                                                                                                                                                                                                                                                                                                                                                                                                                                            | 1.00 |       |      |    |      |      |    |      |      |    |      |      |    |      |      |    |      |      |    |      |      |    |      |      |    |      |      |    |      |      |    |      |      |    |      |      |    |      |      |    |       |      |  |
| 32         | 1.57                                                                                                                                                                                                                                                                                                                                                                                                                                                                                                                                                                                                                                                                                                                            | 1.00 |       |      |    |      |      |    |      |      |    |      |      |    |      |      |    |      |      |    |      |      |    |      |      |    |      |      |    |      |      |    |      |      |    |      |      |    |      |      |    |       |      |  |
| 33         | 8.36                                                                                                                                                                                                                                                                                                                                                                                                                                                                                                                                                                                                                                                                                                                            | 1.00 |       |      |    |      |      |    |      |      |    |      |      |    |      |      |    |      |      |    |      |      |    |      |      |    |      |      |    |      |      |    |      |      |    |      |      |    |      |      |    |       |      |  |
| 34         | 9.55                                                                                                                                                                                                                                                                                                                                                                                                                                                                                                                                                                                                                                                                                                                            | 1.00 |       |      |    |      |      |    |      |      |    |      |      |    |      |      |    |      |      |    |      |      |    |      |      |    |      |      |    |      |      |    |      |      |    |      |      |    |      |      |    |       |      |  |
| <i>E-c</i> | <table border="1"> <tbody> <tr><td>11</td><td>7.78</td><td>1.00</td></tr> <tr><td>13</td><td>7.82</td><td>1.00</td></tr> <tr><td>15</td><td>8.18</td><td>1.00</td></tr> <tr><td>17</td><td>7.19</td><td>1.00</td></tr> <tr><td>19</td><td>8.17</td><td>1.00</td></tr> <tr><td>23</td><td>7.55</td><td>1.00</td></tr> <tr><td>26</td><td>5.13</td><td>1.00</td></tr> <tr><td>27</td><td>4.00</td><td>1.00</td></tr> <tr><td>29</td><td>1.12</td><td>1.00</td></tr> <tr><td>30</td><td>1.70</td><td>1.00</td></tr> <tr><td>31</td><td>1.63</td><td>1.00</td></tr> <tr><td>32</td><td>8.32</td><td>1.00</td></tr> <tr><td>33</td><td>9.25</td><td>1.00</td></tr> <tr><td>34</td><td>12.47</td><td>1.00</td></tr> </tbody> </table> | 11   | 7.78  | 1.00 | 13 | 7.82 | 1.00 | 15 | 8.18 | 1.00 | 17 | 7.19 | 1.00 | 19 | 8.17 | 1.00 | 23 | 7.55 | 1.00 | 26 | 5.13 | 1.00 | 27 | 4.00 | 1.00 | 29 | 1.12 | 1.00 | 30 | 1.70 | 1.00 | 31 | 1.63 | 1.00 | 32 | 8.32 | 1.00 | 33 | 9.25 | 1.00 | 34 | 12.47 | 1.00 |  |
| 11         | 7.78                                                                                                                                                                                                                                                                                                                                                                                                                                                                                                                                                                                                                                                                                                                            | 1.00 |       |      |    |      |      |    |      |      |    |      |      |    |      |      |    |      |      |    |      |      |    |      |      |    |      |      |    |      |      |    |      |      |    |      |      |    |      |      |    |       |      |  |
| 13         | 7.82                                                                                                                                                                                                                                                                                                                                                                                                                                                                                                                                                                                                                                                                                                                            | 1.00 |       |      |    |      |      |    |      |      |    |      |      |    |      |      |    |      |      |    |      |      |    |      |      |    |      |      |    |      |      |    |      |      |    |      |      |    |      |      |    |       |      |  |
| 15         | 8.18                                                                                                                                                                                                                                                                                                                                                                                                                                                                                                                                                                                                                                                                                                                            | 1.00 |       |      |    |      |      |    |      |      |    |      |      |    |      |      |    |      |      |    |      |      |    |      |      |    |      |      |    |      |      |    |      |      |    |      |      |    |      |      |    |       |      |  |
| 17         | 7.19                                                                                                                                                                                                                                                                                                                                                                                                                                                                                                                                                                                                                                                                                                                            | 1.00 |       |      |    |      |      |    |      |      |    |      |      |    |      |      |    |      |      |    |      |      |    |      |      |    |      |      |    |      |      |    |      |      |    |      |      |    |      |      |    |       |      |  |
| 19         | 8.17                                                                                                                                                                                                                                                                                                                                                                                                                                                                                                                                                                                                                                                                                                                            | 1.00 |       |      |    |      |      |    |      |      |    |      |      |    |      |      |    |      |      |    |      |      |    |      |      |    |      |      |    |      |      |    |      |      |    |      |      |    |      |      |    |       |      |  |
| 23         | 7.55                                                                                                                                                                                                                                                                                                                                                                                                                                                                                                                                                                                                                                                                                                                            | 1.00 |       |      |    |      |      |    |      |      |    |      |      |    |      |      |    |      |      |    |      |      |    |      |      |    |      |      |    |      |      |    |      |      |    |      |      |    |      |      |    |       |      |  |
| 26         | 5.13                                                                                                                                                                                                                                                                                                                                                                                                                                                                                                                                                                                                                                                                                                                            | 1.00 |       |      |    |      |      |    |      |      |    |      |      |    |      |      |    |      |      |    |      |      |    |      |      |    |      |      |    |      |      |    |      |      |    |      |      |    |      |      |    |       |      |  |
| 27         | 4.00                                                                                                                                                                                                                                                                                                                                                                                                                                                                                                                                                                                                                                                                                                                            | 1.00 |       |      |    |      |      |    |      |      |    |      |      |    |      |      |    |      |      |    |      |      |    |      |      |    |      |      |    |      |      |    |      |      |    |      |      |    |      |      |    |       |      |  |
| 29         | 1.12                                                                                                                                                                                                                                                                                                                                                                                                                                                                                                                                                                                                                                                                                                                            | 1.00 |       |      |    |      |      |    |      |      |    |      |      |    |      |      |    |      |      |    |      |      |    |      |      |    |      |      |    |      |      |    |      |      |    |      |      |    |      |      |    |       |      |  |
| 30         | 1.70                                                                                                                                                                                                                                                                                                                                                                                                                                                                                                                                                                                                                                                                                                                            | 1.00 |       |      |    |      |      |    |      |      |    |      |      |    |      |      |    |      |      |    |      |      |    |      |      |    |      |      |    |      |      |    |      |      |    |      |      |    |      |      |    |       |      |  |
| 31         | 1.63                                                                                                                                                                                                                                                                                                                                                                                                                                                                                                                                                                                                                                                                                                                            | 1.00 |       |      |    |      |      |    |      |      |    |      |      |    |      |      |    |      |      |    |      |      |    |      |      |    |      |      |    |      |      |    |      |      |    |      |      |    |      |      |    |       |      |  |
| 32         | 8.32                                                                                                                                                                                                                                                                                                                                                                                                                                                                                                                                                                                                                                                                                                                            | 1.00 |       |      |    |      |      |    |      |      |    |      |      |    |      |      |    |      |      |    |      |      |    |      |      |    |      |      |    |      |      |    |      |      |    |      |      |    |      |      |    |       |      |  |
| 33         | 9.25                                                                                                                                                                                                                                                                                                                                                                                                                                                                                                                                                                                                                                                                                                                            | 1.00 |       |      |    |      |      |    |      |      |    |      |      |    |      |      |    |      |      |    |      |      |    |      |      |    |      |      |    |      |      |    |      |      |    |      |      |    |      |      |    |       |      |  |
| 34         | 12.47                                                                                                                                                                                                                                                                                                                                                                                                                                                                                                                                                                                                                                                                                                                           | 1.00 |       |      |    |      |      |    |      |      |    |      |      |    |      |      |    |      |      |    |      |      |    |      |      |    |      |      |    |      |      |    |      |      |    |      |      |    |      |      |    |       |      |  |
| <i>E</i>   | <table border="1"> <tbody> <tr><td>11</td><td>8.39</td><td>1.00</td></tr> <tr><td>13</td><td>7.89</td><td>1.00</td></tr> <tr><td>15</td><td>8.05</td><td>1.00</td></tr> <tr><td>17</td><td>7.72</td><td>1.00</td></tr> <tr><td>19</td><td>9.11</td><td>1.00</td></tr> <tr><td>23</td><td>7.39</td><td>1.00</td></tr> <tr><td>26</td><td>5.32</td><td>1.00</td></tr> <tr><td>27</td><td>4.45</td><td>1.00</td></tr> <tr><td>29</td><td>1.27</td><td>1.00</td></tr> <tr><td>30</td><td>1.61</td><td>1.00</td></tr> <tr><td>31</td><td>1.64</td><td>1.00</td></tr> <tr><td>32</td><td>8.24</td><td>1.00</td></tr> <tr><td>33</td><td>7.99</td><td>1.00</td></tr> <tr><td>34</td><td>11.86</td><td>1.00</td></tr> </tbody> </table> | 11   | 8.39  | 1.00 | 13 | 7.89 | 1.00 | 15 | 8.05 | 1.00 | 17 | 7.72 | 1.00 | 19 | 9.11 | 1.00 | 23 | 7.39 | 1.00 | 26 | 5.32 | 1.00 | 27 | 4.45 | 1.00 | 29 | 1.27 | 1.00 | 30 | 1.61 | 1.00 | 31 | 1.64 | 1.00 | 32 | 8.24 | 1.00 | 33 | 7.99 | 1.00 | 34 | 11.86 | 1.00 |  |
| 11         | 8.39                                                                                                                                                                                                                                                                                                                                                                                                                                                                                                                                                                                                                                                                                                                            | 1.00 |       |      |    |      |      |    |      |      |    |      |      |    |      |      |    |      |      |    |      |      |    |      |      |    |      |      |    |      |      |    |      |      |    |      |      |    |      |      |    |       |      |  |
| 13         | 7.89                                                                                                                                                                                                                                                                                                                                                                                                                                                                                                                                                                                                                                                                                                                            | 1.00 |       |      |    |      |      |    |      |      |    |      |      |    |      |      |    |      |      |    |      |      |    |      |      |    |      |      |    |      |      |    |      |      |    |      |      |    |      |      |    |       |      |  |
| 15         | 8.05                                                                                                                                                                                                                                                                                                                                                                                                                                                                                                                                                                                                                                                                                                                            | 1.00 |       |      |    |      |      |    |      |      |    |      |      |    |      |      |    |      |      |    |      |      |    |      |      |    |      |      |    |      |      |    |      |      |    |      |      |    |      |      |    |       |      |  |
| 17         | 7.72                                                                                                                                                                                                                                                                                                                                                                                                                                                                                                                                                                                                                                                                                                                            | 1.00 |       |      |    |      |      |    |      |      |    |      |      |    |      |      |    |      |      |    |      |      |    |      |      |    |      |      |    |      |      |    |      |      |    |      |      |    |      |      |    |       |      |  |
| 19         | 9.11                                                                                                                                                                                                                                                                                                                                                                                                                                                                                                                                                                                                                                                                                                                            | 1.00 |       |      |    |      |      |    |      |      |    |      |      |    |      |      |    |      |      |    |      |      |    |      |      |    |      |      |    |      |      |    |      |      |    |      |      |    |      |      |    |       |      |  |
| 23         | 7.39                                                                                                                                                                                                                                                                                                                                                                                                                                                                                                                                                                                                                                                                                                                            | 1.00 |       |      |    |      |      |    |      |      |    |      |      |    |      |      |    |      |      |    |      |      |    |      |      |    |      |      |    |      |      |    |      |      |    |      |      |    |      |      |    |       |      |  |
| 26         | 5.32                                                                                                                                                                                                                                                                                                                                                                                                                                                                                                                                                                                                                                                                                                                            | 1.00 |       |      |    |      |      |    |      |      |    |      |      |    |      |      |    |      |      |    |      |      |    |      |      |    |      |      |    |      |      |    |      |      |    |      |      |    |      |      |    |       |      |  |
| 27         | 4.45                                                                                                                                                                                                                                                                                                                                                                                                                                                                                                                                                                                                                                                                                                                            | 1.00 |       |      |    |      |      |    |      |      |    |      |      |    |      |      |    |      |      |    |      |      |    |      |      |    |      |      |    |      |      |    |      |      |    |      |      |    |      |      |    |       |      |  |
| 29         | 1.27                                                                                                                                                                                                                                                                                                                                                                                                                                                                                                                                                                                                                                                                                                                            | 1.00 |       |      |    |      |      |    |      |      |    |      |      |    |      |      |    |      |      |    |      |      |    |      |      |    |      |      |    |      |      |    |      |      |    |      |      |    |      |      |    |       |      |  |
| 30         | 1.61                                                                                                                                                                                                                                                                                                                                                                                                                                                                                                                                                                                                                                                                                                                            | 1.00 |       |      |    |      |      |    |      |      |    |      |      |    |      |      |    |      |      |    |      |      |    |      |      |    |      |      |    |      |      |    |      |      |    |      |      |    |      |      |    |       |      |  |
| 31         | 1.64                                                                                                                                                                                                                                                                                                                                                                                                                                                                                                                                                                                                                                                                                                                            | 1.00 |       |      |    |      |      |    |      |      |    |      |      |    |      |      |    |      |      |    |      |      |    |      |      |    |      |      |    |      |      |    |      |      |    |      |      |    |      |      |    |       |      |  |
| 32         | 8.24                                                                                                                                                                                                                                                                                                                                                                                                                                                                                                                                                                                                                                                                                                                            | 1.00 |       |      |    |      |      |    |      |      |    |      |      |    |      |      |    |      |      |    |      |      |    |      |      |    |      |      |    |      |      |    |      |      |    |      |      |    |      |      |    |       |      |  |
| 33         | 7.99                                                                                                                                                                                                                                                                                                                                                                                                                                                                                                                                                                                                                                                                                                                            | 1.00 |       |      |    |      |      |    |      |      |    |      |      |    |      |      |    |      |      |    |      |      |    |      |      |    |      |      |    |      |      |    |      |      |    |      |      |    |      |      |    |       |      |  |
| 34         | 11.86                                                                                                                                                                                                                                                                                                                                                                                                                                                                                                                                                                                                                                                                                                                           | 1.00 |       |      |    |      |      |    |      |      |    |      |      |    |      |      |    |      |      |    |      |      |    |      |      |    |      |      |    |      |      |    |      |      |    |      |      |    |      |      |    |       |      |  |



|             |    |       |      |  |
|-------------|----|-------|------|--|
| <i>Z*</i>   | 2  | 15.15 | 1.00 |  |
|             | 12 | 8.50  | 1.00 |  |
|             | 14 | 7.88  | 1.00 |  |
|             | 16 | 8.07  | 1.00 |  |
|             | 18 | 7.80  | 1.00 |  |
|             | 20 | 9.29  | 1.00 |  |
|             | 24 | 7.37  | 1.00 |  |
|             | 27 | 4.48  | 1.00 |  |
|             | 28 | 4.31  | 1.00 |  |
|             | 30 | 1.38  | 1.00 |  |
|             | 31 | 1.41  | 1.00 |  |
|             | 32 | 1.52  | 1.00 |  |
|             | 33 | 8.39  | 1.00 |  |
|             | 34 | 8.20  | 1.00 |  |
| <i>Z*-a</i> | 2  | 20.17 | 1.00 |  |
|             | 12 | 8.71  | 1.00 |  |
|             | 14 | 7.87  | 1.00 |  |
|             | 16 | 8.15  | 1.00 |  |
|             | 18 | 7.55  | 1.00 |  |
|             | 20 | 8.73  | 1.00 |  |
|             | 24 | 7.51  | 1.00 |  |
|             | 27 | 4.50  | 1.00 |  |
|             | 28 | 4.35  | 1.00 |  |
|             | 30 | 1.48  | 1.00 |  |
|             | 31 | 1.62  | 1.00 |  |
|             | 32 | 1.71  | 1.00 |  |
|             | 33 | 8.50  | 1.00 |  |
|             | 34 | 9.04  | 1.00 |  |
| <i>E*-b</i> | 2  | 12.35 | 1.00 |  |
|             | 12 | 7.76  | 1.00 |  |
|             | 14 | 7.84  | 1.00 |  |
|             | 16 | 8.09  | 1.00 |  |
|             | 18 | 7.10  | 1.00 |  |
|             | 20 | 8.06  | 1.00 |  |
|             | 24 | 7.52  | 1.00 |  |
|             | 27 | 4.25  | 1.00 |  |
|             | 28 | 4.32  | 1.00 |  |
|             | 30 | 1.44  | 1.00 |  |
|             | 31 | 1.63  | 1.00 |  |
|             | 32 | 1.55  | 1.00 |  |
|             | 33 | 8.26  | 1.00 |  |
|             | 34 | 8.76  | 1.00 |  |

|         |    |       |      |  |
|---------|----|-------|------|--|
| $E^*-c$ | 11 | 7.68  | 1.00 |  |
|         | 13 | 7.79  | 1.00 |  |
|         | 15 | 8.14  | 1.00 |  |
|         | 17 | 7.06  | 1.00 |  |
|         | 19 | 8.07  | 1.00 |  |
|         | 23 | 7.54  | 1.00 |  |
|         | 26 | 5.16  | 1.00 |  |
|         | 27 | 3.96  | 1.00 |  |
|         | 29 | 1.22  | 1.00 |  |
|         | 30 | 1.43  | 1.00 |  |
|         | 31 | 1.69  | 1.00 |  |
|         | 32 | 8.20  | 1.00 |  |
|         | 33 | 8.53  | 1.00 |  |
|         | 34 | 12.08 | 1.00 |  |
| $E^*$   | 11 | 8.40  | 1.00 |  |
|         | 13 | 7.86  | 1.00 |  |
|         | 15 | 8.07  | 1.00 |  |
|         | 17 | 7.73  | 1.00 |  |
|         | 19 | 9.12  | 1.00 |  |
|         | 23 | 7.40  | 1.00 |  |
|         | 26 | 5.06  | 1.00 |  |
|         | 27 | 3.97  | 1.00 |  |
|         | 29 | 1.27  | 1.00 |  |
|         | 30 | 1.50  | 1.00 |  |
|         | 31 | 1.82  | 1.00 |  |
|         | 32 | 8.25  | 1.00 |  |
|         | 33 | 8.02  | 1.00 |  |
|         | 34 | 13.38 | 1.00 |  |

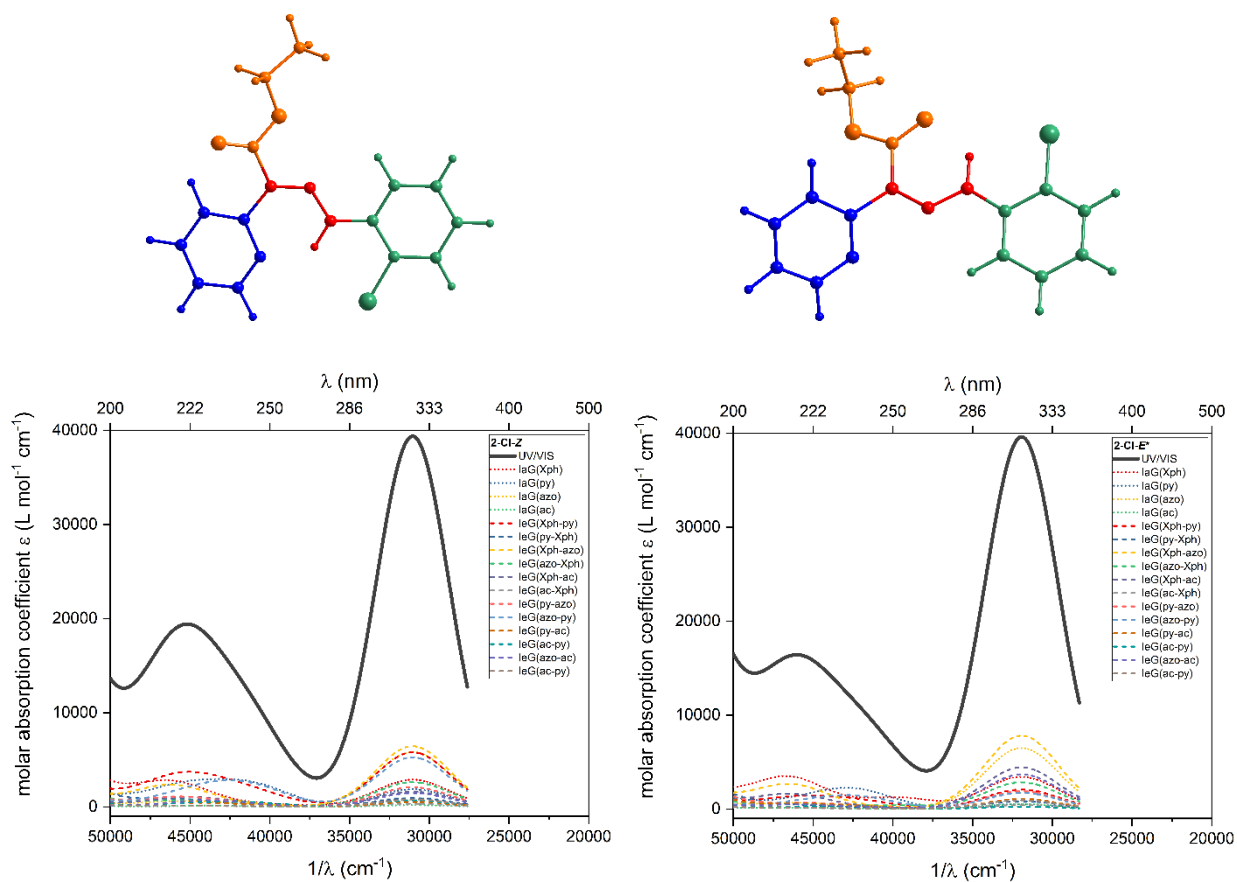

**Figure S55.** The graphically marked fragments of 2-Cl-Z (left) and 2-Cl-E\* (right) used for ICFT analysis of TD-DFT spectra.

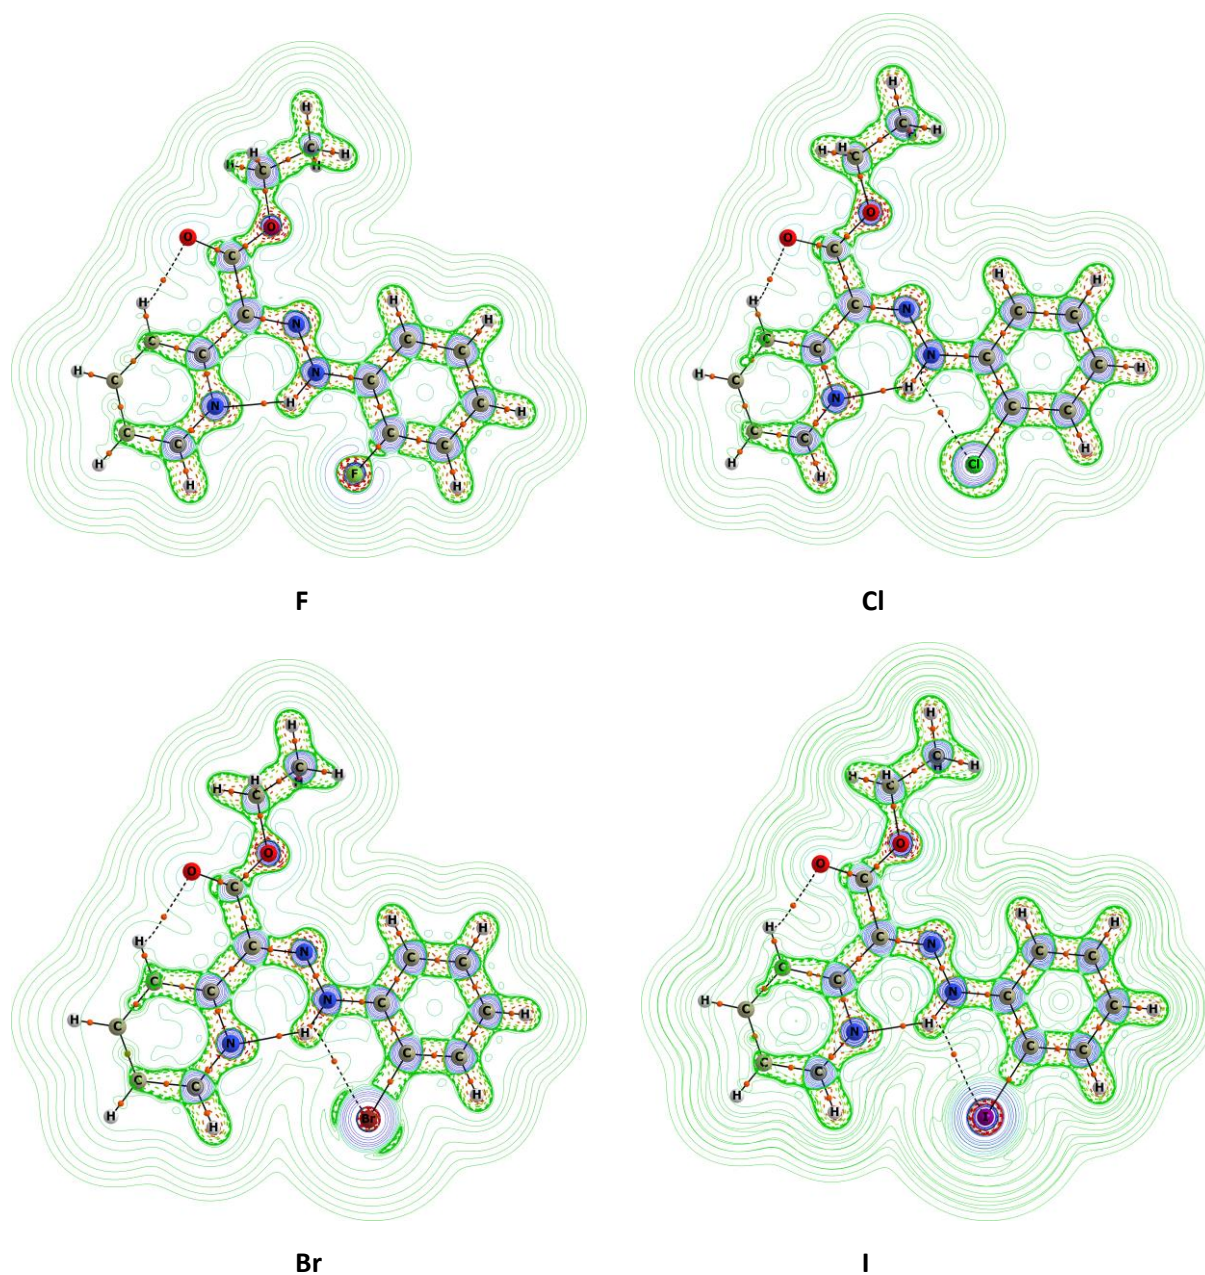

**Figure S56.** Depiction of the Laplacian of calculated electron density  $\nabla^2\rho(\mathbf{r})$  for the optimized geometries (implicit solvation model C-PCM) of studied hydrazone switches in the *Z*-configuration. The (3, -1) bond critical points (brown dots) and bond paths (black solid and dashed lines) are depicted.



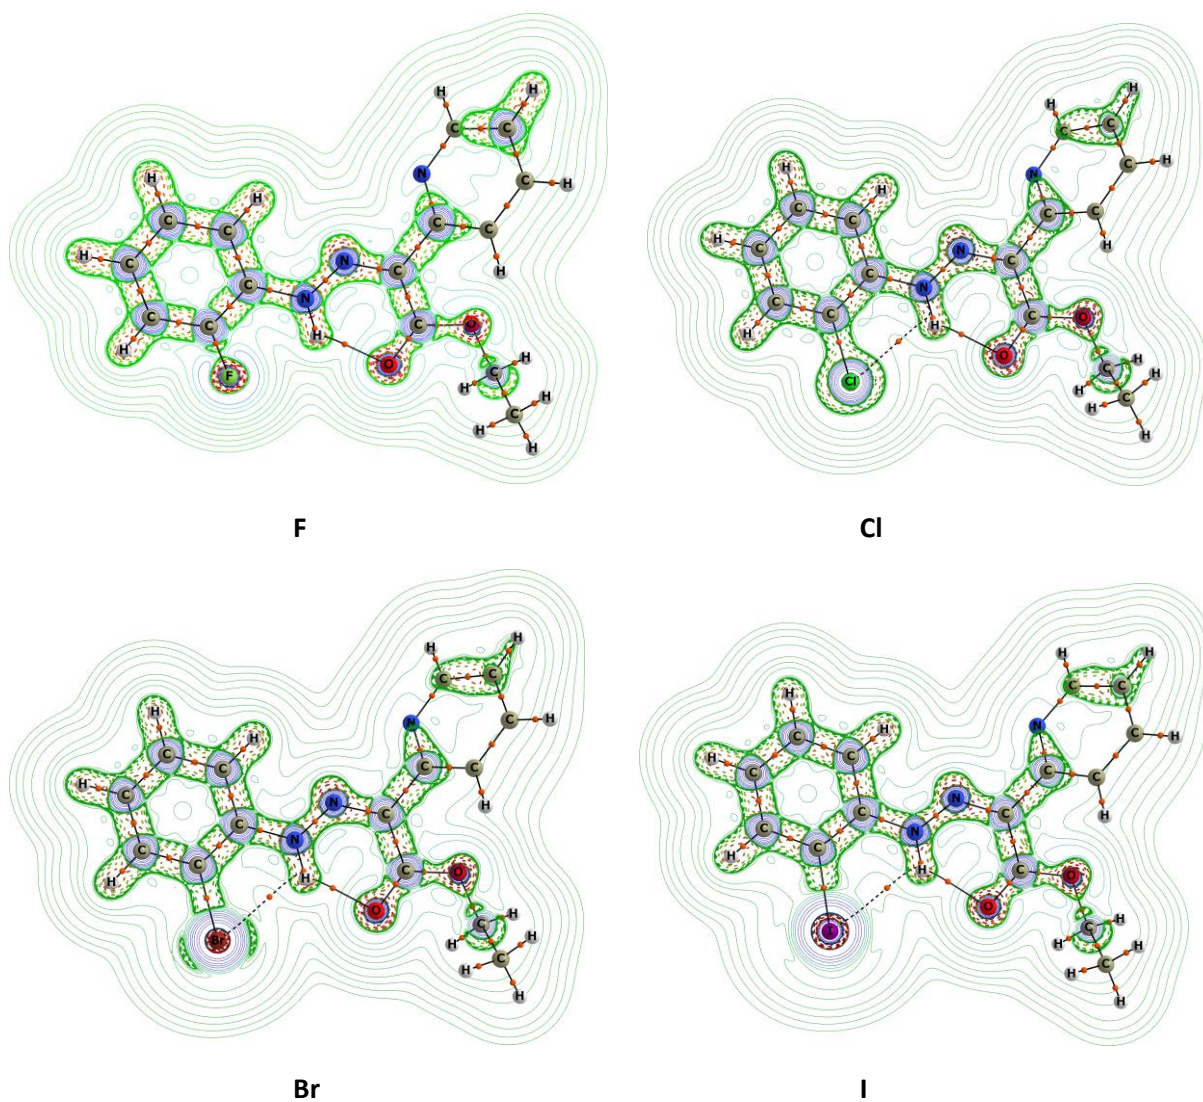

**Figure S57.** Depiction of the Laplacian of calculated electron density  $\nabla^2\rho(\mathbf{r})$  for the optimized geometries (implicit solvation model C-PCM) of studied hydrazone switches in the *E*-configuration. The (3, -1) bond critical points (brown dots) and bond paths (black solid and dashed lines) are depicted.

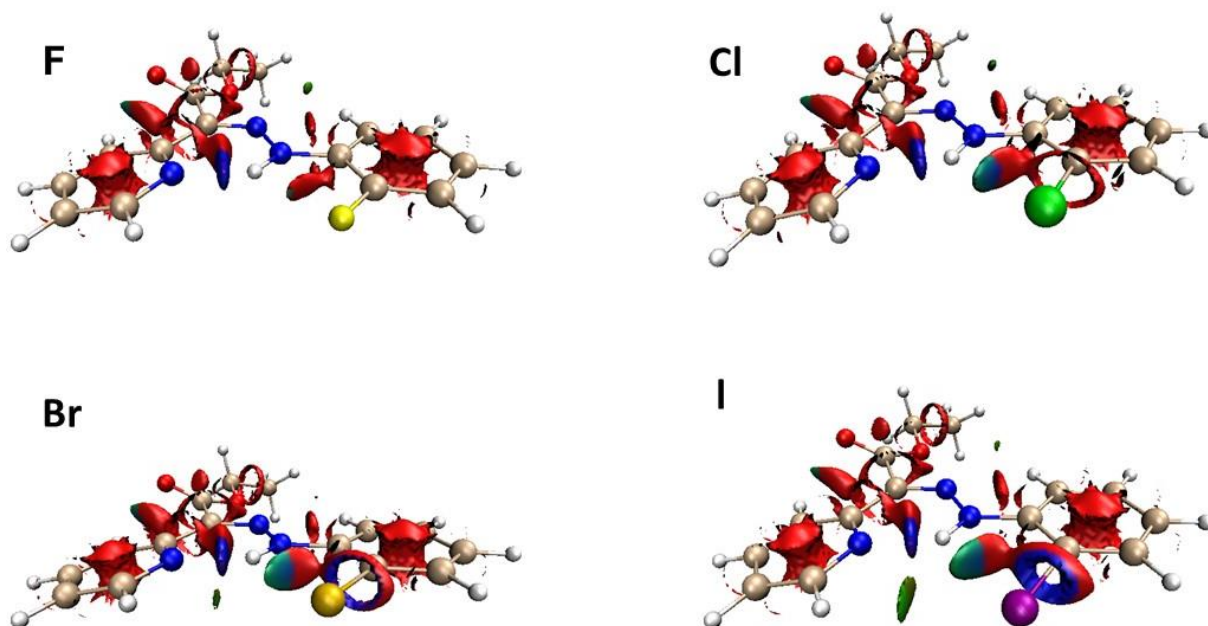

**Figure S58.** Gradient isosurfaces ( $s = 0.42$  au) for the optimized geometries (implicit solvation model C-PCM) of studied hydrazone switches in the *Z*-configuration. The surfaces are colored on a blue-green-red scale according to values of  $\text{sign}(\lambda_2)r$ , ranging from  $-0.04$  to  $0.04$  au. Blue indicates strong attractive interactions, and red indicates strong nonbonded overlap.

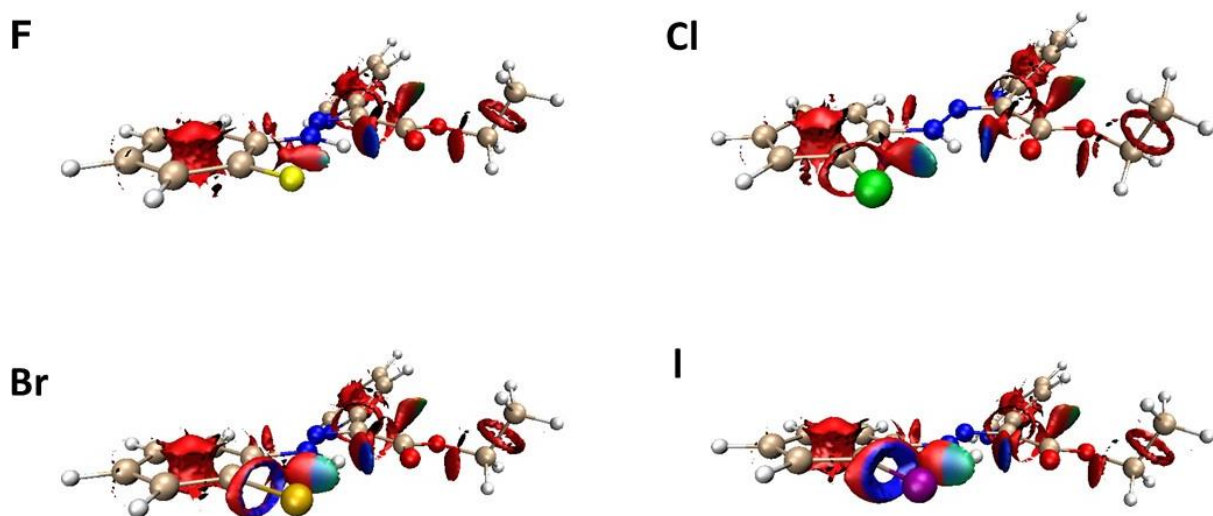

**Figure S59.** Gradient isosurfaces ( $s = 0.42$  au) for the optimized geometries (implicit solvation model C-PCM) of studied hydrazone switches in the *E*-configuration. The surfaces are colored on a blue-green-red scale according to values of  $\text{sign}(\lambda_2)r$ , ranging from  $-0.04$  to  $0.04$  au. Blue indicates strong attractive interactions, and red indicates strong nonbonded overlap.

**Table S8.** Topological and energetic properties of  $\rho(\mathbf{r})$  calculated at the selected (3, -1) critical points optimized geometries (implicit solvation model C-PCM) of studied hydrazone switches in the Z-configuration. All values are provided in atomic units (a. u.) unless stated otherwise.

|                        | $\nabla^2 \rho(\mathbf{r})$ | $h_e(\mathbf{r})$ | $G(\mathbf{r})$ | $V(\mathbf{r})$ | $ V(\mathbf{r}) /G(\mathbf{r})$ | $\varepsilon$ | $E_{\text{int}}/\text{kcal.mol}^{-1}$ |
|------------------------|-----------------------------|-------------------|-----------------|-----------------|---------------------------------|---------------|---------------------------------------|
| <b>2-F</b><br>N-H...N  | 0.12198                     | -0.000819         | 0.0313          | -0.03213        | 1.03                            | 0.005         | 10.1                                  |
| N-H...F                | –                           | –                 | –               | –               | –                               | –             | –                                     |
| <b>2-Cl</b><br>N-H...N | 0.12356                     | -0.000891         | 0.031779        | -0.032669       | 1.03                            | 0.00603       | 10.3                                  |
| N-H...Cl               | 0.06519                     | 0.00199           | 0.01431         | -0.01231        | 0.86                            | 1.1195        | 3.9                                   |
| <b>2-Br</b><br>N-H...N | 0.123537                    | -0.000899         | 0.03177         | -0.032662       | 1.03                            | 0.00671       | 10.2                                  |
| N-H...Br               | 0.05507                     | 0.001252          | 0.012515        | -0.01126        | 0.90                            | 0.6856        | 3.5                                   |
| <b>2-I</b><br>N-H...N  | 0.12335                     | -0.000852         | 0.03169         | -0.03254        | 1.03                            | 0.008143      | 10.2                                  |
| N-H...I                | 0.04736                     | 0.000937          | 0.0109025       | -0.009966       | 0.91                            | 0.529034      | 3.1                                   |

**Table S9.** Topological and energetic properties of  $\rho(\mathbf{r})$  calculated at the selected (3, -1) critical points optimized geometries (implicit solvation model C-PCM) of studied hydrazone switches in the E-configuration. All values are provided in atomic units (a. u.) unless stated otherwise.

|                        | $\nabla^2 \rho(\mathbf{r})$ | $h_e(\mathbf{r})$ | $G(\mathbf{r})$ | $V(\mathbf{r})$ | $ V(\mathbf{r}) /G(\mathbf{r})$ | $\varepsilon$ | $E_{\text{int}}/\text{kcal.mol}^{-1}$ |
|------------------------|-----------------------------|-------------------|-----------------|-----------------|---------------------------------|---------------|---------------------------------------|
| <b>2-F</b><br>N-H...O  | 0.12360                     | +0.00078          | 0.03012         | -0.02934        | 0.97                            | 0.0166        | 9.2                                   |
| N-H...F                | –                           | –                 | –               | –               | –                               | –             | –                                     |
| <b>2-Cl</b><br>N-H...O | 0.12538                     | +0.00076          | 0.03058         | -0.02982        | 0.98                            | 0.01979       | 9.4                                   |
| N-H...Cl               | 0.06427                     | +0.00185          | 0.01422         | -0.01237        | 0.87                            | 0.8039        | 3.9                                   |
| <b>2-Br</b><br>N-H...O | 0.12498                     | +0.00079          | 0.03046         | -0.02967        | 0.97                            | 0.02222       | 9.3                                   |
| N-H...Br               | 0.05464                     | +0.00112          | 0.01254         | -0.01143        | 0.91                            | 0.5115        | 3.6                                   |
| <b>2-I</b><br>N-H...O  | 0.12448                     | +0.00086          | 0.03026         | -0.02940        | 0.97                            | 0.02512       | 9.2                                   |
| N-H...I                | 0.04691                     | +0.00081          | 0.01092         | -0.01012        | 0.93                            | 0.39755       | 3.2                                   |

**Table S10.** The values of  $\text{sign}(\lambda_2)\rho$  calculated at (3, -1) critical points of the N-H...X for optimized geometries (implicit solvation model C-PCM) of studied hydrazone switches.

|                 | <b>Cl</b> | <b>Br</b> | <b>I</b>  |
|-----------------|-----------|-----------|-----------|
| Z-configuration | +0.026878 | +0.023961 | -0.022858 |
| E-configuration | +0.026700 | -0.024296 | -0.02323  |
